# Supplementary material for: Pd(ii)-Catalyzed arylation of unactivated methylene C(sp3)–H bonds with aryl halides using a removable auxiliary
Source: Royal Society of Chemistry journal article supplement (doi:10.1039/c4cc03615h), 2014-01-01

## Supporting Information

### Pd(II)-Catalyzed Arylation of Unactivated Methylene C(sp<sup>3</sup>)-H bonds with Aryl Halides Using a Removable Bidentate Auxiliary

Qi Zhang,<sup>‡<sup>a</sup></sup> Xue-Song Yin,<sup>‡<sup>a</sup></sup> Sheng Zhao,<sup>a</sup> Sheng-Long Fang,<sup>a</sup> and Bing-Feng Shi<sup>\*<sup>a,b</sup></sup>

<sup>a</sup>Department of Chemistry, Zhejiang University, Hangzhou 310027, China

<sup>b</sup>State Key Laboratory of Bioorganic and Natural Products Chemistry, Shanghai Institute of Organic Chemistry, Chinese Academy of Sciences, Shanghai 200032, China

\*To whom correspondence should be addressed. Email: [bfshi@zju.edu.cn](mailto:bfshi@zju.edu.cn)

<sup>‡</sup> These authors contributed equally to this work.

|                                                       |         |
|-------------------------------------------------------|---------|
| <b>Table of Contents</b>                              | S1      |
| <b>General Information</b>                            | S2      |
| <b>Experimental Procedures</b>                        | S2-S29  |
| Preparation of 2-(Pyridin-2-yl)propan-2-amine         | S2      |
| Preparation of Starting Materials                     | S3-S5   |
| Optimization of the Reaction Conditions for Arylation | S6      |
| General Procedures for Arylation                      | S6-S27  |
| Cleavage of Directing Group                           | S28     |
| <b>References</b>                                     | S28     |
| <b><sup>1</sup>H and <sup>13</sup>C NMR Spectra</b>   | S28-S78 |

## General Information

Toluene were dried by sodium and distilled. Pd(OAc)<sub>2</sub> was obtained from Strem<sup>®</sup> and CH<sub>3</sub>MgBr from Rockwood Lithium<sup>®</sup>. The other materials and solvents were purchased from Adamas-beta and other suppliers and used without further purification.

NMR spectra were recorded on a Bruker-400 instrument and calibrated using residual undeuterated solvent (or Tetramethylsilane in several cases) as an internal reference. The following abbreviations (or combinations thereof) were used to explain multiplicities: s = singlet, d = doublet, t = triplet, m = multiplet, br = broad, q = quadruplet. High-resolution mass spectra (HRMS) were recorded on EI-TOF (electrospray ionization-time of flight) (or ESI-TOF in several cases).

## Experimental Procedures

### Preparation of 2-(Pyridin-2-yl)isopropylamine (PIP-amine)

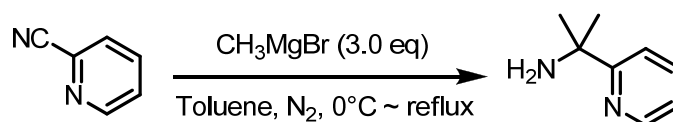

An improvement of the work-up procedure to the literature<sup>[1]</sup> was used: To a solution of 2-cyanopyridine (33.0 g, 0.32 mol) in 500 ml of toluene was added CH<sub>3</sub>MgBr (3.2M in 2-methyl tetrahydrofuran, 300ml, 0.96 mol) dropwise at 0 °C in a nitrogen atmosphere by vigorous magnetometric stirring. Upon completion of addition, the mixture was refluxed overnight. The reaction was quenched by adding saturated aqueous NH<sub>4</sub>Cl dropwise at 0 °C until the dark mixture changed to yellow. The suspension was filtrated through a pad of celite<sup>®</sup> and the filtration was acidified by aqueous HCl (6 M, 10 ml). The resulting water phase combined with the filter residue was basified by saturated aqueous NaOH until the yellow colored mixture turned dark brown with slurry sticky to the bottom. The mixture was washed with dichloromethane (500 ml×4) carefully and the supernatant was combined and concentrated using a rotary evaporator. The crude product was further purified by distillation under reduced pressure. The target product was obtained as a light yellow liquid (>98% purity, 24 g, 55%). <sup>1</sup>H NMR (400 MHz, CDCl<sub>3</sub>) δ 8.55 (d, *J* = 4.2 Hz, 1 H), 7.63 (td, *J* = 7.8, 1.8 Hz, 1 H), 7.45 (d, *J* = 8.0 Hz, 1 H), 7.12 (ddd, *J* = 7.4, 4.8, 0.8 Hz, 1 H), 1.87 (s, 2 H), 1.50 (s, 6 H); <sup>13</sup>C NMR (100 MHz, CDCl<sub>3</sub>) δ 168.32, 148.78, 136.55, 121.41, 118.53, 54.14, 31.35.

## Preparation of Starting Materials

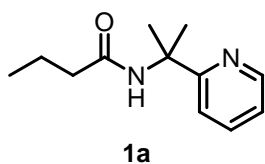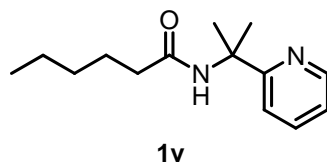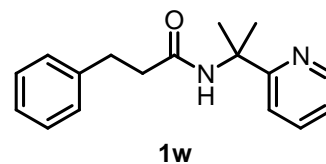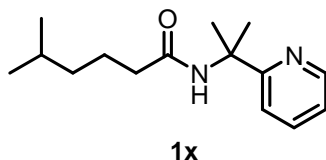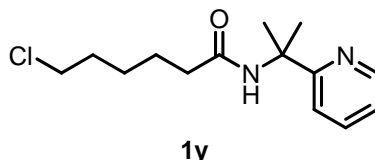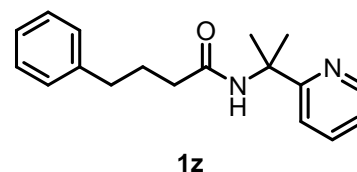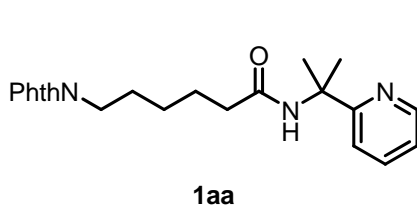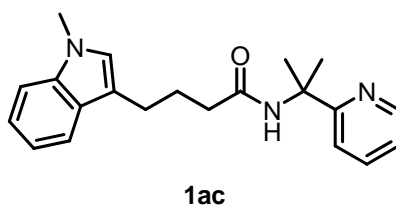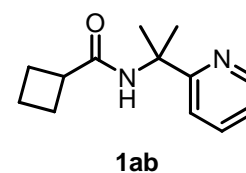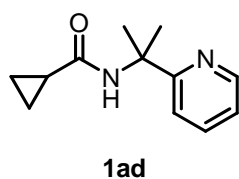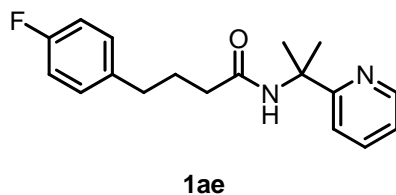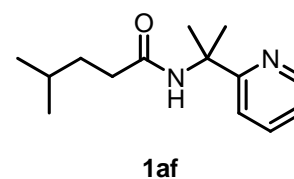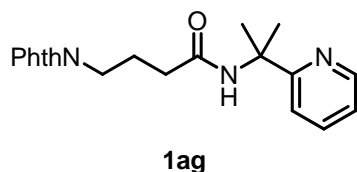

Compounds **1a**, **1v**, **1w**, **1x**, **1y**, **1z**, **1aa**, **1ae** and **1ag** were known compounds and were prepared according to literature.<sup>[2]</sup> **1ab**, **1ac**, **1ad**, **1af** and **1ag** were prepared according to the following procedure. To a round bottom flask were added the corresponding acid (5.5 mmol), N-methylmorpholine (12 mmol) and anhydrous dichloromethane (20 mL). The flask was submerged in an ice-salt bath and precooled for about 15 min. Then isobutylchloroformate (6 mmol) was added dropwise and the reaction mixture was stirred for a further 30min. After the dropwise addition of PIP amine (5 mmol), the reaction was stirred overnight and allowed to warm to room temperature. The resulting mixture was diluted with dichloromethane, washed with sat. NaHCO<sub>3</sub> followed by brine and dried over MgSO<sub>4</sub>. After filtration and concentration, the residue was purified by flash chromatography to give the desired product.

#### 4-(1-Methyl-1H-indol-3-yl)-N-(2-(pyridin-2-yl)propan-2-yl)butanamide (1ac)

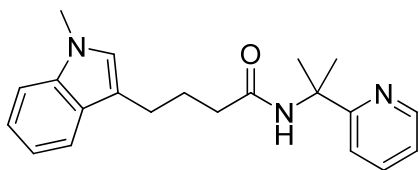

$^1\text{H}$  NMR (400 MHz,  $\text{CDCl}_3$ )  $\delta$  8.50 (d,  $J = 4.8$  Hz, 1H), 7.71 (dt,  $J = 8.0, 1.6$  Hz, 1H), 7.66-7.59 (m, 2H), 7.40 (d,  $J = 8.0$  Hz, 1H), 7.28 (d,  $J = 8.0$  Hz, 1H), 7.23-7.16 (m, 2H), 7.10-7.06 (m, 1H), 6.88 (s, 1H), 3.74 (s, 3H), 2.82 (t,  $J = 7.2$  Hz, 2H), 2.32 (t,  $J = 7.2$  Hz, 2H), 2.11-2.03 (m, 2H), 1.75 (s, 6H);  $^{13}\text{C}$  NMR (100 MHz,  $\text{CDCl}_3$ )  $\delta$  172.4, 164.8, 147.7, 137.2, 128.1, 126.6, 122.0, 121.6, 119.7, 119.2, 118.7, 114.6, 109.2, 56.5, 37.4, 32.7, 27.7, 26.5, 24.5; HRMS (EI-TOF) calc. for  $\text{C}_{21}\text{H}_{25}\text{N}_3\text{O}$  ( $\text{M}^+$ ): 335.1998; Found: 335.1998.

#### N-(2-(Pyridin-2-yl)propan-2-yl)cyclobutanecarboxamide (1ab)

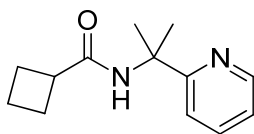

$^1\text{H}$  NMR (400 MHz,  $\text{CDCl}_3$ )  $\delta$  8.50 (d,  $J = 4.4$  Hz, 1H), 7.70 (dt,  $J = 7.6, 1.6$  Hz, 1H), 7.59 (brs, 1H), 7.40 (d,  $J = 8.0$  Hz, 1H), 7.18 (ddd,  $J = 7.6, 5.2, 0.8$  Hz, 1H), 3.14-3.05 (m, 1H), 2.36-2.25 (m, 2H), 2.21-2.12 (m, 2H), 2.01-1.88 (m, 2H), 1.75 (s, 6H);  $^{13}\text{C}$  NMR (100 MHz,  $\text{CDCl}_3$ )  $\delta$  174.4, 164.9, 147.8, 137.2, 121.9, 119.6, 56.3, 41.1, 27.7, 25.5, 18.2; HRMS (EI-TOF) calc. for  $\text{C}_{13}\text{H}_{18}\text{N}_2\text{O}$  ( $\text{M}^+$ ): 218.1419; Found: 218.1421.

#### N-(2-(Pyridin-2-yl)propan-2-yl)cyclopropanecarboxamide (1ad)

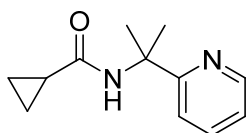

$^1\text{H}$  NMR (400 MHz,  $\text{CDCl}_3$ )  $\delta$  8.52 (d,  $J = 4.4$  Hz, 1H), 7.83 (brs, 1H), 7.71 (dt,  $J = 8.0, 1.6$  Hz, 1H), 7.40 (d,  $J = 8.0$  Hz, 1H), 7.19 (ddd,  $J = 7.6, 5.2, 0.8$  Hz, 1H), 1.75 (s, 6H), 1.54-1.47 (m, 1H), 0.95-0.90 (m, 2H), 0.73-0.67 (m, 2H);  $^{13}\text{C}$  NMR (100 MHz,  $\text{CDCl}_3$ )  $\delta$  172.6, 164.9, 147.8, 137.2, 121.9, 119.6, 56.7, 27.9, 15.8, 6.9; HRMS (EI-TOF) calc. for  $\text{C}_{12}\text{H}_{16}\text{N}_2\text{O}$  ( $\text{M}^+$ ): 204.1263; Found:

204.1265.

**4-Methyl-N-(2-(pyridin-2-yl)propan-2-yl)pentanamide (1af)**

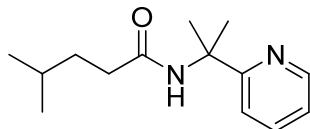

$^1\text{H}$  NMR (400 MHz,  $\text{CDCl}_3$ )  $\delta$  8.52 (d,  $J = 4.4$  Hz, 1H), 7.73-7.64 (m, 2H), 7.40 (d,  $J = 8.0$  Hz, 1H), 7.19 (ddd,  $J = 8.0, 4.8, 0.8$  Hz, 1H), 2.28-2.23 (m, 2H), 1.75 (s, 6H), 1.62-1.53 (m, 3H), 0.92 (d,  $J = 6.0$  Hz, 6H);  $^{13}\text{C}$  NMR (100 MHz,  $\text{CDCl}_3$ )  $\delta$  172.7, 164.9, 147.8, 137.2, 121.9, 119.6, 56.5, 36.0, 34.7, 28.0, 27.7, 22.5. HRMS (EI-TOF) calc. for  $\text{C}_{14}\text{H}_{22}\text{N}_2\text{O}$  ( $\text{M}^+$ ): 234.1732; Found: 234.1727.

## Optimization of the Reaction Conditions for Arylation

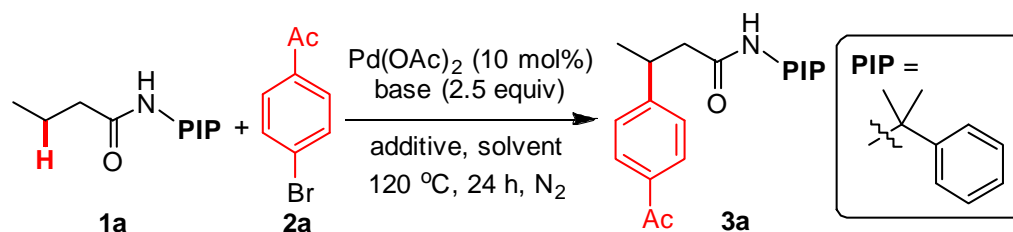

| Entry           | Base                           | Additive (equiv)                           | Solvent           | Yield (%) <sup>b</sup> |
|-----------------|--------------------------------|--------------------------------------------|-------------------|------------------------|
| 1               | K <sub>2</sub> CO <sub>3</sub> | (BnO) <sub>2</sub> PO <sub>2</sub> H (0.2) | <i>t</i> -Amyl-OH | 39                     |
| 2               | K <sub>2</sub> CO <sub>3</sub> | MesCOOH (0.2)                              | <i>t</i> -Amyl-OH | 41                     |
| 3               | K <sub>2</sub> CO <sub>3</sub> | PivOH (0.2)                                | <i>t</i> -Amyl-OH | 53                     |
| 4               | AgF                            | -                                          | <i>t</i> -Amyl-OH | trace                  |
| 5               | KHCO <sub>3</sub>              | PivOH (0.2)                                | <i>t</i> -Amyl-OH | 17                     |
| 6               | K <sub>3</sub> PO <sub>4</sub> | PivOH (0.2)                                | <i>t</i> -Amyl-OH | 43                     |
| 7               | CsCO <sub>3</sub>              | PivOH (0.2)                                | <i>t</i> -Amyl-OH | 23                     |
| 8               | NaHCO <sub>3</sub>             | PivOH (0.2)                                | <i>t</i> -Amyl-OH | trace                  |
| 9               | K <sub>2</sub> CO <sub>3</sub> | PivOH (0.2)                                | DCM               | 36                     |
| 10              | K <sub>2</sub> CO <sub>3</sub> | PivOH (0.2)                                | toluene           | 25                     |
| <b>11</b>       | K <sub>2</sub> CO <sub>3</sub> | PivOH (0.2)                                | <i>t</i> -BuOH    | <b>75<sup>c</sup></b>  |
| 12 <sup>d</sup> | K <sub>2</sub> CO <sub>3</sub> | PivOH (0.2)                                | <i>t</i> -Amyl-OH | 41                     |

<sup>a</sup> Reaction conditions: **1a** (0.15 mmol), Pd(OAc)<sub>2</sub> (10 mol%), base and additive in 1.5 mL solvent at 120 °C for 36 h. <sup>b</sup> <sup>1</sup>H NMR yield using CH<sub>2</sub>Br<sub>2</sub> as the internal standard. <sup>c</sup> Isolated yield. <sup>d</sup> Pd(TFA)<sub>2</sub> (10 mmol%) was used.

## General Procedures for Arylation

### General Procedure for Arylation Using Aryl Bromides as Arylating Reagents (GP1)

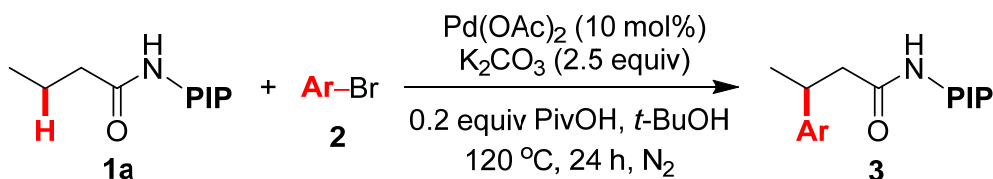

To a 50 mL Schlenk tube, **1** (30.9 mg, 0.15 mmol), aryl bromide (0.3 mmol), Pd(OAc)<sub>2</sub> (3.4 mg, 0.015 mmol), K<sub>2</sub>CO<sub>3</sub> (51.8 mg, 0.375 mmol), Pivalic acid (3.1 mg, 0.03 mmol) and *t*-BuOH (2 mL) were added. The tube was charged with N<sub>2</sub> and heated at 120 °C for 24 hours. After cooling to room temperature, the reaction mixture was diluted with dichloromethane and filtered through a pad of MgSO<sub>4</sub>. After concentration, the residue was purified by flash chromatography to give the target products.

### General Procedure for Arylation Using Aryl Iodides as Arylating Reagents (GP2)

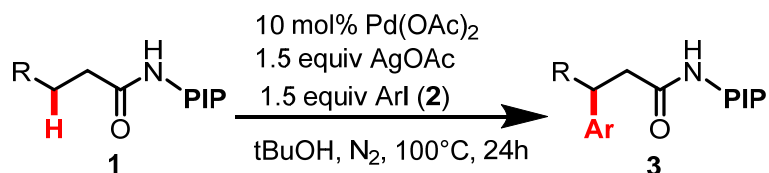

To a 50 mL Schlenk tube, **1** (0.2 mmol), Pd(OAc)<sub>2</sub> (4.5 mg, 0.02 mmol), AgOAc (50.1 mg, 0.3 mmol), aryl iodide (0.3 mmol), *t*-BuOH (2 mL) were added. The tube was charged with N<sub>2</sub> and the mixture was then heated at 100 °C for 24 h. After cooling to room temperature, the reaction mixture was diluted with ethyl acetate and filtered through a pad of celite<sup>®</sup> and concentrated. The target product was obtained by flash chromatography.

### 3-(4-Acetylphenyl)-*N*-(2-(pyridin-2-yl)propan-2-yl)butanamide (**3a**)

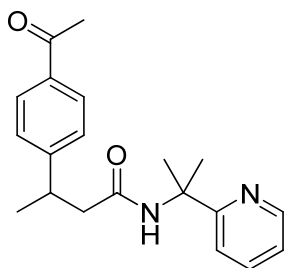

The title compound **3a** was prepared according to **GP1**. A purification by flash chromatography in petroleum ether : ethyl acetate = 1 : 3 gave **3a** as a white solid (36.3 mg, 75%). <sup>1</sup>H NMR (400 MHz, CDCl<sub>3</sub>) δ 8.46 (d, *J* = 4.4 Hz, 1H), 7.89 (d, *J* = 8.4 Hz, 2H), 7.75-7.61 (m, 2H), 7.37 (d, *J* = 8.4 Hz, 2H), 7.29 (d, *J* = 7.6 Hz, 1H), 7.17 (dd, *J* = 6.8, 5.6 Hz, 1H), 3.50-3.34 (m, 1H), 2.62-2.43 (m, 5H), 1.68 (s, 3H), 1.62 (s, 3H), 1.34 (d, *J* = 6.8 Hz, 3H); <sup>13</sup>C NMR (100 MHz, CDCl<sub>3</sub>) δ 198.0, 170.3, 164.3, 152.0, 147.5, 137.1, 135.4, 128.7, 127.3, 121.9, 119.5, 56.5, 46.2, 37.1, 27.5, 27.4, 26.7, 21.4; HRMS (EI-TOF) calc. for C<sub>20</sub>H<sub>24</sub>N<sub>2</sub>O<sub>2</sub> (M<sup>+</sup>): 324.1838; Found: 324.1831.

### 3-Phenyl-*N*-(2-(pyridin-2-yl)propan-2-yl)butanamide (**3b**)

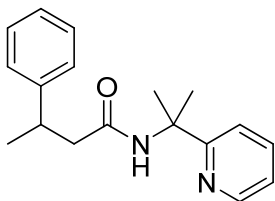

The title compound **3b** was prepared according to **GP1**. A purification by flash chromatography in petroleum ether : ethyl acetate = 1 : 4 gave **3b** as a light yellow oil (31.5 mg, 74%). <sup>1</sup>H NMR (400 MHz, CDCl<sub>3</sub>) δ 8.49-8.43 (m, 1H), 7.64 (dt, *J* = 8.0, 1.6 Hz, 1H), 7.51 (brs, 1H), 7.33-7.21 (m, 5H),

7.21-7.09 (m, 2H), 3.39-3.27 (m,  $J = 7.2$  Hz, 1H), 2.57-2.51 (ABd, 1H), 2.49-2.43 (ABd, 1H), 1.67 (s, 3H), 1.62 (s, 3H), 1.32 (d,  $J = 7.2$  Hz, 3H);  $^{13}\text{C}$  NMR (100 MHz,  $\text{CDCl}_3$ )  $\delta$  170.9, 164.5, 147.6, 146.3, 137.0, 128.5, 127.0, 126.3, 121.8, 119.4, 56.5, 46.7, 37.2, 27.5, 27.4, 21.7; HRMS (EI-TOF) calc. for  $\text{C}_{18}\text{H}_{22}\text{N}_2\text{O}$  ( $\text{M}^+$ ): 282.1732; Found: 282.1725.

### *N*-(2-(Pyridin-2-yl)propan-2-yl)-3-*p*-tolylbutanamide (**3c**)

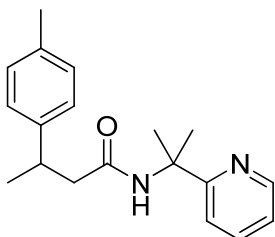

The title compound **3c** was prepared according to **GP1**. A purification by flash chromatography in petroleum ether : ethyl acetate = 1 : 1 gave **3c** as a colorless oil (31.0 mg, 70%).  $^1\text{H}$  NMR (400 MHz,  $\text{CDCl}_3$ )  $\delta$  8.47 (d,  $J = 4.4$  Hz, 1H), 7.68-7.61 (m, 1H), 7.49 (brs, 1H), 7.27 (d,  $J = 8.0$  Hz, 1H), 7.20-7.13 (m, 3H), 7.10 (d,  $J = 8.0$ , 2H), 3.37-3.20 (m, 1H), 2.56-2.50 (ABd, 1H), 2.46-2.40 (ABd, 1H), 2.30 (s, 3H), 1.68 (s, 3H), 1.64 (s, 3H), 1.30 (d,  $J = 6.8$  Hz, 3H);  $^{13}\text{C}$  NMR (100 MHz,  $\text{CDCl}_3$ )  $\delta$  171.0, 164.6, 147.7, 143.3, 137.0, 135.7, 129.2, 126.9, 121.8, 119.5, 56.6, 46.8, 36.8, 27.6, 27.5, 21.8, 21.1; HRMS (EI-TOF) calc. for  $\text{C}_{19}\text{H}_{24}\text{N}_2\text{O}$  ( $\text{M}^+$ ): 296.1889; Found: 296.1887.

### *N*-(2-(Pyridin-2-yl)propan-2-yl)-3-*m*-tolylbutanamide (**3d**)

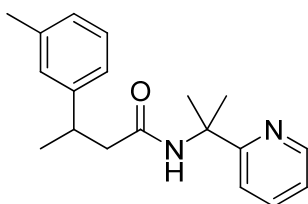

The title compound **3d** was prepared according to **GP1**. A purification by flash chromatography in petroleum ether : ethyl acetate = 1 : 1 gave **3d** as a colorless oil (29.0 mg, 65%).  $^1\text{H}$  NMR (400 MHz,  $\text{CDCl}_3$ )  $\delta$  8.47 (d,  $J = 4.4$  Hz, 1H), 7.65 (dt,  $J = 8.0, 1.2$  Hz, 1H), 7.49 (brs, 1H), 7.27 (d,  $J = 7.6$  Hz, 1H), 7.22-7.11 (m, 2H), 7.10-7.03 (m, 2H), 6.99 (d,  $J = 7.2$  Hz, 1H), 3.36-3.20 (m, 1H), 2.56-2.50 (ABd, 1H), 2.47-2.41 (ABd, 1H), 2.31 (s, 3H), 1.68 (s, 3H), 1.61 (s, 3H), 1.31 (d,  $J = 7.2$  Hz, 3H);  $^{13}\text{C}$  NMR (100 MHz,  $\text{CDCl}_3$ )  $\delta$  171.0, 164.6, 147.6, 146.2, 138.0, 137.1, 128.4, 127.9, 127.1, 124.0, 121.8, 119.5, 56.5, 46.8, 37.2, 27.5, 27.5, 21.7, 21.6; HRMS (EI-TOF) calc. for  $\text{C}_{19}\text{H}_{24}\text{N}_2\text{O}$  ( $\text{M}^+$ ): 296.1889; Found: 296.1897.



### 3-(4-Fluorophenyl)-N-(2-(pyridin-2-yl)propan-2-yl)butanamide (3e)

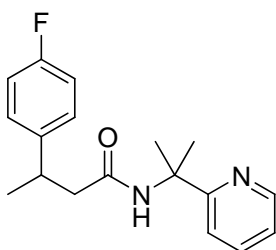

The title compound **3e** was prepared according to **GP1**. A purification by flash chromatography in petroleum ether : ethyl acetate = 1 : 4 gave **3e** as a colorless oil (20.2 mg, 45%). <sup>1</sup>H NMR (400 MHz, CDCl<sub>3</sub>) δ 8.46 (d, *J* = 4.4 Hz, 1H), 7.67 (dt, *J* = 8.0, 1.2 Hz, 1H), 7.59 (brs, 1H), 7.28 (d, *J* = 8.0 Hz, 1H), 7.22 (dd, *J* = 8.0, 5.6 Hz, 2H), 7.17 (dd, *J* = 7.2, 5.2 Hz, 1H), 6.96 (t, *J* = 8.8 Hz, 2H), 3.38-3.28 (m, 1H), 2.52-2.42 (ABd, 2H), 1.68 (s, 3H), 1.62 (s, 3H), 1.31 (d, *J* = 7.2 Hz, 3H); <sup>13</sup>C NMR (100 MHz, CDCl<sub>3</sub>) δ 170.7, 164.4, 161.4 (d, *J* = 242 Hz), 147.6, 141.9 (d, *J* = 3 Hz), 137.1, 128.5 (d, *J* = 8 Hz), 121.9, 119.5, 115.2 (d, *J* = 21 Hz), 56.5, 46.9, 36.5, 27.5, 27.4, 21.9; <sup>19</sup>F NMR (376 MHz, CDCl<sub>3</sub>) δ -117.29; HRMS (EI-TOF) calc. for C<sub>18</sub>H<sub>21</sub>FN<sub>2</sub>O (M<sup>+</sup>): 300.1638; Found: 300.1640.

### 3-(3-Fluorophenyl)-N-(2-(pyridin-2-yl)propan-2-yl)butanamide (3f)

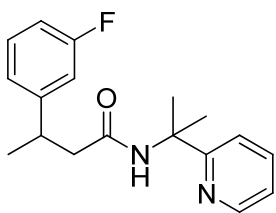

The title compound **3f** was prepared according to **GP1**. A purification by flash chromatography in petroleum ether : ethyl acetate = 1 : 4 gave **3f** as a colorless oil (30.0 mg, 67%). <sup>1</sup>H NMR (400 MHz, CDCl<sub>3</sub>) δ 8.47 (d, *J* = 4.4 Hz, 1H), 7.67 (dt, *J* = 8.0, 1.6 Hz, 1H), 7.63 (brs, 1H), 7.29 (d, *J* = 8.4 Hz, 1H), 7.26-7.20 (m, 1H), 7.17 (dd, *J* = 7.2, 5.2 Hz, 1H), 7.05 (d, *J* = 7.6 Hz, 1H), 7.00-6.95 (m, 1H), 6.86 (dt, *J* = 8.4, 2.0 Hz, 1H), 3.40-3.30 (m, 1H), 2.55-2.42 (ABd, 2H), 1.69 (s, 3H), 1.63 (s, 3H), 1.32 (d, *J* = 6.8 Hz, 3H); <sup>13</sup>C NMR (100 MHz, CDCl<sub>3</sub>) δ 170.5, 164.4, 163.0 (d, *J* = 244 Hz), 149.0 (d, *J* = 7 Hz), 147.6, 137.1, 129.9 (d, *J* = 8 Hz), 122.8 (d, *J* = 3 Hz), 121.9, 119.5, 113.9 (d, *J* = 21 Hz), 113.1 (d, *J* = 21 Hz), 56.5, 46.5, 36.9, 27.5, 27.4, 21.5; <sup>19</sup>F NMR (376 MHz, CDCl<sub>3</sub>) δ -113.50;

HRMS (EI-TOF) calc. for C<sub>18</sub>H<sub>21</sub>FN<sub>2</sub>O (M<sup>+</sup>): 300.1638; Found: 300.1637.

### 3-(4-Methoxyphenyl)-N-(2-(pyridin-2-yl)propan-2-yl)butanamide (3g)

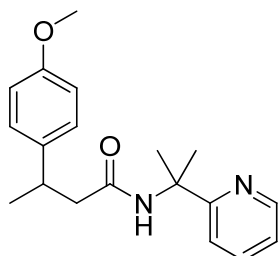

The title compound **3g** was prepared according to **GP1**. A purification by flash chromatography in petroleum ether : ethyl acetate = 1 : 1 gave **3g** as a colorless oil (22.0 mg, 46%). <sup>1</sup>H NMR (400 MHz, CDCl<sub>3</sub>) δ 8.47 (d, *J* = 4.4 Hz, 1H), 7.65 (t, *J* = 7.6 Hz, 1H), 7.50 (brs, 1H), 7.27 (d, *J* = 8.0 Hz, 1H), 7.20-7.13 (m, 3H), 6.83 (d, *J* = 8.4 Hz, 2H), 3.76 (s, 3H), 3.33-3.24 (m, 1H), 2.53-2.40 (ABd, 2H), 1.68 (s, 3H), 1.63 (s, 3H), 1.30 (d, *J* = 6.8 Hz, 3H); <sup>13</sup>C NMR (100 MHz, CDCl<sub>3</sub>) δ 171.0, 164.5, 158.0, 147.6, 138.4, 137.0, 127.9, 121.8, 119.5, 113.8, 56.5, 55.3, 47.0, 36.4, 27.6, 27.4, 21.9; HRMS (EI-TOF) calc. for C<sub>19</sub>H<sub>24</sub>N<sub>2</sub>O<sub>2</sub> (M<sup>+</sup>): 312.1838; Found: 312.1840.

### 3-(3-Methoxyphenyl)-N-(2-(pyridin-2-yl)propan-2-yl)butanamide (3h)

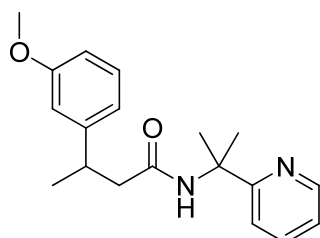

The title compound **3h** was prepared according to **GP1**. A purification by flash chromatography in petroleum ether : ethyl acetate = 1 : 1 gave **3h** as a colorless oil (29.2 mg, 62%). <sup>1</sup>H NMR (400 MHz, CDCl<sub>3</sub>) δ 8.47 (d, *J* = 8.4 Hz, 1H), 7.66 (t, *J* = 7.6 Hz, 1H), 7.52 (brs, 1H), 7.27 (d, *J* = 8.0 Hz, 1H), 7.21 (t, *J* = 7.6 Hz, 1H), 7.16 (dd, *J* = 6.8, 5.6 Hz, 1H), 6.87 (d, *J* = 7.6 Hz, 1H), 6.82 (s, 1H), 6.72 (dd, *J* = 7.6, 1.6 Hz, 1H), 3.78 (s, 3H), 3.38-3.24 (m, 1H), 2.57-2.51 (ABd, 1H), 2.47-2.41 (ABd, 1H), 1.68 (s, 3H), 1.63 (s, 3H), 1.32 (d, *J* = 7.2 Hz, 3H); <sup>13</sup>C NMR (100 MHz, CDCl<sub>3</sub>) δ 170.9, 164.5, 159.7, 148.0, 147.6, 137.1, 129.5, 121.8, 119.5, 119.4, 112.9, 111.6, 56.5, 55.2, 46.7, 37.2, 27.6, 27.4, 21.6; HRMS (EI-TOF) calc. for C<sub>19</sub>H<sub>24</sub>N<sub>2</sub>O<sub>2</sub> (M<sup>+</sup>): 312.1838; Found: 312.1843.

***N*-(2-(Pyridin-2-yl)propan-2-yl)-3-(4-(trifluoromethyl)phenyl)butanamide (3i)**

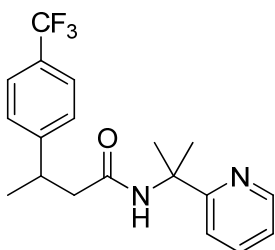

The title compound **3i** was prepared according to **GP1**. A purification by flash chromatography in petroleum ether : ethyl acetate = 1 : 4 gave **3i** as a white solid (31.8 mg, 61%).  $^1\text{H}$  NMR (400 MHz,  $\text{CDCl}_3$ )  $\delta$  8.45 (d,  $J = 4.4$  Hz, 1H), 7.67-7.64 (m, 2H), 7.53 (d,  $J = 8.0$  Hz, 2H), 7.38 (d,  $J = 8.0$  Hz, 2H), 7.28 (d,  $J = 8.4$  Hz, 1H), 7.17 (dd,  $J = 7.2, 4.8$  Hz, 1H), 3.47-3.37 (m, 1H), 2.57-2.46 (ABd, 2H), 1.68 (s, 3H), 1.62 (s, 3H), 1.34 (d,  $J = 6.8$  Hz, 3H);  $^{13}\text{C}$  NMR (100 MHz,  $\text{CDCl}_3$ )  $\delta$  170.3, 164.4, 150.4, 147.6, 137.2, 128.6 (q,  $J = 32$  Hz), 127.5, 125.4 (q,  $J = 4$  Hz), 124.4 (q,  $J = 270$  Hz), 122.0, 119.5, 56.5, 46.4, 37.0, 27.5, 27.4, 21.5;  $^{19}\text{F}$  NMR (376 MHz,  $\text{CDCl}_3$ )  $\delta$  -62.35; HRMS (EI-TOF) calc. for  $\text{C}_{19}\text{H}_{21}\text{F}_3\text{N}_2\text{O}$  ( $\text{M}^+$ ): 350.1606; Found: 350.1601.

***N*-(2-(Pyridin-2-yl)propan-2-yl)-3-(3-(trifluoromethyl)phenyl)butanamide (3j)**

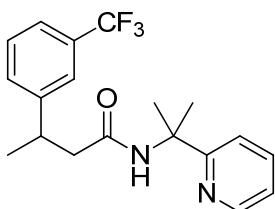

The title compound **3j** was prepared according to **GP1**. A purification by flash chromatography in petroleum ether : ethyl acetate = 1 : 4 gave **3j** as a yellow solid (31.1 mg, 59%).  $^1\text{H}$  NMR (400 MHz,  $\text{CDCl}_3$ )  $\delta$  8.45 (d,  $J = 4.4$  Hz, 1H), 7.68-7.64 (m, 2H), 7.51 (s, 1H), 7.48 - 7.36 (m, 3H), 7.28 (d,  $J = 8.4$  Hz, 1H), 7.16 (dd,  $J = 7.1, 5.2$  Hz, 1H), 3.47-3.35 (m, 1H), 2.51 (d,  $J = 7.5$  Hz, 2H), 1.67 (s, 3H), 1.58 (s, 3H), 1.34 (d,  $J = 7.0$  Hz, 3H).  $^{13}\text{C}$  NMR (100 MHz,  $\text{CDCl}_3$ )  $\delta$  170.3, 164.4, 147.6, 147.2, 137.2, 130.8 (d,  $J_{\text{C-F}} = 1.0$  Hz), 130.8 (q,  $J_{\text{C-F}} = 32.0$  Hz), 128.9, 124.37 (q,  $J_{\text{C-F}} = 270.7$  Hz), 123.8 (q,  $J_{\text{C-F}} = 3.8$  Hz), 123.2 (q,  $J_{\text{C-F}} = 3.8$  Hz), 121.9, 119.5, 56.5, 46.6, 37.1, 27.5, 27.4, 21.6;  $^{19}\text{F}$  NMR (376 MHz,  $\text{CDCl}_3$ )  $\delta$  -62.50; HRMS (EI-TOF) calc. for  $\text{C}_{19}\text{H}_{21}\text{F}_3\text{N}_2\text{O}$  ( $\text{M}^+$ ): 350.1606; Found: 350.1613.

### 3-(4-Cyanophenyl)-N-(2-(pyridin-2-yl)propan-2-yl)butanamide (3k)

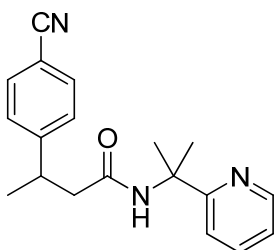

The title compound **3k** was prepared according to **GP1**. A purification by flash chromatography in petroleum ether : ethyl acetate = 1 : 4 gave **3k** as a white solid (29.3 mg, 64%). <sup>1</sup>H NMR (400 MHz, CDCl<sub>3</sub>) δ 8.43 (d, *J* = 4.8 Hz, 1H), 7.71 (brs, 1H), 7.66 (t, *J* = 8.0 Hz, 1H), 7.54 (d, *J* = 8.0 Hz, 2H), 7.35 (d, *J* = 8.4 Hz, 2H), 7.28 (d, *J* = 8.0 Hz, 1H), 7.16 (dd, *J* = 6.8, 5.2 Hz, 1H), 3.46-3.20 (m, 1H), 2.49 (d, *J* = 7.6 Hz, 2H), 1.65 (s, 3H), 1.57 (s, 3H), 1.30 (d, *J* = 6.8 Hz, 3H); <sup>13</sup>C NMR (100 MHz, CDCl<sub>3</sub>) δ 169.9, 164.2, 151.8, 147.5, 137.2, 132.3, 128.0, 122.0, 119.5, 119.1, 110.0, 56.5, 46.0, 37.2, 27.4, 27.3, 21.3; HRMS (EI-TOF) calc. for C<sub>19</sub>H<sub>21</sub>N<sub>3</sub>O (M<sup>+</sup>): 307.1685; Found: 307.1685.

### 3-(3-Cyanophenyl)-N-(2-(pyridin-2-yl)propan-2-yl)butanamide (3l)

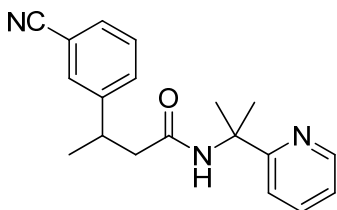

The title compound **3l** was prepared according to **GP1**. A purification by flash chromatography in petroleum ether : ethyl acetate = 1 : 1 gave **3l** as a colorless oil (22.0 mg, 48%). <sup>1</sup>H NMR (400 MHz, CDCl<sub>3</sub>) δ 8.48 (d, *J* = 4.8 Hz, 1H), 7.75 (brs, 1H), 7.69 (dt, *J* = 8.0, 1.2 Hz, 1H), 7.58 (s, 1H), 7.52 (d, *J* = 7.6 Hz, 1H), 7.47 (d, *J* = 7.6 Hz, 1H), 7.38 (t, *J* = 8.4 Hz, 1H), 7.31 (d, *J* = 8.0 Hz, 1H), 7.19 (dd, *J* = 7.2, 5.2 Hz, 1H), 3.48-3.32 (m, 1H), 2.56-2.46 (ABd, 2H), 1.68 (s, 3H), 1.60 (s, 3H), 1.34 (d, *J* = 7.2 Hz, 3H); <sup>13</sup>C NMR (100 MHz, CDCl<sub>3</sub>) δ 170.0, 164.2, 147.6, 147.5, 137.2, 132.0, 130.6, 130.0, 129.2, 121.9, 119.4, 119.1, 112.3, 56.4, 46.2, 36.7, 27.4, 27.3, 21.4; HRMS (EI-TOF) calc. for C<sub>19</sub>H<sub>21</sub>N<sub>3</sub>O (M<sup>+</sup>): 307.1685; Found: 307.1682.

### Methyl 4-(4-oxo-4-(2-(pyridin-2-yl)propan-2-ylamino)butan-2-yl)benzoate (3m)

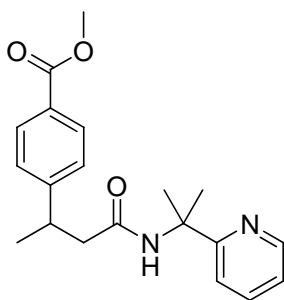

The title compound **3m** was prepared according to **GP1**. A purification by flash chromatography in petroleum ether : ethyl acetate = 1 : 4 gave **3m** as a colorless oil (24.1 mg, 47%). <sup>1</sup>H NMR (400 MHz, CDCl<sub>3</sub>) δ 8.46 (d, *J* = 4.4 Hz, 1H), 7.95 (d, *J* = 8.4 Hz, 2H), 7.69-7.64 (m, 2H), 7.34 (d, *J* = 8.0 Hz, 2H), 7.28 (d, *J* = 8.0 Hz, 1H), 7.16 (dd, *J* = 7.2, 5.2 Hz, 1H), 3.89 (s, 3H), 3.46-3.36 (m, 1H), 2.57-2.46 (ABd, 2H), 1.68 (s, 3H), 1.61 (s, 3H), 1.34 (d, *J* = 7.2 Hz, 3H); <sup>13</sup>C NMR (100 MHz, CDCl<sub>3</sub>) δ 170.4, 167.2, 164.4, 151.7, 147.6, 137.1, 129.9, 128.2, 127.2, 121.9, 119.5, 56.5, 52.1, 46.3, 37.1, 27.5, 27.4, 21.5; HRMS (EI-TOF) calc. for C<sub>20</sub>H<sub>24</sub>N<sub>2</sub>O<sub>3</sub> (M<sup>+</sup>): 340.1787; Found: 340.1790.

### 3-(4-Nitrophenyl)-N-(2-(pyridin-2-yl)propan-2-yl)butanamide (**3n**)

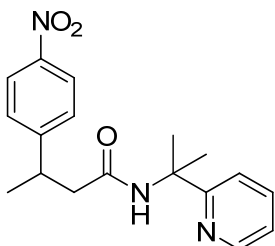

The title compound **3n** was prepared according to **GP1**. A purification by flash chromatography in petroleum ether : ethyl acetate = 1 : 4 gave **3n** as a light yellow oil (21.0 mg, 43%). <sup>1</sup>H NMR (400 MHz, CDCl<sub>3</sub>) δ 8.42 (d, *J* = 4.4 Hz, 1H), 8.11 (d, *J* = 8.8 Hz, 2H), 7.74 (brs, 1H), 7.65 (t, *J* = 7.6 Hz, 1H), 7.41 (d, *J* = 8.8 Hz, 2H), 7.28 (d, *J* = 8.0 Hz, 1H), 7.15 (dd, *J* = 6.8, 5.2 Hz, 1H), 3.53-3.38 (m, 1H), 2.52 (d, *J* = 7.6 Hz, 2H), 1.66 (s, 3H), 1.58 (s, 3H), 1.33 (d, *J* = 6.8 Hz, 3H); <sup>13</sup>C NMR (100 MHz, CDCl<sub>3</sub>) δ 169.8, 164.2, 154.1, 147.5, 146.5, 137.2, 128.0, 123.7, 122.0, 119.5, 56.5, 46.0, 37.0, 27.4, 27.3, 21.4; HRMS (EI-TOF) calc. for C<sub>18</sub>H<sub>21</sub>N<sub>3</sub>O (M<sup>+</sup>): 327.1583; Found: 327.1580.

### 3-(4-Acetamidophenyl)-N-(2-(pyridin-2-yl)propan-2-yl)butanamide (**3o**)

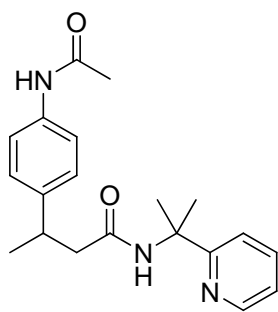

The title compound **3o** was prepared according to **GP1**. A purification by flash chromatography in petroleum ether : acetone = 1 : 1 gave **3o** as a white solid (23.0 mg, 45%). <sup>1</sup>H NMR (400 MHz, CDCl<sub>3</sub>) δ 8.47 (d, *J* = 4.8 Hz, 1H), 7.66 (t, *J* = 7.6 Hz, 1H), 7.55 (brs, 1H), 7.40 (d, *J* = 8.0 Hz, 2H), 7.33 (brs, 1H), 7.27 (d, *J* = 8.4 Hz, 1H), 7.21-7.14 (m, 3H), 3.34-3.24 (m, 1H), 2.53-2.40 (ABd, 2H), 2.14 (s, 3H), 1.67 (s, 3H), 1.63 (s, 3H), 1.29 (d, *J* = 7.6 Hz, 3H); <sup>13</sup>C NMR (100 MHz, CDCl<sub>3</sub>) δ 171.0, 168.6, 164.5, 147.7, 142.1, 137.1, 136.3, 127.4, 121.9, 120.2, 119.5, 56.6, 46.7, 36.6, 27.6, 27.5, 24.6, 21.8; HRMS (EI-TOF) calc. for C<sub>20</sub>H<sub>25</sub>N<sub>3</sub>O<sub>2</sub> (M<sup>+</sup>): 339.1947; Found: 339.1961.

### 3-(4-Chlorophenyl)-*N*-(2-(pyridin-2-yl)propan-2-yl)butanamide (**3p**)

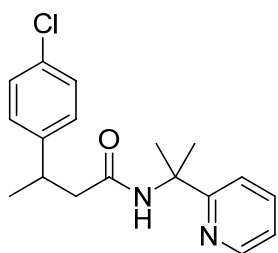

The title compound **3p** was prepared according to **GP1**. A purification by flash chromatography in petroleum ether : ethyl acetate = 1 : 4 gave **3p** as a colorless oil (11.0 mg, 23%). <sup>1</sup>H NMR (400 MHz, CDCl<sub>3</sub>) δ 8.47 (d, *J* = 4.4 Hz, 1H), 7.67 (t, *J* = 8.4 Hz, 1H), 7.60 (brs, 1H), 7.28-7.15 (m, 6H), 3.67-3.28 (m, 1H), 2.52-2.42 (ABd, 2H), 1.68 (s, 3H), 1.63 (s, 3H), 1.30 (d, *J* = 6.8 Hz, 3H); <sup>13</sup>C NMR (100 MHz, CDCl<sub>3</sub>) δ 170.5, 164.4, 147.6, 144.7, 137.1, 131.8, 128.6, 128.5, 121.9, 119.5, 56.5, 46.6, 36.6, 27.6, 27.4, 21.7; HRMS (EI-TOF) calc. for C<sub>18</sub>H<sub>21</sub>ClN<sub>2</sub>O (M<sup>+</sup>): 316.1342; Found: 316.1347.

### 3-(4-(Hydroxymethyl)phenyl)-*N*-(2-(pyridin-2-yl)propan-2-yl)butanamide (**3q**)

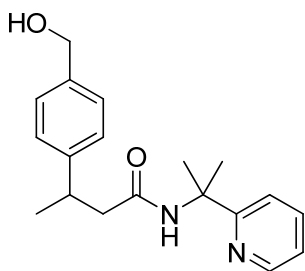

The title compound **3q** was prepared according to **GP1**. A purification by flash chromatography in petroleum ether : ethyl acetate = 1 : 1 gave **3q** as a colorless oil (18.0 mg, 38%).  $^1\text{H}$  NMR (400 MHz,  $\text{CDCl}_3$ )  $\delta$  8.45 (d,  $J = 4.4$  Hz, 1H), 7.66 (t,  $J = 7.6$  Hz, 1H), 7.55 (brs, 1H), 7.30-7.26 (m, 3H), 7.23 (d,  $J = 8.0$  Hz, 2H), 7.18-7.14 (m, 1H), 4.62 (s, 2H), 3.36-3.26 (m, 1H), 2.71-2.39 (m, 3H), 1.67 (s, 3H), 1.63 (s, 3H), 1.30 (d,  $J = 6.8$  Hz, 3H);  $^{13}\text{C}$  NMR (100 MHz,  $\text{CDCl}_3$ )  $\delta$  171.0, 164.4, 147.6, 145.6, 139.1, 137.1, 127.3, 127.2, 121.9, 119.5, 65.0, 56.5, 46.6, 36.8, 27.6, 27.4, 21.7; HRMS (EI-TOF) calc. for  $\text{C}_{19}\text{H}_{24}\text{N}_2\text{O}_2$  ( $\text{M}^+$ ): 312.1838; Found: 312.1834.

### 3-(4-Hydroxy-3-nitrophenyl)-N-(2-(pyridin-2-yl)propan-2-yl)butanamide (**3r**)

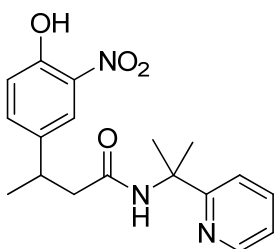

The title compound **3r** was prepared according to **GP1**. A purification by flash chromatography in petroleum ether : ethyl acetate = 1 : 1 gave **3r** as a yellow oil (14.0 mg, 27%).  $^1\text{H}$  NMR (400 MHz,  $\text{CDCl}_3$ )  $\delta$  10.43 (brs, 1H), 8.43 (d,  $J = 4.4$  Hz, 1H), 7.96 (s, 1H), 7.75 (brs, 1H), 7.66 (t,  $J = 7.6$  Hz, 1H), 7.50 (d,  $J = 8.4$  Hz, 1H), 7.30 (d,  $J = 8.0$  Hz, 1H), 7.16 (dd,  $J = 7.2, 4.8$  Hz, 1H), 7.05 (d,  $J = 8.4$  Hz, 1H), 3.39-3.30 (m, 1H), 2.52-2.42 (m, 2H), 1.67 (s, 3H), 1.60 (s, 3H), 1.30 (d,  $J = 6.8$  Hz, 3H);  $^{13}\text{C}$  NMR (100 MHz,  $\text{CDCl}_3$ )  $\delta$  170.0, 164.3, 153.6, 147.5, 138.7, 137.2, 133.4, 122.6, 122.0, 119.9, 119.5, 56.5, 46.3, 36.0, 27.4, 27.4, 21.5; HRMS (EI-TOF) calc. for  $\text{C}_{18}\text{H}_{21}\text{N}_3\text{O}_4$  ( $\text{M}^+$ ): 343.1532; Found: 343.1528.

### 3-(3,4-Dimethylphenyl)-N-(2-(pyridin-2-yl)propan-2-yl)butanamide (**3s**)

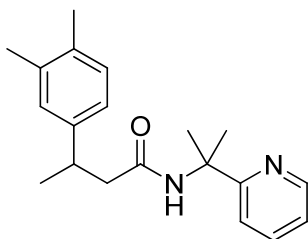

The title compound **3s** was prepared according to **GP1**. A purification by flash chromatography in petroleum ether : ethyl acetate = 1 : 1 gave **3s** as a light yellow oil (21.0 mg, 45%). <sup>1</sup>H NMR (400 MHz, CDCl<sub>3</sub>) δ 8.47 (d, *J* = 4.8 Hz, 1H), 7.64 (dt, *J* = 8.0, 1.6 Hz, 1H), 7.49 (brs, 1H), 7.27 (d, *J* = 8.4 Hz, 1H), 7.15 (dd, *J* = 6.8, 5.2 Hz, 1H), 7.07-7.03 (m, 2H), 7.00 (d, *J* = 8.0 Hz, 1H), 3.31-3.20 (m, 1H), 2.55-2.39 (ABd, 2H), 2.22 (s, 3H), 2.20 (s, 3H), 1.68 (s, 3H), 1.64 (s, 3H), 1.30 (d, *J* = 6.8 Hz, 3H); <sup>13</sup>C NMR (100 MHz, CDCl<sub>3</sub>) δ 171.1, 164.6, 147.6, 143.8, 137.0, 136.5, 134.3, 129.8, 128.4, 124.2, 121.8, 119.5, 56.5, 46.8, 36.7, 27.6, 27.4, 21.8, 19.9, 19.4; HRMS (EI-TOF) calc. for C<sub>20</sub>H<sub>26</sub>N<sub>2</sub>O (M<sup>+</sup>): 310.2045; Found: 310.2044.

### 3-(Benzo[d][1,3]dioxol-5-yl)-N-(2-(pyridin-2-yl)propan-2-yl)butanamide (**3t**)

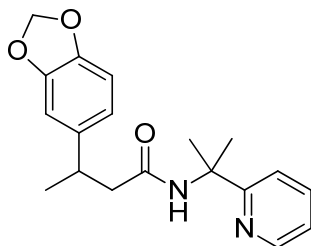

The title compound **3t** was prepared according to **GP1**. A purification by flash chromatography in dichloromethane : ethyl acetate = 2 : 1 gave **3t** as a colorless oil (25.0 mg, 51%). <sup>1</sup>H NMR (400 MHz, CDCl<sub>3</sub>) δ 8.47 (d, *J* = 4.4 Hz, 1H), 7.66 (td, *J* = 7.9, 1.7 Hz, 1H), 7.52 (s, 1H), 7.29 (d, *J* = 8.1 Hz, 1H), 7.19–7.11 (m, 1H), 6.76 (s, 1H), 6.71 (s, 2H), 5.88 (s, 2H), 3.31–3.19 (m, 1H), 2.51-2.35 (ABd, 2H), 1.68 (s, 3H), 1.63 (s, 3H), 1.27 (d, *J* = 6.9 Hz, 3H). <sup>13</sup>C NMR (100 MHz, CDCl<sub>3</sub>) δ 170.8, 164.6, 147.7, 147.6, 145.9, 140.4, 137.1, 121.8, 120.0, 119.5, 108.3, 107.5, 100.8, 56.6, 47.1, 37.0, 27.6, 27.5, 22.0. HRMS (EI-TOF) calc. for C<sub>19</sub>H<sub>22</sub>N<sub>2</sub>O<sub>3</sub> (M<sup>+</sup>): 326.1630; Found: 326.1633.

### 3-(3,4-Difluorophenyl)-N-(2-(pyridin-2-yl)propan-2-yl)butanamide (**3u**)



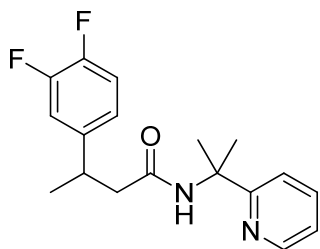

The title compound **3u** was prepared according to **GP1**. A purification by flash chromatography in petroleum ether : ethyl acetate = 1 : 4 gave **3u** as a light yellow oil (27.9 mg, 58%).  $^1\text{H}$  NMR (400 MHz,  $\text{CDCl}_3$ )  $\delta$  8.45 (d,  $J = 4.4$  Hz, 1H), 7.69-7.65 (m, 2H), 7.29 (d,  $J = 8.0$  Hz, 1H), 7.19-7.15 (m, 1H), 7.09-6.92 (m, 3H), 3.36-3.26 (m, 1H), 2.44 (d,  $J = 7.2$  Hz, 2H), 1.68 (s, 3H), 1.61 (s, 3H), 1.28 (d,  $J = 6.8$  Hz, 3H);  $^{13}\text{C}$  NMR (100 MHz,  $\text{CDCl}_3$ )  $\delta$  170.3, 164.4, 150.8 (dd,  $J = 143, 13$  Hz), 148.3 (dd,  $J = 141, 13$  Hz), 147.6, 143.3 (t,  $J = 4$  Hz), 137.2, 123.0 (dd,  $J = 6, 3$  Hz), 122.0, 119.5, 117.1 (d,  $J = 17$  Hz), 115.8 (d,  $J = 17$  Hz), 56.5, 46.7, 36.5, 27.5, 27.4, 21.7;  $^{19}\text{F}$  NMR (376 MHz,  $\text{CDCl}_3$ )  $\delta$  -138.22 ( $J = -22.4$  Hz), -141.84 ( $J = -22.8$  Hz); HRMS (EI-TOF) calc. for  $\text{C}_{18}\text{H}_{20}\text{F}_2\text{N}_2\text{O}$  ( $\text{M}^+$ ): 318.1544; Found: 318.1547.

### 3-(4-Acetylphenyl)-N-(2-(pyridin-2-yl)propan-2-yl)hexanamide (**3v**)

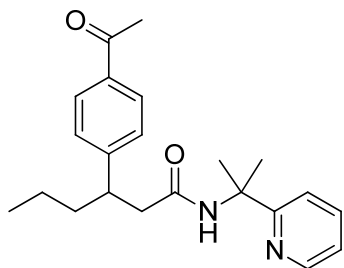

The title compound **3v** was prepared according to **GP1**. A purification by flash chromatography in petroleum ether : ethyl acetate = 1 : 1 gave **3v** as a yellow solid (46.0 mg, 87%). An alternative method according to **GP2** also gave product **3v** (54.0 mg, 77%).  $^1\text{H}$  NMR (400 MHz,  $\text{CDCl}_3$ )  $\delta$  8.48-8.42 (m, 1H), 7.87 (d,  $J = 8.3$  Hz, 2H), 7.64 (dt,  $J = 7.8, 1.8$  Hz, 1H), 7.53 (s, 1H), 7.32 (d,  $J = 8.3$  Hz, 2H), 7.24 (d,  $J = 8.1$  Hz, 1H), 7.15 (ddd,  $J = 7.4, 4.9, 0.8$  Hz, 1H), 3.29-3.18 (m, 1H), 2.62-2.56 (ABd, 1H), 2.55 (s, 3H), 2.50-2.43 (ABd, 1H), 1.75-1.59 (m, 7H), 1.53 (s, 3H), 0.85 (t,  $J = 7.3$  Hz, 3H).  $^{13}\text{C}$  NMR (100 MHz,  $\text{CDCl}_3$ )  $\delta$  198.0, 170.4, 164.5, 150.7, 147.6, 137.1, 135.5, 128.7, 128.1, 121.9, 119.5, 56.5, 45.2, 42.8, 38.3, 27.5, 27.4, 26.7, 20.7, 14.1. HRMS (EI-TOF) calc. for  $\text{C}_{22}\text{H}_{28}\text{N}_2\text{O}_2$  ( $\text{M}^+$ ): 352.2151; Found: 352.2150.

### 3-(4-Acetylphenyl)-3-phenyl-*N*-(2-(pyridin-2-yl)propan-2-yl)propanamide (3w)

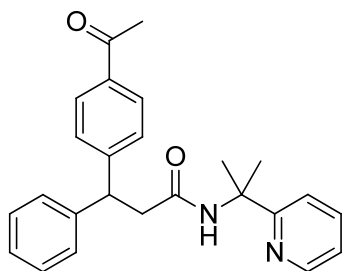

The title compound **3w** was prepared according to **GP1**. A purification by flash chromatography in petroleum ether : ethyl acetate = 2 : 3 gave **3w** as a colorless oil (46.4 mg, 80%). An alternative method according to **GP2** also gave product **3w** (47.9 mg, 62%). <sup>1</sup>H NMR (400 MHz, CDCl<sub>3</sub>) δ 8.44 (d, *J* = 4.4 Hz, 1H), 7.86 (d, *J* = 8.4 Hz, 2H), 7.67 (s, 1H), 7.66–7.60 (m, 1H), 7.38 (d, *J* = 8.2 Hz, 2H), 7.32–7.24 (m, 4H), 7.23–7.12 (m, 3H), 4.68 (t, *J* = 7.9 Hz, 1H), 3.00 (d, *J* = 7.9 Hz, 2H), 2.54 (s, 3H), 1.56 (d, *J* = 3.3 Hz, 6H). <sup>13</sup>C NMR (100 MHz, CDCl<sub>3</sub>) δ 197.9, 169.7, 164.3, 149.7, 147.6, 143.2, 137.2, 135.5, 128.8, 128.7, 128.3, 128.0, 126.8, 121.9, 119.5, 56.6, 47.6, 43.9, 27.4, 26.7. HRMS (EI-TOF) calc. for C<sub>25</sub>H<sub>26</sub>N<sub>2</sub>O<sub>2</sub> (M<sup>+</sup>): 386.1994; Found: 386.1996.

### 3-(4-Acetylphenyl)-5-methyl-*N*-(2-(pyridin-2-yl)propan-2-yl)hexanamide (3x)

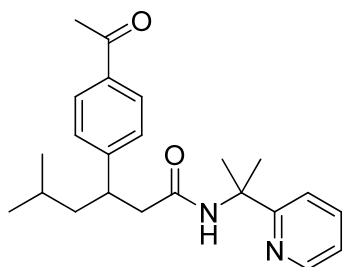

The title compound **3x** was prepared according to **GP1**. A purification by flash chromatography in petroleum ether : ethyl acetate = 2 : 3 gave **3x** as a yellow solid (49.0 mg, 89%). An alternative method according to **GP2** with an additional treatment with 0.5 mL triethylamine for 5h before filtration also gave product **3x** (59.1 mg, 81%). <sup>1</sup>H NMR (400 MHz, CDCl<sub>3</sub>) δ 8.42 (d, *J* = 4.4 Hz, 1H), 7.86 (d, *J* = 8.0 Hz, 2H), 7.62 (t, *J* = 7.6 Hz, 1H), 7.50 (brs, 1H), 7.33 (d, *J* = 8.0 Hz, 2H), 7.21 (d, *J* = 8.0 Hz, 1H), 7.14 (dd, *J* = 7.2, 5.2 Hz, 1H), 3.37-3.29 (m, 1H), 2.59-2.52 (m, 4H), 2.46-2.40 (m, 1H), 1.68-1.60 (m, 4H), 1.51-1.45 (m, 4H), 1.34-1.26 (m, 1H), 0.86 (d, *J* = 6.4 Hz, 3H), 0.82 (d, *J* = 6.4 Hz, 3H); <sup>13</sup>C NMR (100 MHz, CDCl<sub>3</sub>) δ 198.0, 170.3, 164.4, 150.7, 147.6, 137.1, 135.5, 128.7, 128.1, 121.9, 119.5, 56.5, 45.7, 45.2, 40.8, 27.5, 27.4, 26.7, 25.5, 23.6, 21.7; HRMS (EI-TOF) calc. for C<sub>23</sub>H<sub>30</sub>N<sub>2</sub>O<sub>2</sub> (M<sup>+</sup>): 366.2307; Found: 366.2313.

### 3-(4-Acetylphenyl)-6-chloro-N-(2-(pyridin-2-yl)propan-2-yl)hexanamide (3y)

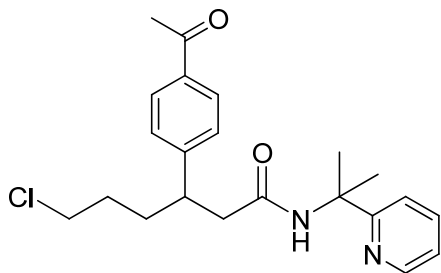

The title compound **3y** was prepared according to **GP1**. A purification by flash chromatography in petroleum ether : acetone = 2 : 1 gave **3y** as a yellow oil (41.8 mg, 72%). An alternative method according to **GP2** with an additional treatment with 0.5 mL triethylamine for 5h before filtration also gave product **3y** (40.8 mg, 53%). <sup>1</sup>H NMR (400 MHz, CDCl<sub>3</sub>) δ 8.45 (ddd, *J* = 4.8, 1.6, 0.8 Hz, 1H), 7.89 (d, *J* = 8.4 Hz, 2H), 7.68-7.64 (m, 2H), 7.34 (d, *J* = 8.4 Hz, 2H), 7.29-7.24 (m, 1H), 7.17 (ddd, *J* = 7.6, 4.8, 0.8 Hz, 1H), 3.47 (t, *J* = 6.4 Hz, 2H), 3.31-3.22 (m, 1H), 2.64-2.58 (ABd, 1H), 2.56 (s, 3H), 2.54-2.48 (ABd, 1H), 1.95-1.86 (m, 1H), 1.85-1.63 (m, 5H), 1.63-1.53 (m, 4H); <sup>13</sup>C NMR (100 MHz, CDCl<sub>3</sub>) δ 197.9, 170.0, 164.3, 149.7, 147.5, 137.2, 135.7, 128.8, 128.0, 122.0, 119.5, 56.5, 45.1, 45.0, 42.4, 33.1, 30.6, 27.5, 27.4, 26.7; HRMS (EI-TOF) calc. for C<sub>22</sub>H<sub>27</sub>ClN<sub>2</sub>O<sub>2</sub> (M<sup>+</sup>): 386.1761; Found: 386.1764.

### 3-(4-Acetylphenyl)-4-phenyl-N-(2-(pyridin-2-yl)propan-2-yl)butanamide (3z)

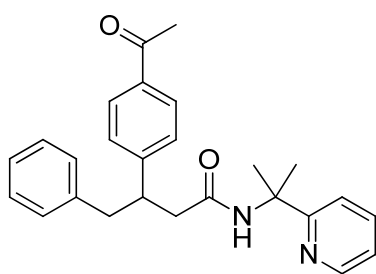

The title compound **3z** was prepared according to **GP1**. A purification by flash chromatography in petroleum ether : ethyl acetate = 1 : 1 gave **3z** as a yellow solid (50.0 mg, 83%). An alternative method according to **GP2** also gave product **3z** (63.1 mg, 79%). <sup>1</sup>H NMR (400 MHz, CDCl<sub>3</sub>) δ 8.44 (d, *J* = 4.3 Hz, 1H), 7.82 (d, *J* = 8.3 Hz, 2H), 7.68-7.57 (m, 2H), 7.29-7.21 (m, 3H), 7.20-7.10 (m, 4H), 7.07-6.99 (m, 2H), 3.64-3.50 (m, 1H), 3.06-3.00 (m, 1H), 2.96-2.87 (m, 1H), 2.70-2.62 (m, 1H), 2.60-2.49 (m, 4H), 1.62 (s, 3H), 1.53 (s, 3H). <sup>13</sup>C NMR (100 MHz, CDCl<sub>3</sub>) δ 198.0, 170.1, 164.4, 149.7, 147.6, 139.4, 137.2, 135.6, 129.3, 128.5, 128.3, 128.2, 126.3, 121.9, 119.5, 56.6, 44.7,

43.7, 42.5, 27.5, 27.4, 26.7. HRMS (EI-TOF) calc. for  $C_{26}H_{28}N_2O_2$  ( $M^+$ ): 400.2151; Found: 400.2146.

**3-(4-Acetylphenyl)-6-(1,3-dioxisoindolin-2-yl)-N-(2-(pyridin-2-yl)propan-2-yl)hexanamide**  
**(3aa)**

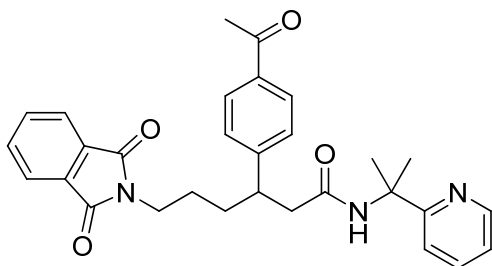

The title compound **3aa** was prepared according to **GP1**. A purification by flash chromatography in petroleum ether : acetone = 5 : 3 gave **3aa** as a yellow solid (13.3 mg, 23%). An alternative method according to **GP2** with an additional treatment with 0.5 mL triethylamine for 5h before filtration also gave product **3aa** (84.6 mg, 85%).  $^1H$  NMR (400 MHz,  $CDCl_3$ )  $\delta$  8.41 (d,  $J$  = 4.4 Hz, 1H), 7.82 (d,  $J$  = 8.0 Hz, 2H), 7.77-7.74 (m, 2H), 7.67-7.64 (m, 2H), 7.63-7.57 (m, 2H), 7.29 (d,  $J$  = 8.0 Hz, 2H), 7.20 (d,  $J$  = 8.0 Hz, 1H), 7.12 (dd,  $J$  = 7.2, 4.8 Hz, 1H), 3.66-3.54 (m, 2H), 3.27-3.19 (m, 1H), 2.61-2.43 (m, 5H), 1.77-1.65 (m, 2H), 1.63-1.54 (m, 4H), 1.49-1.41 (m, 4H);  $^{13}C$  NMR (100 MHz,  $CDCl_3$ )  $\delta$  197.9, 169.9, 168.3, 164.2, 149.7, 147.5, 137.1, 135.6, 133.9, 132.1, 128.7, 128.0, 123.2, 121.8, 119.4, 56.4, 44.8, 42.6, 37.8, 33.0, 27.4, 27.3, 26.6, 26.6; HRMS (EI-TOF) calc. for  $C_{30}H_{31}N_3O_4$  ( $M^+$ ): 497.2315; Found: 497.2320.

**3-(4-Acetylphenyl)-4-(1-methyl-1H-indol-3-yl)-N-(2-(pyridin-2-yl)propan-2-yl)butanamide**  
**(3ab)**

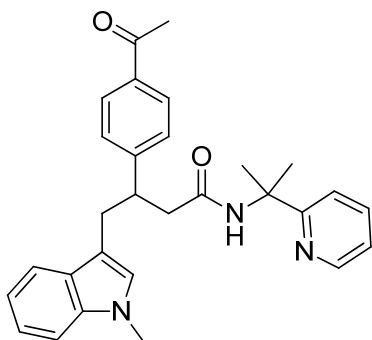

The title compound **3ab** was prepared according to **GP1**. A purification by flash chromatography in

petroleum ether : ethyl acetate = 1 : 1 gave **3ab** as a yellow oil (22.0 mg, 32%). An alternative method according to **GP2** also gave product **3ab** (48.4 mg, 53%). <sup>1</sup>H NMR (400 MHz, CDCl<sub>3</sub>) δ 8.45-8.41 (m, 1H), 7.83 (d, *J* = 8.3 Hz, 2H), 7.62 (dt, *J* = 6.4, 3.2 Hz, 1H), 7.58 – 7.49 (m, 2H), 7.33 (d, *J* = 8.3 Hz, 2H), 7.26–7.21 (m, 2H), 7.21–7.16 (m, 1H), 7.15–7.11 (m, 1H), 7.09–7.02 (m, 1H), 6.65 (s, 1H), 3.73–3.63 (m, 4H), 3.20-3.03 (ABd, 2H), 2.78–2.71 (m, 1H), 2.61–2.50 (m, 4H), 1.62 (s, 3H), 1.54 (s, 3H). <sup>13</sup>C NMR (100 MHz, CDCl<sub>3</sub>) δ 198.2, 170.5, 164.4, 150.7, 147.6, 137.1, 137.0, 135.5, 128.6, 128.2, 128.1, 127.4, 121.9, 121.6, 119.5, 119.1, 118.9, 112.0, 109.2, 56.6, 44.0, 43.7, 32.7, 31.9, 27.5, 27.4, 26.7. HRMS (EI-TOF) calc. for C<sub>29</sub>H<sub>31</sub>N<sub>3</sub>O<sub>2</sub> (M<sup>+</sup>): 453.2416; Found: 453.2418.

### 2,4-Bis(4-acetylphenyl)-*N*-(2-(pyridin-2-yl)propan-2-yl)cyclobutanecarboxamide (**3ac**)

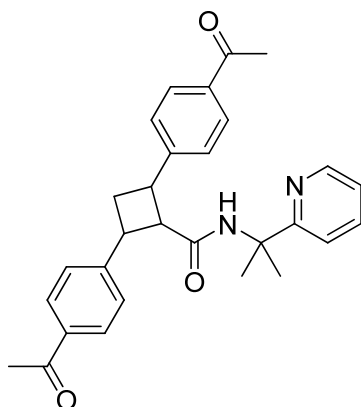

The title compound **3ac** was prepared according to **GP1**. A purification by flash chromatography in dichloromethane : ethyl acetate = 1 : 1 gave **3ac** as a yellow solid (26.0 mg, 38%). An alternative method according to **GP2** with an additional treatment with 0.5 mL triethylamine for 5h before filtration (dichloromethane was applied in the dilution before filtration instead of ethyl acetate due to bad solubility) also gave product **3ac** (62.7 mg, 69%). <sup>1</sup>H NMR (400 MHz, CDCl<sub>3</sub>) δ 8.41 (d, *J* = 4.4 Hz, 1H), 7.83 (d, *J* = 8.0 Hz, 4H), 7.68 (brs, 1H), 7.53 (t, *J* = 8.0 Hz, 1H), 7.34 (d, *J* = 8.4 Hz, 4H), 7.12-7.08 (m, 1H), 7.03 (d, *J* = 8.0 Hz, 1H), 4.02-3.89 (m, 3H), 3.48 (q, *J* = 10.4 Hz, 1H), 2.74-2.67 (m, 1H), 2.54 (s, 6H), 1.15 (s, 6H); <sup>13</sup>C NMR (100 MHz, CDCl<sub>3</sub>) δ 198.1, 168.6, 164.3, 147.3, 147.1, 137.0, 135.0, 128.1, 127.3, 121.8, 119.5, 56.3, 53.6, 38.5, 29.6, 27.0, 26.7; HRMS (EI-TOF) calc. for C<sub>29</sub>H<sub>30</sub>N<sub>2</sub>O<sub>3</sub> (M<sup>+</sup>): 454.2256; Found: 454.2260.

### 2-(4-Acetylphenyl)-*N*-(2-(pyridin-2-yl)propan-2-yl)cyclopropanecarboxamide (**3ad**)

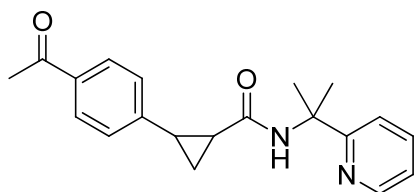

The title compound **3ad** was prepared according to **GP2**. A purification by flash chromatography in petroleum ether : ethyl acetate = 1 : 3 gave **3ad** as a light yellow solid (38.9 mg, 60%). <sup>1</sup>H NMR (400 MHz, CDCl<sub>3</sub>) δ 4.45 (dd, *J* = 4.8, 0.8 Hz, 1H), 7.79 (d, *J* = 8.4 Hz, 2H), 7.76 (brs, 1H), 7.58 (dt, *J* = 8.0, 1.6 Hz, 1H), 7.33 (d, *J* = 8.4 Hz, 2H), 7.18 (d, *J* = 8.0 Hz, 1H), 7.12 (ddd, *J* = 7.2, 4.8, 0.8 Hz, 1H), 2.53 (s, 3H), 2.50-2.42 (m, 1H), 2.15-2.08 (m, 1H), 1.78-1.72 (m, 1H), 1.54 (s, 3H), 1.41 (s, 3H), 1.31-1.23 (m, 1H); <sup>13</sup>C NMR (100 MHz, CDCl<sub>3</sub>) δ 198.1, 167.8, 164.4, 147.6, 143.4, 137.1, 135.2, 129.4, 127.9, 121.8, 119.5, 55.6, 27.6, 27.4, 26.7, 25.2, 24.4, 10.0; HRMS (EI-TOF) calc. for C<sub>20</sub>H<sub>22</sub>N<sub>2</sub>O<sub>2</sub> (M<sup>+</sup>): 322.1681; Found: 322.1671.

### 3-(4-Acetylphenyl)-4-(4-fluorophenyl)-*N*-(2-(pyridin-2-yl)propan-2-yl)butanamide (**3ae**)

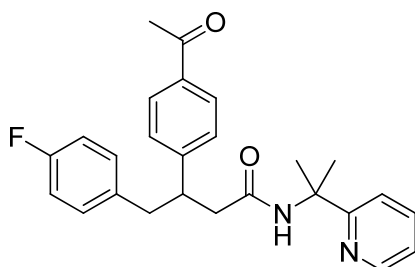

The title compound **3ae** was prepared according to **GP2** with an additional treatment with 0.5 mL triethylamine for 5h before filtration. A purification by flash chromatography in petroleum ether : ethyl acetate = 1 : 2 gave **3ae** as a light yellow solid (71.6 mg, 86%). <sup>1</sup>H NMR (400 MHz, CDCl<sub>3</sub>) δ 8.42 (d, *J* = 4.4 Hz, 1H), 7.81 (d, *J* = 8.0 Hz, 2H), 7.67-7.60 (m, 2H), 7.24-7.21 (m, 3H), 7.14 (dd, *J* = 6.8, 5.2 Hz, 1H), 6.94 (dd, *J* = 8.4, 6.0 Hz, 2H), 6.83 (t, *J* = 8.8 Hz, 2H), 3.55-3.47 (m, 1H), 3.04-2.98 (ABd, 1H), 2.89-2.82 (ABd, 1H), 2.67-2.61 (m, 1H), 2.58-2.50 (m, 4H), 1.62 (s, 3H), 1.53 (s, 3H); <sup>13</sup>C NMR (100 MHz, CDCl<sub>3</sub>) δ 198.0, 170.0, 164.2, 161.4 (d, *J* = 243 Hz), 149.3, 147.5, 137.1, 135.5, 135.0 (d, *J* = 3 Hz), 130.6 (d, *J* = 8 Hz), 128.5, 128.1, 121.9, 119.4, 115.0 (d, *J* = 21 Hz), 56.5, 44.7, 43.5, 41.5, 27.5, 27.3, 26.6; <sup>19</sup>F NMR (376 MHz, CDCl<sub>3</sub>) δ -117.06; HRMS (EI-TOF) calc. for C<sub>26</sub>H<sub>27</sub>FN<sub>2</sub>O<sub>2</sub> (M<sup>+</sup>): 418.2057; Found: 418.2059.

### 3-(4-Acetylphenyl)-4-methyl-*N*-(2-(pyridin-2-yl)propan-2-yl)pentanamide (**3af**)

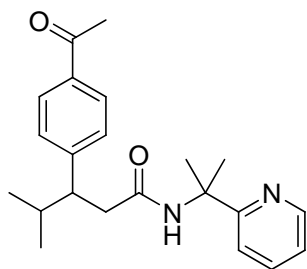

The title compound **3af** was prepared according to **GP2**. A purification by flash chromatography in petroleum ether : ethyl acetate = 1 : 2 gave **3af** as a colorless oil (38.0 mg, 54%). An application of AgF (38.1 mg, 0.3 mmol) in **GP2** instead of AgOAc and an additional treatment with 0.5 mL triethylamine for 5h before filtration also gave product **3af** (50.0 mg, 71%). <sup>1</sup>H NMR (400 MHz, CDCl<sub>3</sub>) δ 8.43 (d, *J* = 4.4 Hz, 1H), 7.84 (d, *J* = 8.0 Hz, 2H), 7.59 (t, *J* = 8.0 Hz, 1H), 7.49 (brs, 1H), 7.30 (d, *J* = 8.0 Hz, 2H), 7.18–7.11 (m, 2H), 3.04–2.93 (m, 1H), 2.82–2.74 (ABd, 1H), 2.53 (s, 3H), 2.52–2.42 (ABd, 1H), 1.99–1.83 (m, 1H), 1.55 (s, 3H), 1.42 (s, 3H), 0.99 (d, *J* = 6.4 Hz, 3H), 0.75 (d, *J* = 6.8 Hz, 3H); <sup>13</sup>C NMR (100 MHz, CDCl<sub>3</sub>) δ 198.1, 170.7, 164.4, 149.6, 147.5, 137.1, 135.4, 128.8, 128.3, 121.9, 119.4, 56.4, 49.9, 42.0, 33.2, 27.4, 27.3, 26.7, 20.9, 20.7; HRMS (EI-TOF) calc. for C<sub>22</sub>H<sub>28</sub>N<sub>2</sub>O<sub>2</sub> (M<sup>+</sup>): 352.2151; Found: 352.2152.

### 3-(4-Acetylphenyl)-4-(1,3-dioxoisindolin-2-yl)-N-(2-(pyridin-2-yl)propan-2-yl)butanamide (3ag)

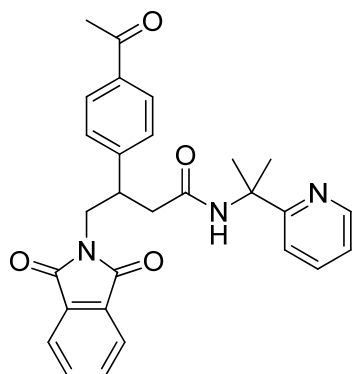

The title compound **3ag** was prepared according to **GP2** with an additional treatment with 0.5 mL triethylamine for 5h before filtration. A purification by flash chromatography in petroleum ether : acetone = 5 : 3 gave **3ag** as a white solid (37.6 mg, 40%). <sup>1</sup>H NMR (400 MHz, CDCl<sub>3</sub>) δ 8.43 (d, *J* = 4.4 Hz, 1H), 7.84 (d, *J* = 8.0 Hz, 2H), 7.81-7.72 (m, 2H), 7.71-7.64 (m, 3H), 7.61 (t, *J* = 7.6 Hz, 1H), 7.41 (d, *J* = 8.4 Hz, 2H), 7.20 (d, *J* = 8.0 Hz, 1H), 7.13 (dd, *J* = 6.8, 5.6 Hz, 1H), 4.05-3.76 (m, 3H), 2.79-2.68 (ABd, 1H), 2.68-2.58 (ABd, 1H), 2.52 (s, 3H), 1.52 (s, 3H), 1.47 (s, 3H); <sup>13</sup>C NMR (100 MHz, CDCl<sub>3</sub>) δ 197.9, 169.3, 168.3, 164.2, 147.6, 146.7, 137.1, 136.1, 134.1, 131.9, 128.7,

128.3, 123.4, 121.9, 119.4, 56.6, 42.9, 41.7, 41.5, 27.4, 27.3, 26.7; HRMS (EI-TOF) calc. for  $C_{28}H_{27}N_3O_4$  ( $M^+$ ): 469.2002; Found: 469.2000.

### 3-(4-Bromophenyl)-*N*-(2-(pyridin-2-yl)propan-2-yl)butanamide (3ah)

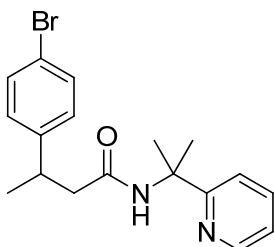

The title compound **3ah** was prepared according to **GP2**. A purification by flash chromatography in petroleum ether : ethyl acetate = 2 : 5 gave **3ah** as a colorless oil (61.9 mg, 86%).  $^1H$  NMR (400 MHz,  $CDCl_3$ )  $\delta$  8.47 (d,  $J$  = 4.8 Hz, 1H), 7.67 (dt,  $J$  = 8.4, 1.2 Hz, 1H), 7.61 (brs, 1H), 7.39 (d,  $J$  = 8.4 Hz, 2H), 7.27 (d,  $J$  = 8.0 Hz, 1H), 7.19-7.13 (m, 3H), 3.36-3.26 (m, 1H), 2.52-2.42 (ABd, 2H), 1.68 (s, 3H), 1.63 (s, 3H), 1.30 (d,  $J$  = 6.8 Hz, 3H);  $^{13}C$  NMR (100 MHz,  $CDCl_3$ )  $\delta$  170.4, 164.4, 147.6, 145.3, 137.1, 131.5, 128.9, 121.9, 119.9, 119.5, 56.5, 46.5, 36.5, 27.6, 27.4, 21.6; HRMS (EI-TOF) calc. for  $C_{18}H_{21}BrN_2O$  ( $M^+$ ): 360.0837; Found: 360.0843.

### 3-(3-Fluoro-4-nitrophenyl)-*N*-(2-(pyridin-2-yl)propan-2-yl)butanamide (3ai)

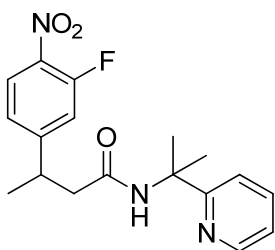

The title compound **3ai** was prepared according to **GP1**. A purification by flash chromatography in petroleum ether : ethyl acetate = 1 : 3 gave **3ai** as a yellow solid (12.0 mg, 23%). An alternative method according to **GP2** also gave product **3ai** (51.6 mg, 75%).  $^1H$  NMR (400 MHz,  $CDCl_3$ )  $\delta$  8.45 (d,  $J$  = 4.8 Hz, 1H), 7.98 (t,  $J$  = 8.0 Hz, 1H), 7.79 (brs, 1H), 7.69 (dt,  $J$  = 7.6, 0.8 Hz, 1H), 7.32 (d,  $J$  = 8.0 Hz, 1H), 7.20-7.16 (m, 3H), 3.50-3.40 (m, 1H), 2.57-2.46 (ABd, 2H), 1.69 (s, 3H), 1.61 (s, 3H), 1.34 (d,  $J$  = 6.8 Hz, 3H);  $^{13}C$  NMR (100 MHz,  $CDCl_3$ )  $\delta$  169.5, 164.2, 156.1 (d,  $J$  = 8 Hz), 155.6 (d,  $J$  = 263 Hz), 147.5, 137.4, 135.5 (d,  $J$  = 7 Hz), 126.3 (d,  $J$  = 2 Hz), 123.4 (d,  $J$  = 4 Hz), 122.1, 119.6, 116.9 (d,  $J$  = 21 Hz), 56.6, 45.8, 36.9, 27.5, 27.4, 21.2;  $^{19}F$  NMR (376 MHz,  $CDCl_3$ )  $\delta$



-117.14; HRMS (EI-TOF) calc. for  $C_{18}H_{20}FN_3O_3$  ( $M^+$ ): 345.1489; Found: 345.1495.

### 3-(3,5-Bis(trifluoromethyl)phenyl)-N-(2-(pyridin-2-yl)propan-2-yl)butanamide (3aj)

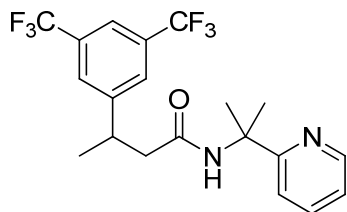

The title compound **3aj** was prepared according to **GP2**. A purification by flash chromatography in petroleum ether : ethyl acetate = 2 : 3 gave **3aj** as a white solid (64.7 mg, 77%).  $^1H$  NMR (400 MHz,  $CDCl_3$ )  $\delta$  8.43 (d,  $J$  = 4.8 Hz, 1H), 7.82 (brs, 1H), 7.71 (s, 2H), 7.69-7.65 (m, 2H), 7.30 (d,  $J$  = 8.0 Hz, 1H), 7.16 (dd,  $J$  = 7.6, 4.8 Hz, 1H), 3.56-3.47 (m, 1H), 2.59-2.47 (m, 2H), 1.67 (s, 3H), 1.55 (s, 3H), 1.37 (d,  $J$  = 6.8 Hz, 3H);  $^{13}C$  NMR (100 MHz,  $CDCl_3$ )  $\delta$  169.6, 164.2, 148.7, 147.5, 137.3, 131.7 (q,  $J$  = 33 Hz), 127.5, 123.5 (q,  $J$  = 271 Hz), 122.0, 120.4 (m,  $J$  = 4 Hz), 119.5, 56.5, 46.3, 36.9, 27.3, 21.3;  $^{19}F$  NMR (376 MHz,  $CDCl_3$ )  $\delta$  -62.81; HRMS (EI-TOF) calc. for  $C_{20}H_{20}F_6N_2O$  ( $M^+$ ): 418.1480; Found: 418.1487.

### 2-Nitro-4-(4-oxo-4-(2-(pyridin-2-yl)propan-2-ylamino)butan-2-yl)phenyl benzoate (3ak)

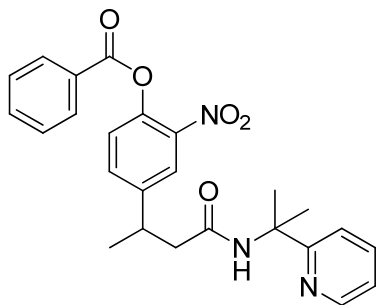

The title compound **3ak** was prepared according to **GP2**. A purification by flash chromatography in ethyl acetate gave **3ak** as a colorless oil (78.5 mg, 88%).  $^1H$  NMR (400 MHz,  $CDCl_3$ )  $\delta$  8.48 (d,  $J$  = 4.4 Hz, 1H), 8.18 (d,  $J$  = 7.2 Hz, 2H), 8.04 (d,  $J$  = 1.2 Hz, 1H), 7.80 (brs, 1H), 7.71-7.60 (m, 3H), 7.51 (t,  $J$  = 8.0 Hz, 2H), 7.33 (d,  $J$  = 8.0 Hz, 1H), 7.28 (d,  $J$  = 8.0 Hz, 1H), 7.18 (dd,  $J$  = 6.8, 5.6 Hz, 1H), 3.55-3.45 (m, 1H), 2.55 (d,  $J$  = 7.6 Hz, 2H), 1.71 (s, 3H), 1.65 (s, 3H), 1.38 (d,  $J$  = 7.2 Hz, 3H);  $^{13}C$  NMR (100 MHz,  $CDCl_3$ )  $\delta$  169.8, 164.5, 164.2, 147.6, 145.6, 142.5, 141.7, 137.2, 134.1, 133.8, 130.5, 128.7, 128.6, 125.2, 124.0, 122.0, 119.5, 56.6, 46.1, 36.3, 27.5, 27.4, 21.3; HRMS (EI-TOF) calc. for  $C_{25}H_{25}N_3O_5$  ( $M^+$ ): 447.1794; Found: 447.1784.

### 2-Methoxy-5-(4-oxo-4-(2-(pyridin-2-yl)propan-2-ylamino)butan-2-yl)phenyl acetate (**3al**)

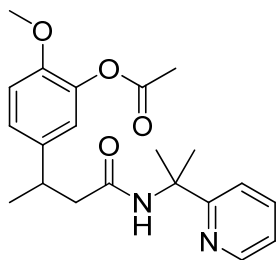

The title compound **3al** was prepared according to **GP2**. A purification by flash chromatography in ethyl acetate gave **3al** as a colorless oil (66.4 mg, 90%).  $^1\text{H}$  NMR (400 MHz,  $\text{CDCl}_3$ )  $\delta$  8.47 (d,  $J = 4.4$  Hz, 1H), 7.66 (t,  $J = 7.6$  Hz, 1H), 7.52 (brs, 1H), 7.29 (d,  $J = 7.2$  Hz, 1H), 7.16 (dd,  $J = 6.8, 5.2$  Hz, 1H), 7.09 (dd,  $J = 8.4, 1.6$  Hz, 1H), 6.96 (d,  $J = 1.6$  Hz, 1H), 6.88 (d,  $J = 8.4$  Hz, 1H), 3.78 (s, 3H), 3.35-3.22 (m, 1H), 2.52-2.37 (ABd, 2H), 2.29 (s, 3H), 1.68 (s, 3H), 1.64 (s, 3H), 1.29 (d,  $J = 7.2$  Hz, 3H);  $^{13}\text{C}$  NMR (100 MHz,  $\text{CDCl}_3$ )  $\delta$  170.7, 169.1, 164.5, 149.4, 147.6, 139.6, 139.0, 137.0, 125.3, 121.8, 121.2, 119.5, 112.3, 56.5, 56.0, 46.8, 36.1, 27.5, 27.5, 21.5, 20.8; HRMS (EI-TOF) calc. for  $\text{C}_{21}\text{H}_{26}\text{N}_2\text{O}_4$  ( $\text{M}^+$ ): 370.1893; Found: 370.1888.

### 2-Methoxy-3-methyl-5-(4-oxo-4-(2-(pyridin-2-yl)propan-2-ylamino)butan-2-yl)phenyl 4-methylbenzenesulfonate (**3am**)

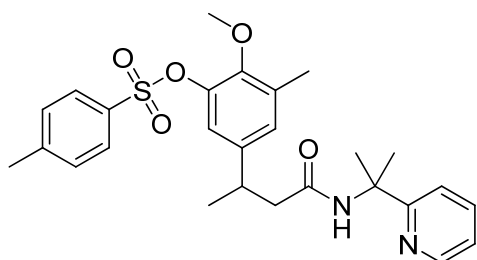

The title compound **3am** was prepared according to **GP2**. A purification by flash chromatography in petroleum ether : ethyl acetate = 1 : 3 gave **3am** as a light yellow oil (80.4 mg, 81%).  $^1\text{H}$  NMR (400 MHz,  $\text{CDCl}_3$ )  $\delta$  8.48 (d,  $J = 4.8$  Hz, 1H), 7.76 (d,  $J = 8.0$  Hz, 2H), 7.66 (dt,  $J = 8.0, 1.2$  Hz, 1H), 7.58 (brs, 1H), 7.29 (t,  $J = 8.4$  Hz, 3H), 7.16 (dd,  $J = 7.6, 5.2$  Hz, 1H), 6.95 (s, 1H), 6.74 (d,  $J = 1.6$  Hz, 1H), 3.64 (s, 3H), 3.23-3.13 (m, 1H), 2.44 (s, 3H), 2.42-2.32 (ABd, 2H), 2.17 (s, 3H), 1.68 (s, 3H), 1.62 (s, 3H), 1.20 (d,  $J = 6.8$  Hz, 3H);  $^{13}\text{C}$  NMR (100 MHz,  $\text{CDCl}_3$ )  $\delta$  170.5, 164.4, 149.0, 147.6, 145.3, 142.4, 141.8, 137.1, 133.2, 132.8, 129.6, 128.6, 128.5, 121.8, 119.4, 119.2, 60.6, 56.5, 46.5, 36.3, 27.5, 27.4, 21.8, 21.4, 16.1; HRMS (EI-TOF) calc. for  $\text{C}_{27}\text{H}_{32}\text{N}_2\text{O}_5\text{S}$  ( $\text{M}^+$ ): 496.2032;

Found: 496.2038.

***N*-(2-(Pyridin-2-yl)propan-2-yl)-3-(thiophen-2-yl)butanamide (3an)**

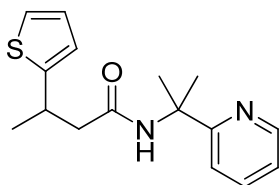

The title compound **3an** was prepared according to **GP2**. A purification by flash chromatography in petroleum ether : ethyl acetate = 2 : 3 gave **3an** as a colorless oil (51.2 mg, 89%). <sup>1</sup>H NMR (400 MHz, CDCl<sub>3</sub>) δ 8.47 (d, *J* = 4.4 Hz, 1H), 7.67 (dt, *J* = 7.6, 1.6 Hz, 1H), 7.63 (brs, 1H), 7.31 (d, *J* = 8.4 Hz, 1H), 7.16 (dd, *J* = 7.2, 5.2 Hz, 1H), 7.11 (d, *J* = 4.8 Hz, 1H), 6.89 (dd, *J* = 4.8, 3.6 Hz, 1H), 6.85 (d, *J* = 3.2 Hz, 1H), 3.70-3.60 (m, 1H), 2.63-2.44 (ABd, 2H), 1.71 (s, 3H), 1.67 (s, 3H), 1.39 (d, *J* = 6.8 Hz, 3H); <sup>13</sup>C NMR (100 MHz, CDCl<sub>3</sub>) δ 170.4, 164.5, 150.4, 147.6, 137.1, 126.6, 123.2, 122.9, 121.9, 119.5, 56.6, 47.5, 32.6, 27.5, 27.5, 22.6; HRMS (EI-TOF) calc. for C<sub>16</sub>H<sub>20</sub>N<sub>2</sub>OS (M<sup>+</sup>): 288.1296; Found: 288.1299.

***N*-(2-(Pyridin-2-yl)propan-2-yl)-3-(pyridin-4-yl)butanamide (3ao)**

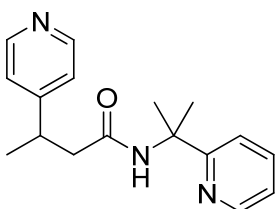

The title compound **3ao** was prepared according to **GP2** with an additional treatment with 0.5 mL triethylamine for 5h before filtration. A purification by flash chromatography in petroleum ether : acetone = 1 : 2 gave **3ao** as a white solid (28.7 mg, 51%). <sup>1</sup>H NMR (400 MHz, CDCl<sub>3</sub>) δ 8.49-8.43 (m, 3H), 7.72 (brs, 1H), 7.66 (dt, *J* = 8.0, 1.6 Hz, 1H), 7.29 (d, *J* = 8.4 Hz, 1H), 7.19-7.13 (m, 3H), 3.38-3.28 (m, 1H), 2.54-2.43 (ABd, 2H), 1.67 (s, 3H), 1.60 (s, 3H), 1.31 (d, *J* = 7.2 Hz, 3H); <sup>13</sup>C NMR (100 MHz, CDCl<sub>3</sub>) δ 170.0, 164.3, 155.2, 149.9, 147.6, 137.2, 122.6, 122.0, 119.5, 56.6, 45.7, 36.4, 27.5, 27.4, 20.9; HRMS (EI-TOF) calc. for C<sub>17</sub>H<sub>21</sub>N<sub>3</sub>O (M<sup>+</sup>): 283.1685; Found: 283.1683.

## Cleavage of Directing Group

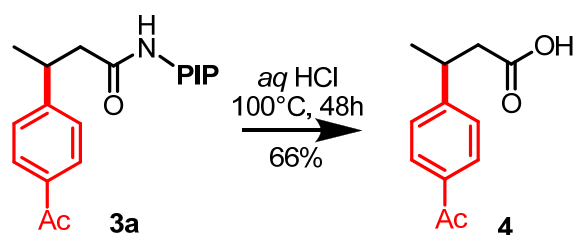

To a 25 mL round bottom flask equipped with a reflux condenser were added **3a** (38.5 mg, 0.12 mmol) and aq. HCl (6M, 10 mL). The tube was heated at 100°C for 48h. After cooling to room temperature, the reaction mixture was extracted with dichloromethane for 3 times. The combined organic phase was dried with MgSO<sub>4</sub>, filtered and concentrated. The residue was purified by flash chromatography using dichloromethane : methanol = 10 : 1 as eluent and **4** was obtained as a white solid (16.0 mg, 66%). <sup>1</sup>H NMR (400 MHz, CDCl<sub>3</sub>) δ 7.90 (d, J = 8.0 Hz, 2H), 7.32 (d, J = 8.4 Hz, 2H), 3.38-3.28 (m, 1H), 2.71-2.57 (m, 5H), 1.33 (d, J = 7.2 Hz, 3H); <sup>13</sup>C NMR (100 MHz, CDCl<sub>3</sub>) δ 198.0, 177.3, 151.2, 135.8, 128.9, 127.2, 42.1, 36.3, 26.7, 21.9; HRMS (ESI-TOF) calc. for C<sub>12</sub>H<sub>14</sub>O<sub>3</sub> (M<sup>+</sup>): 206.0943; Found: 206.0948.

## References

- [1] K. M. Yager, E. A. Plaza, D. V. Kumar and I. C. Kim, US Pat., 20080207573 A1.
- [2] F-J. Chen, S. Zhao, F. Hu, K. Chen, Q. Zhang, S-Q. Zhang and B-F. Shi, *Chem. Sci.*, 2013, **4**, 4187

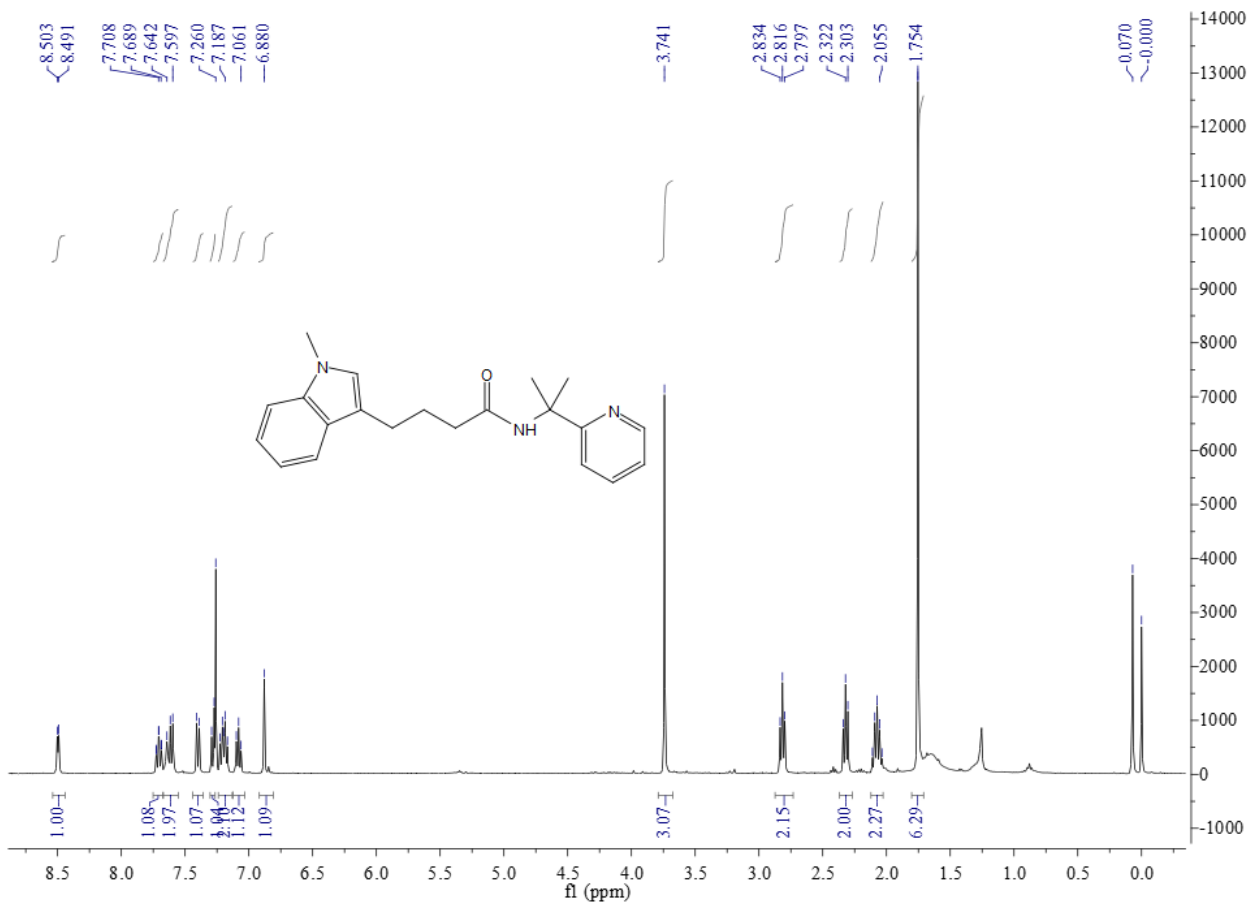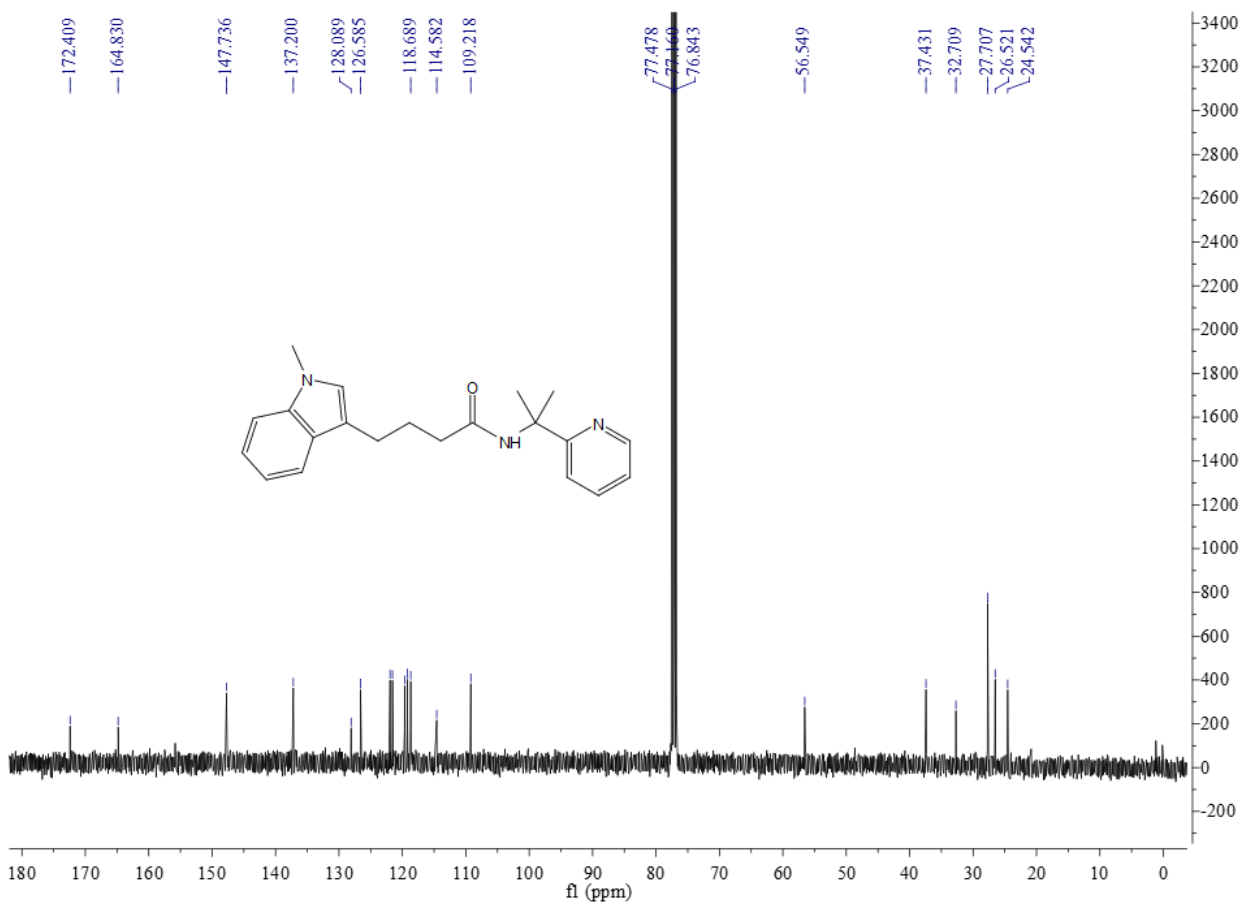

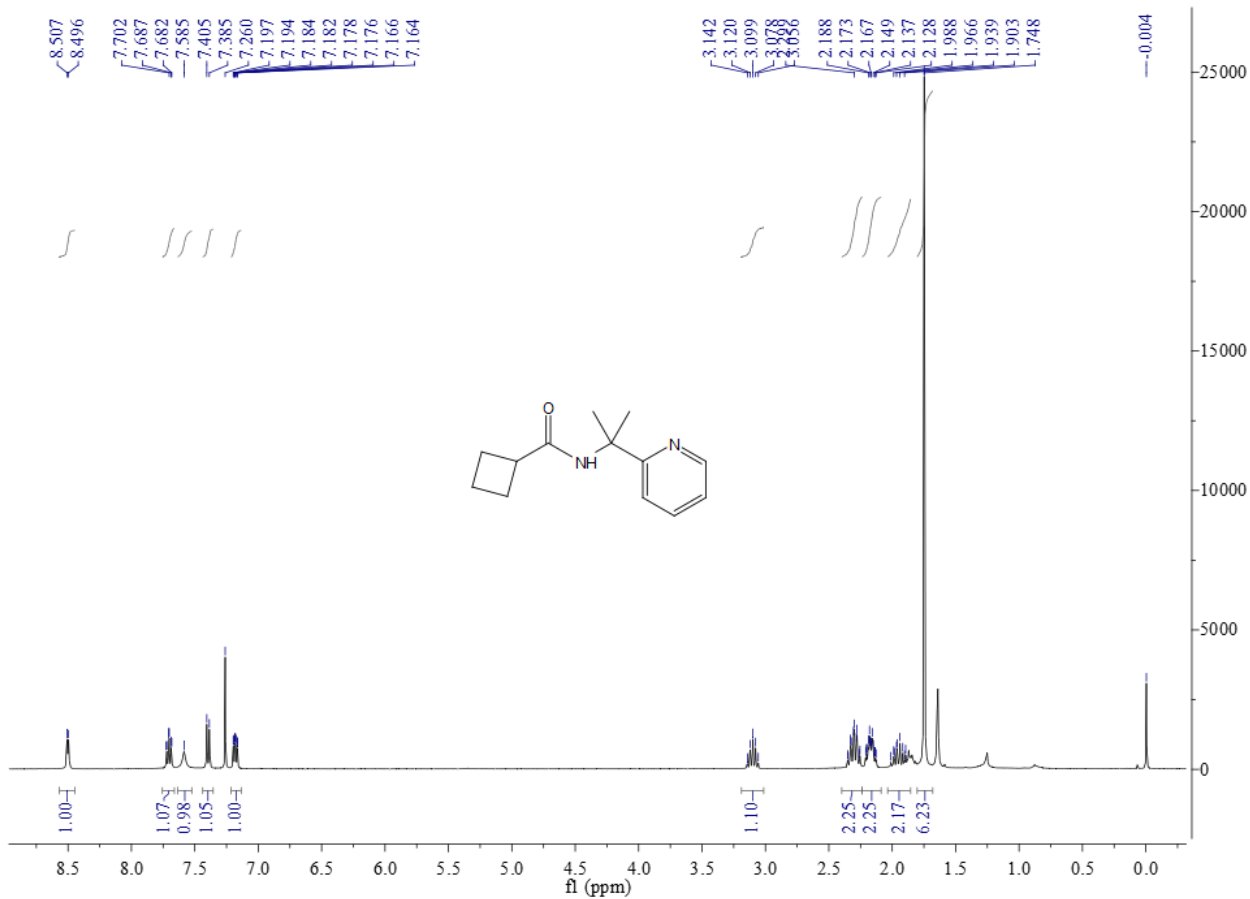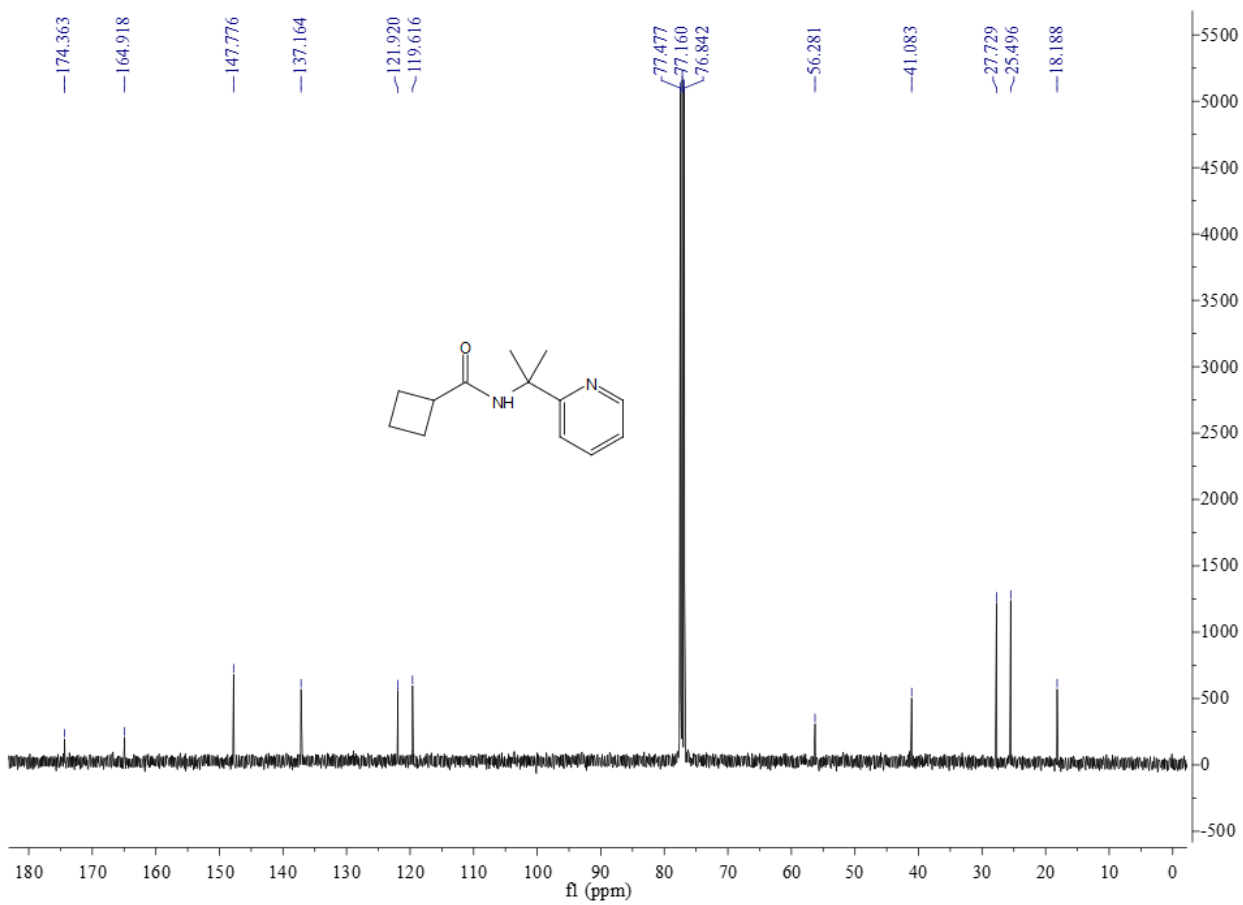

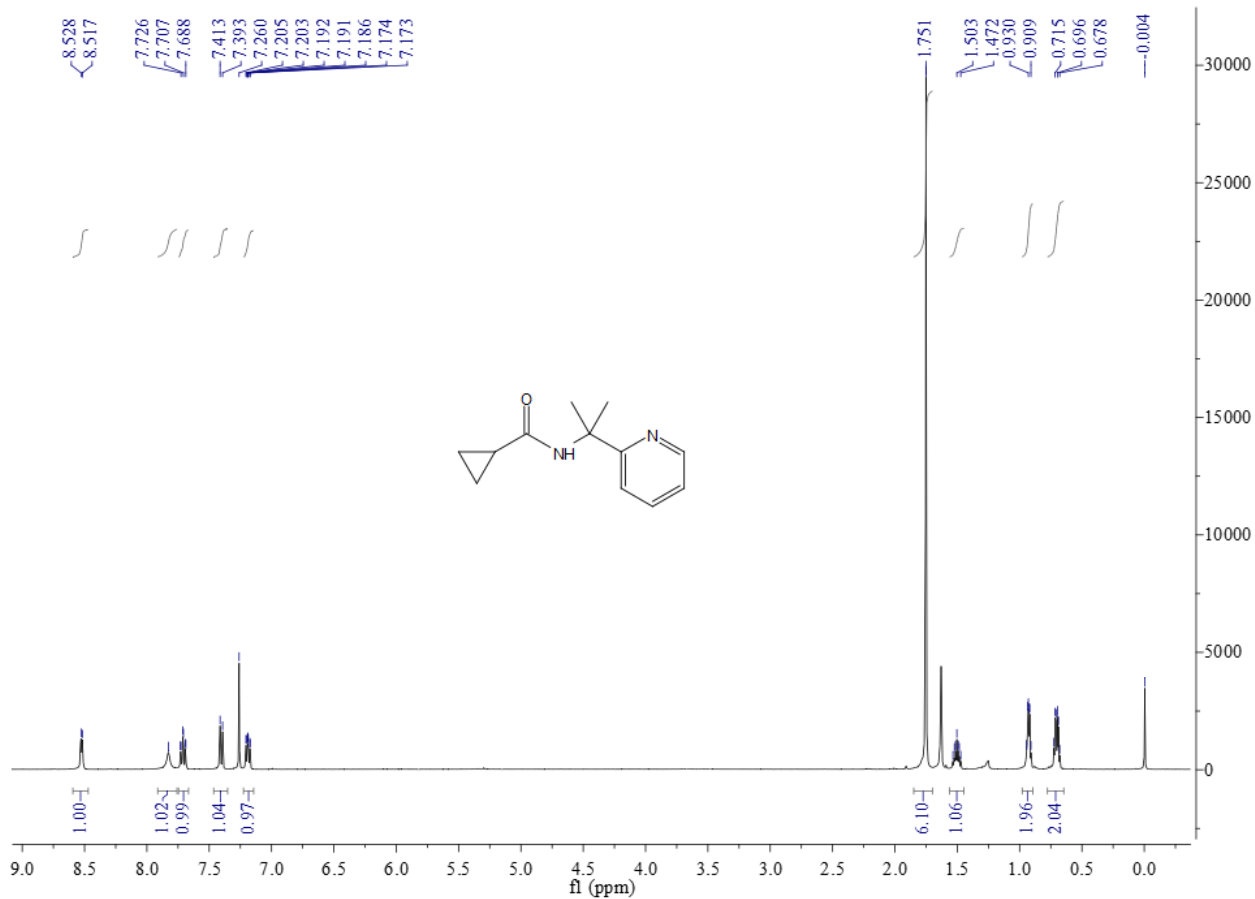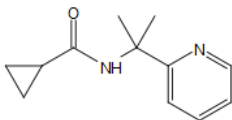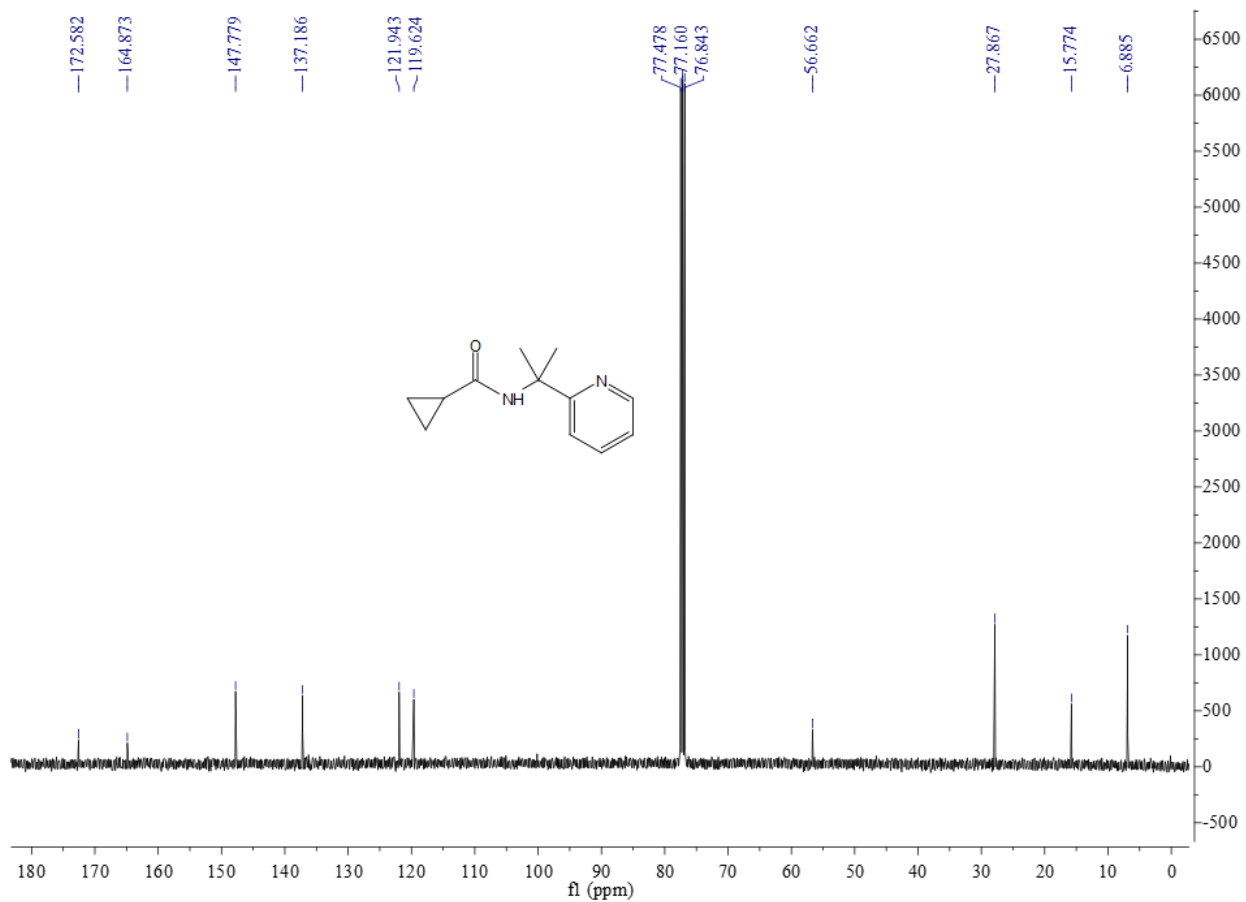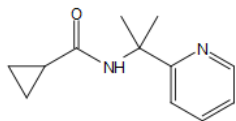

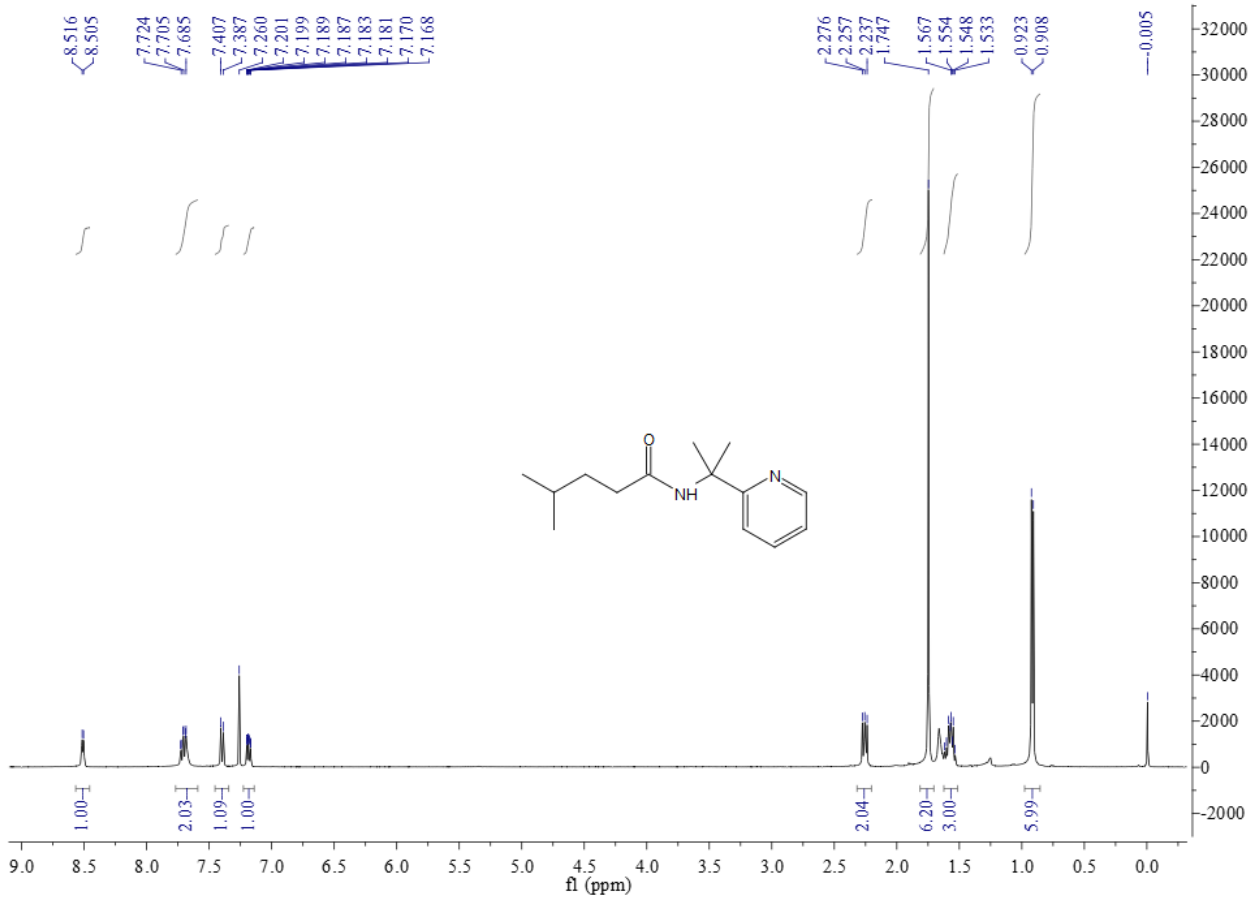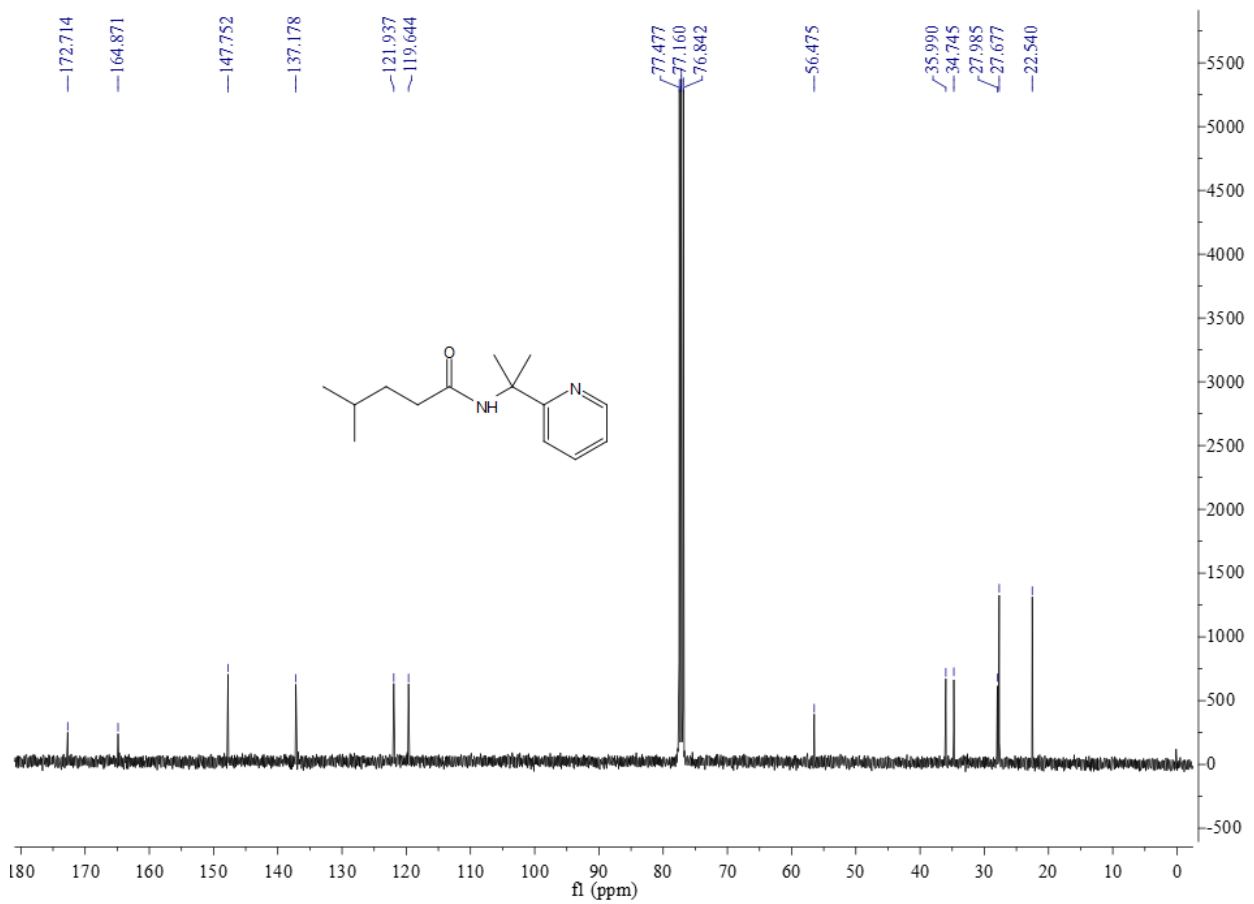



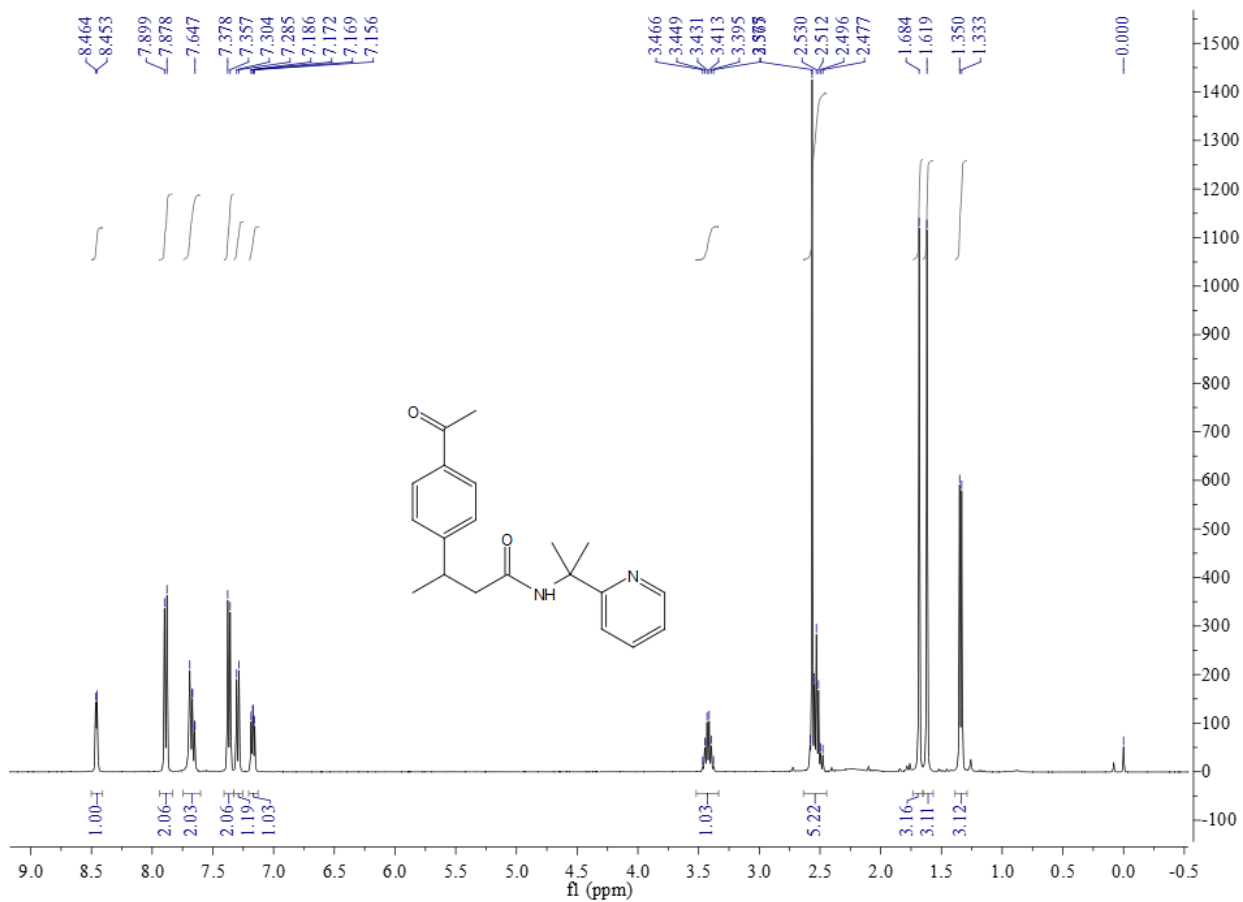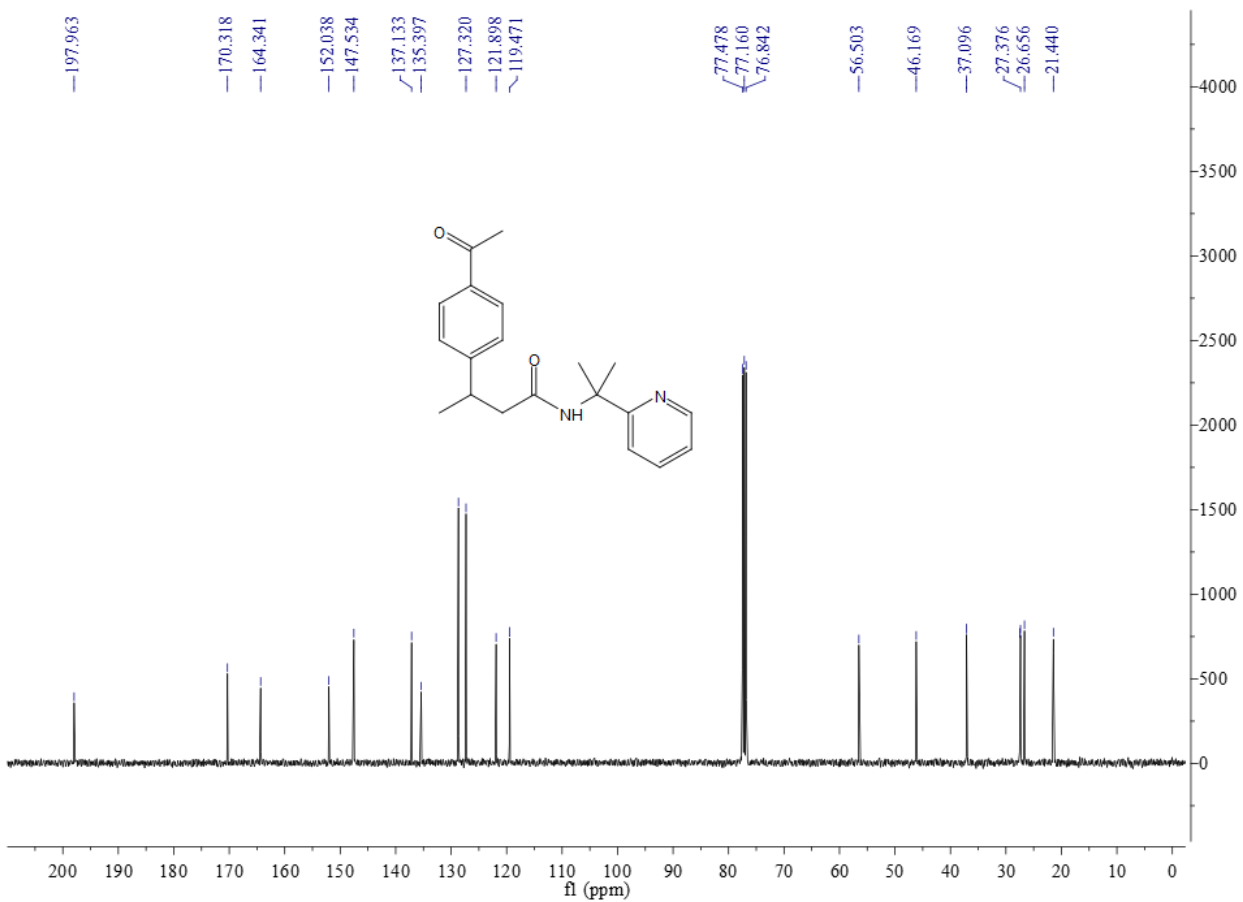

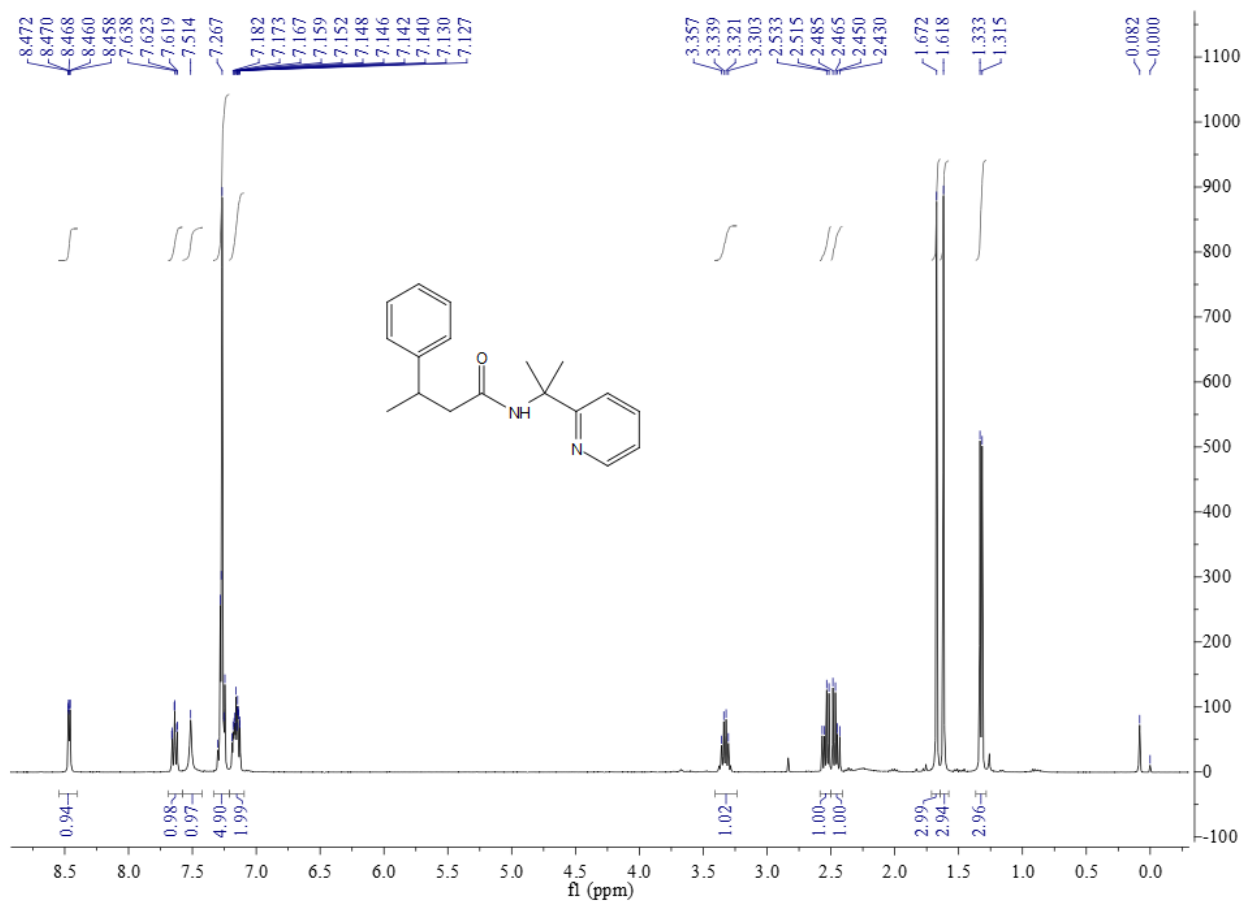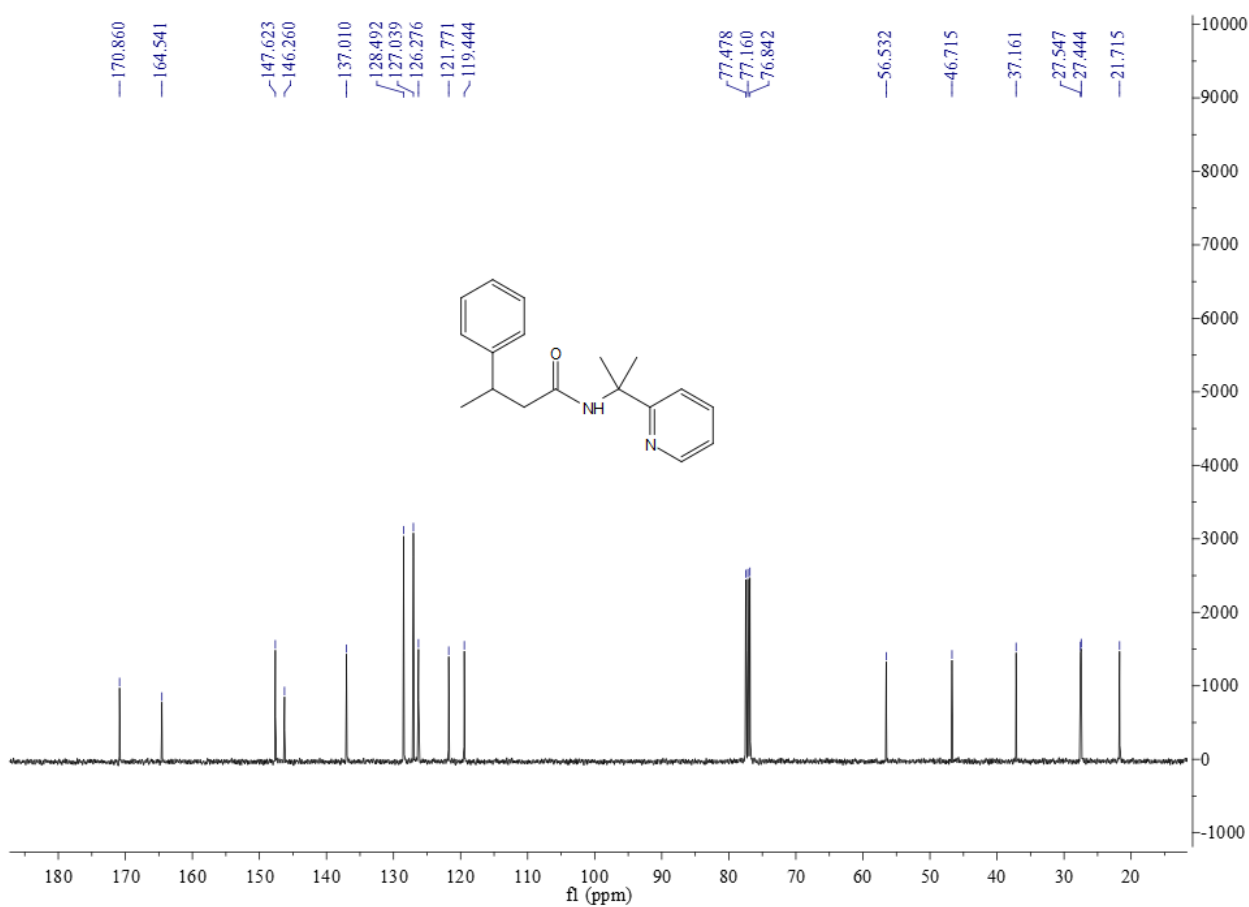

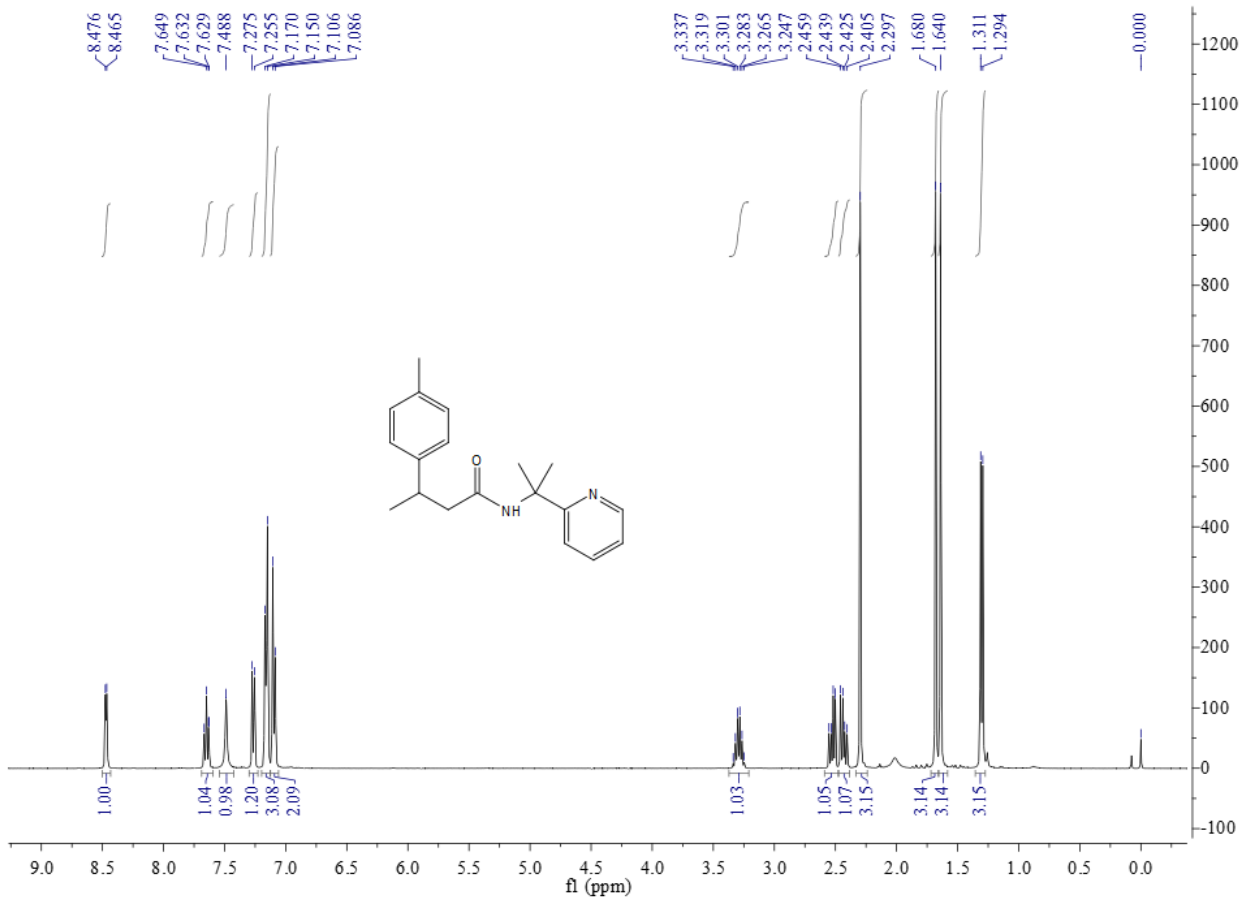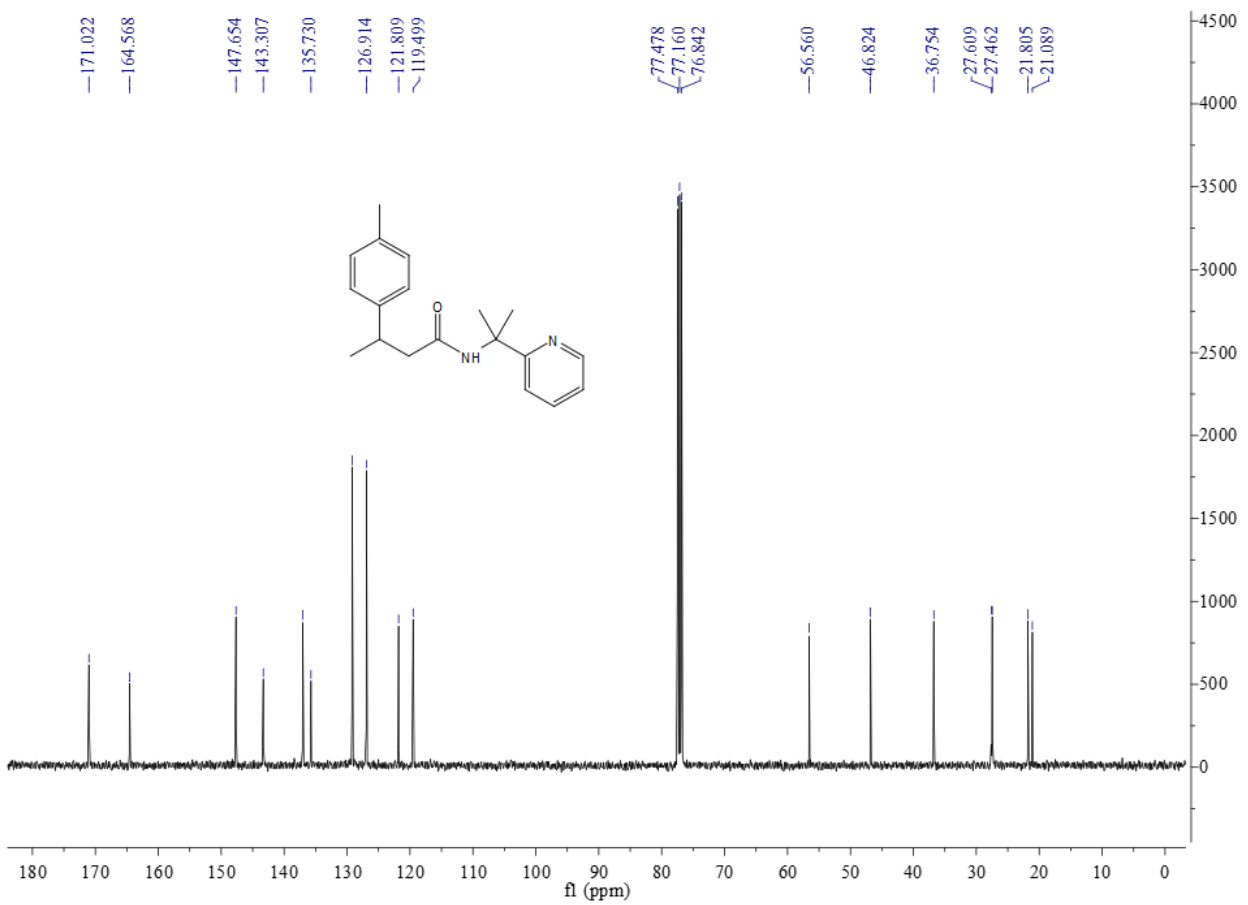

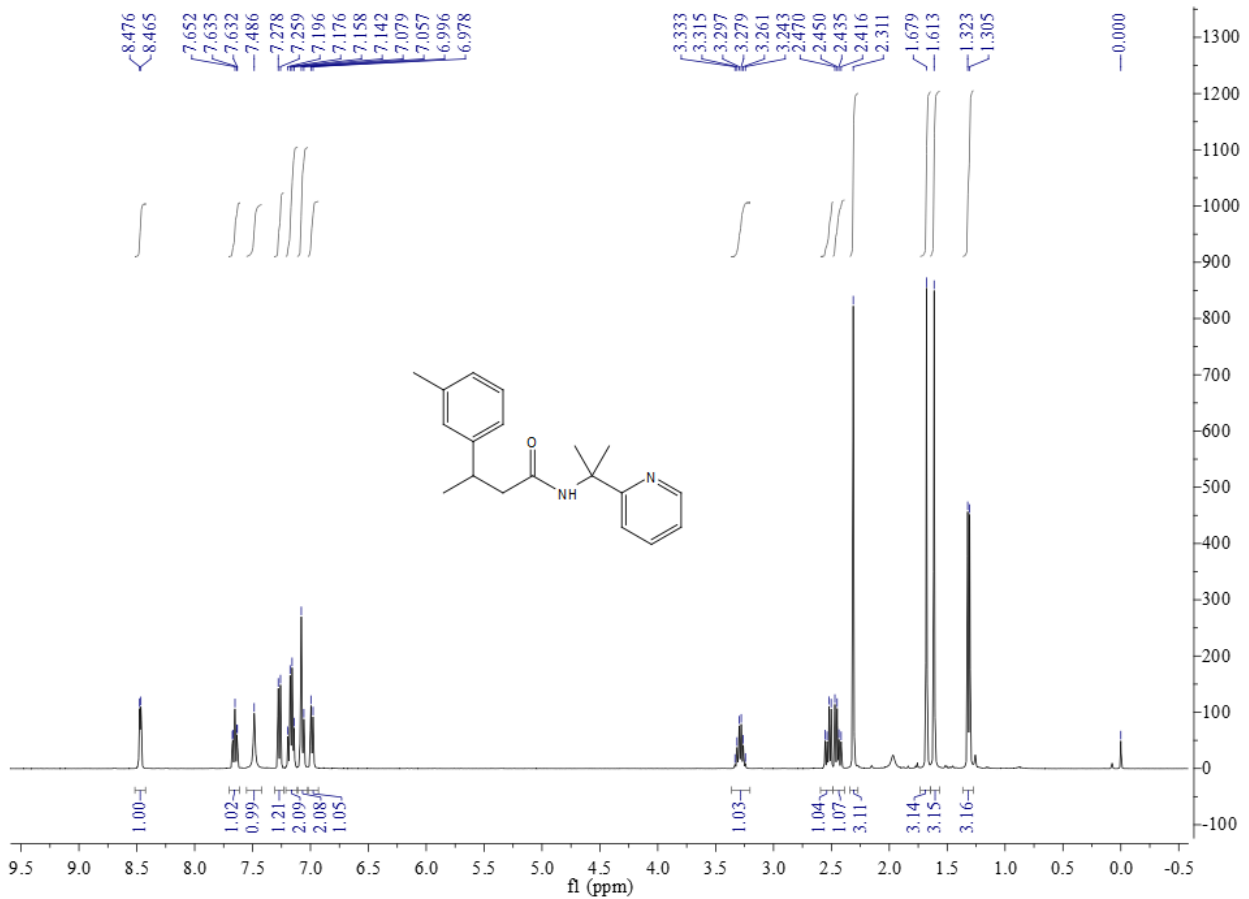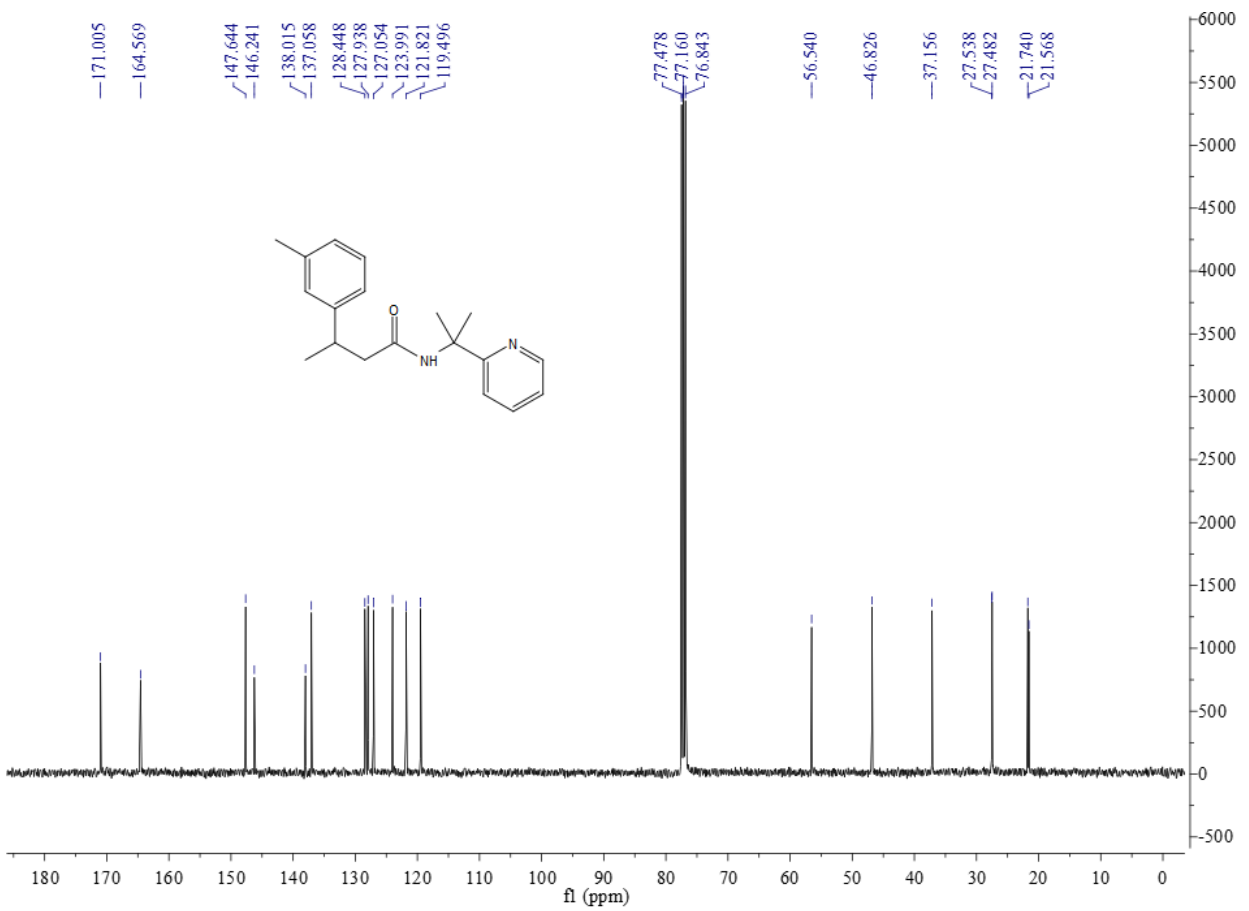

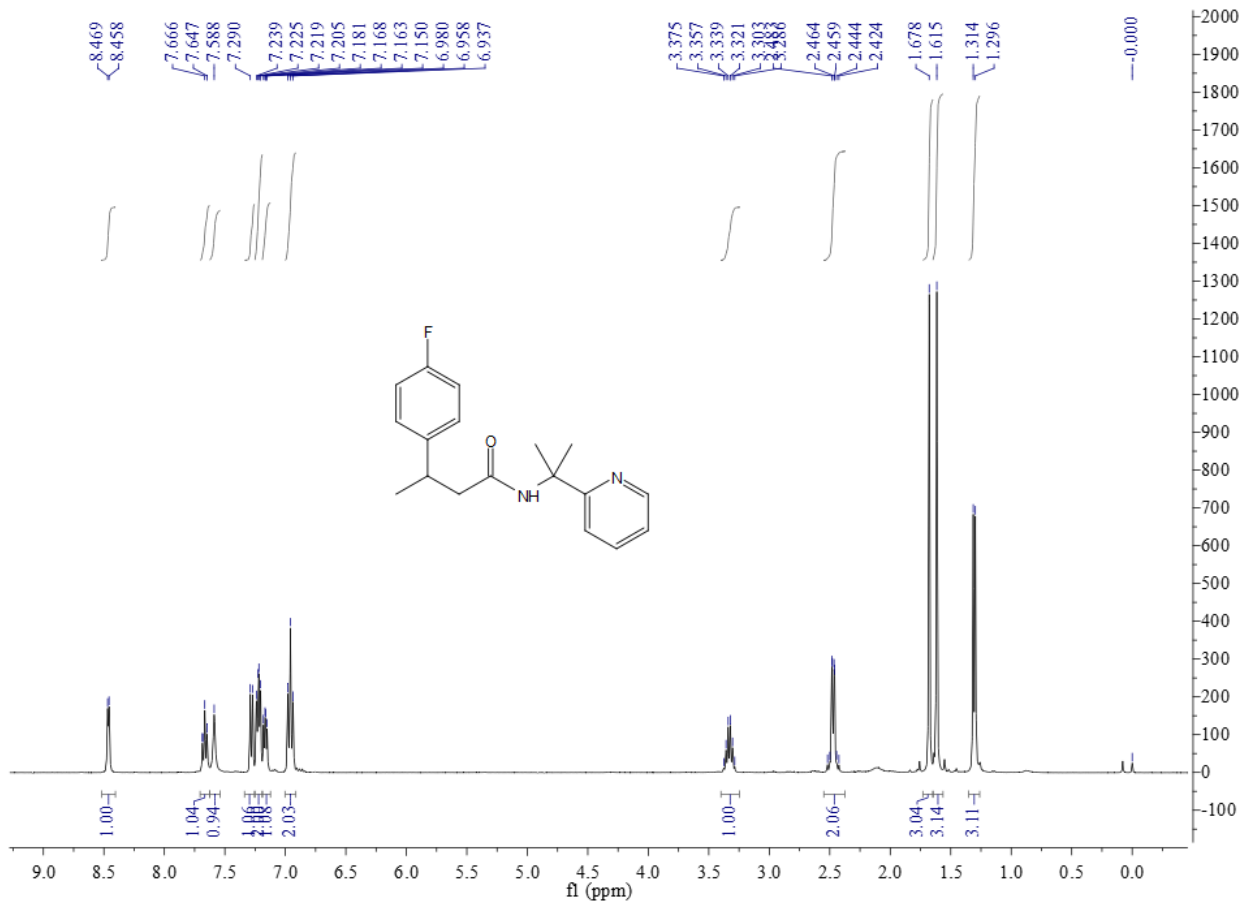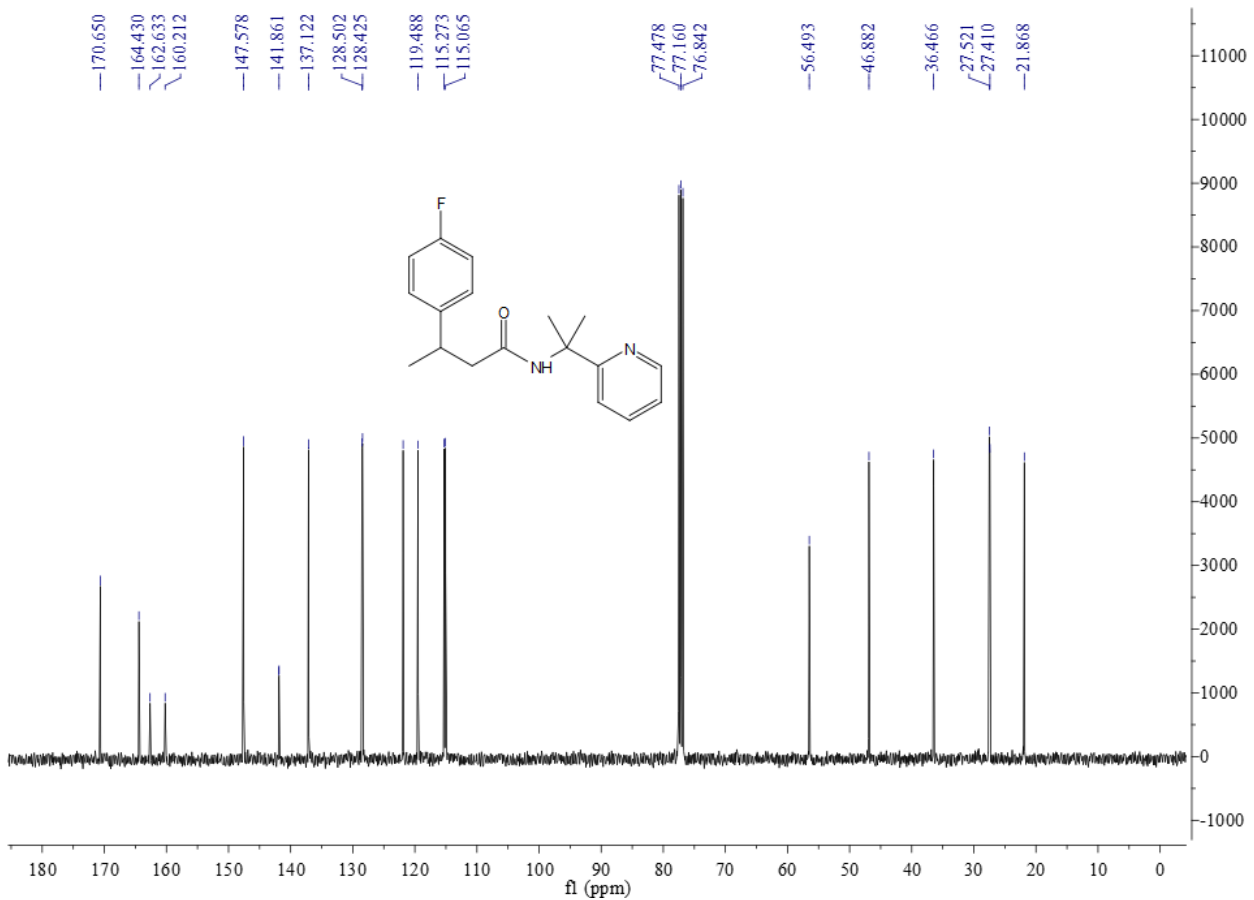

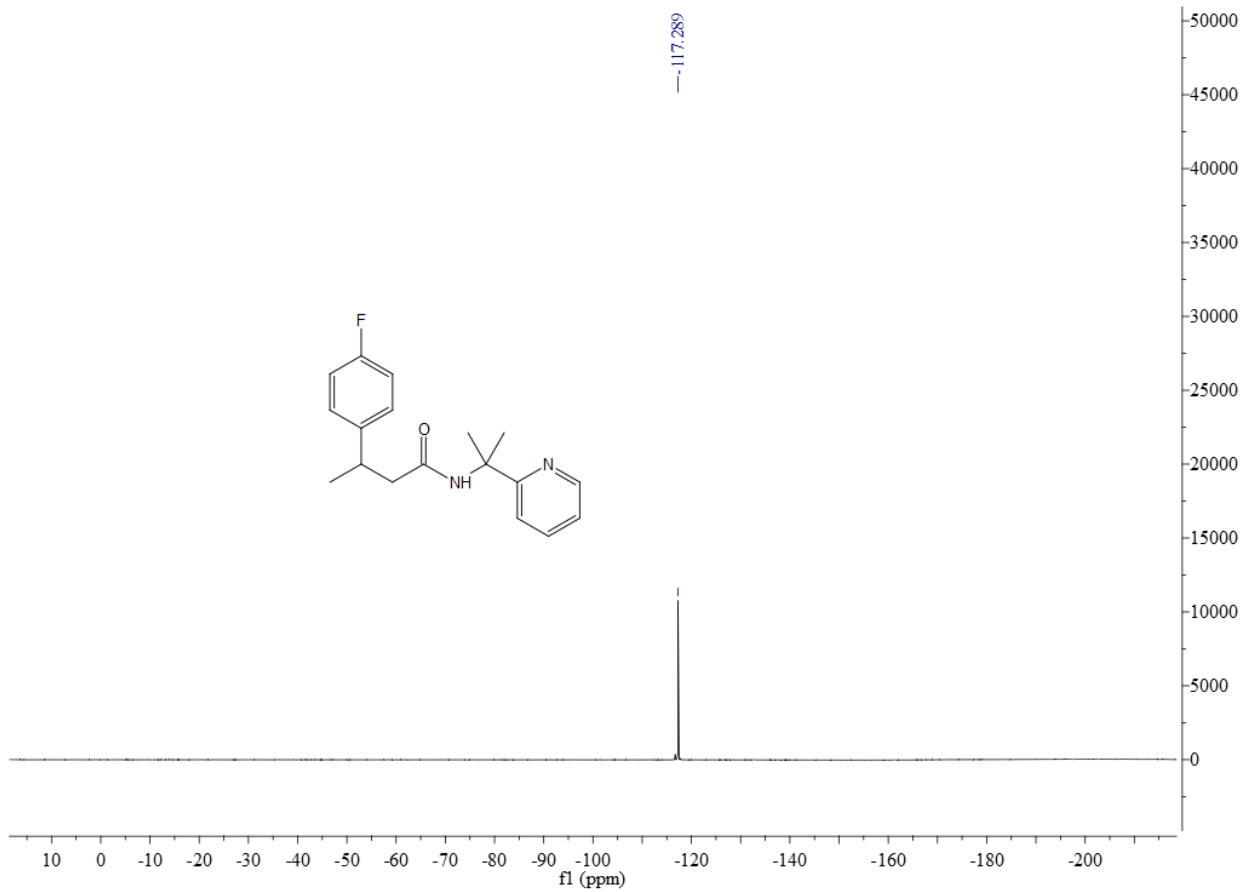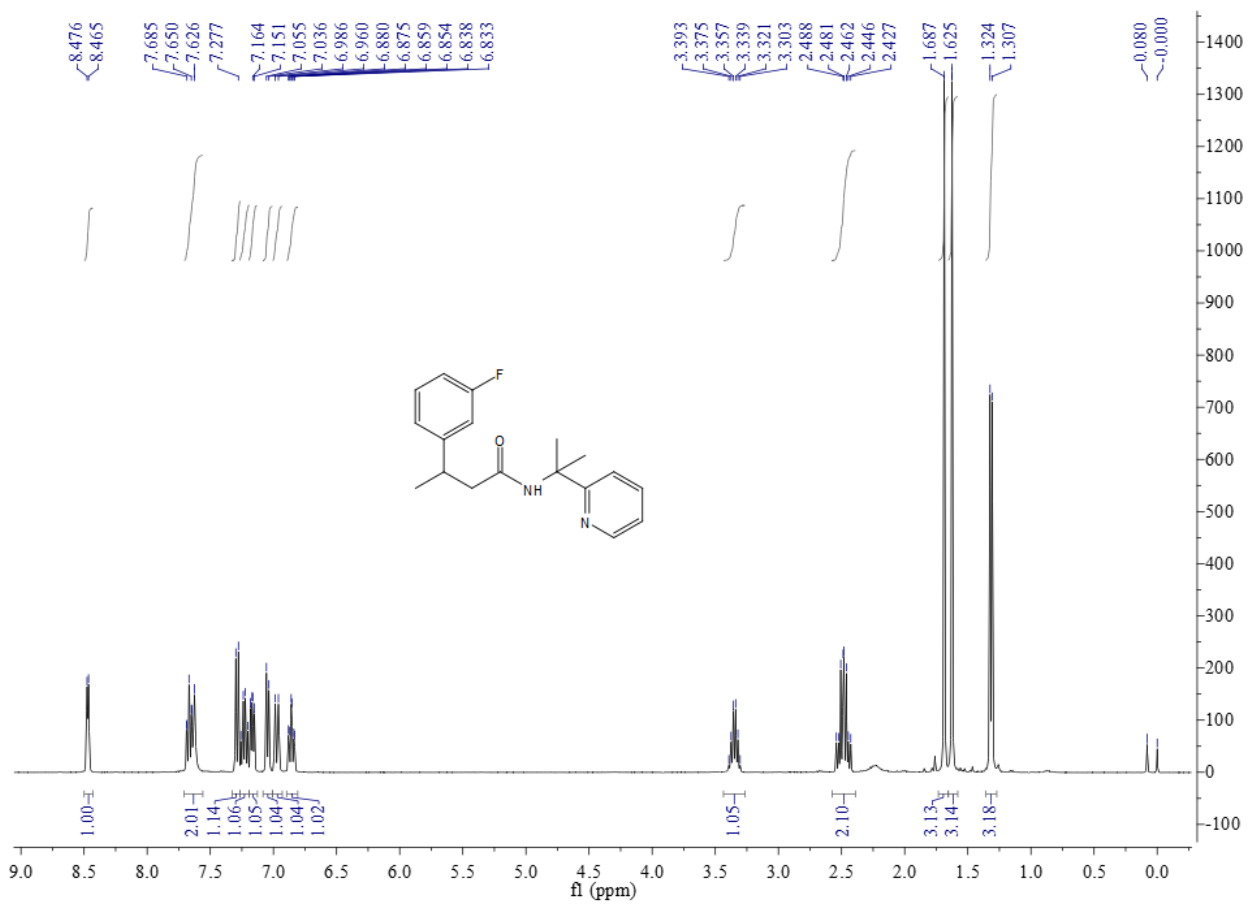

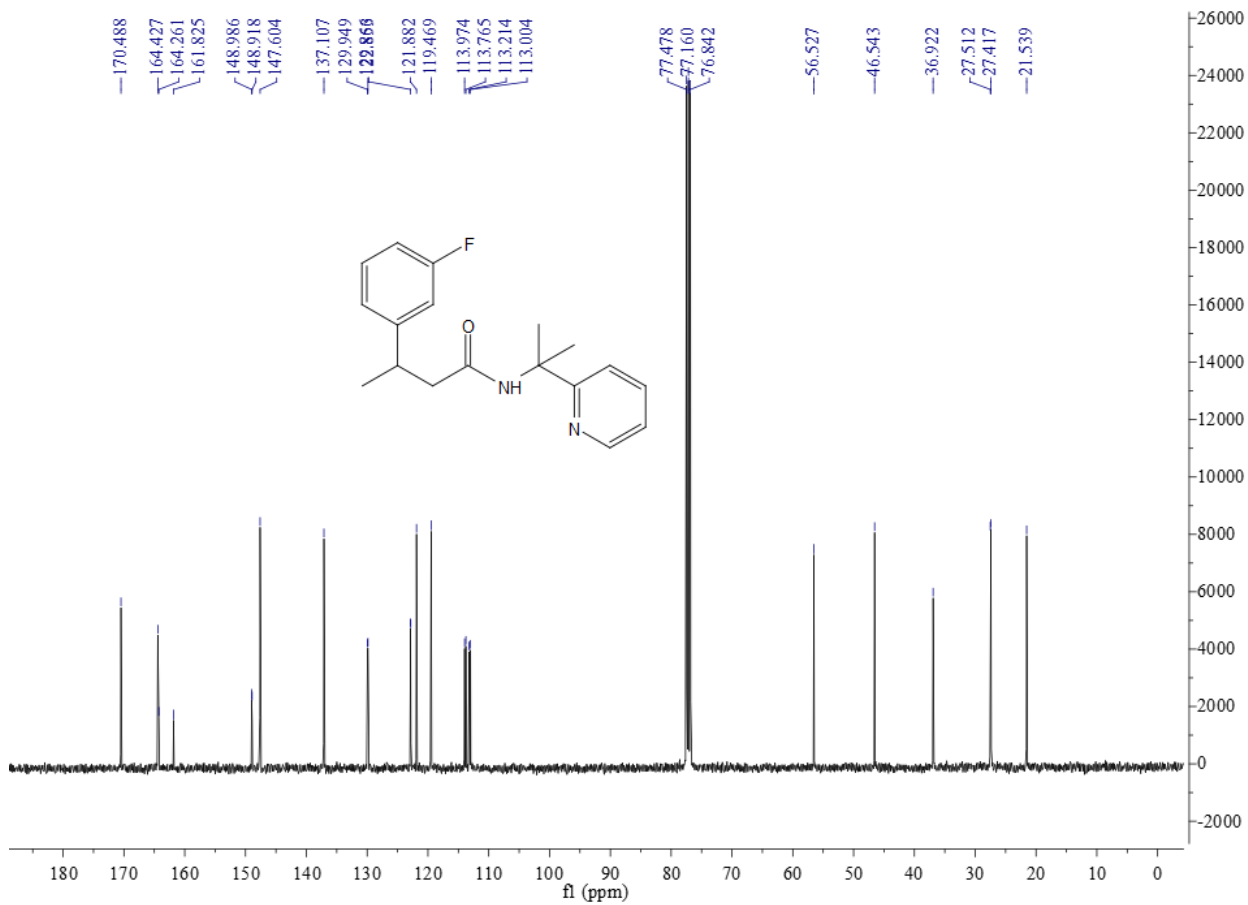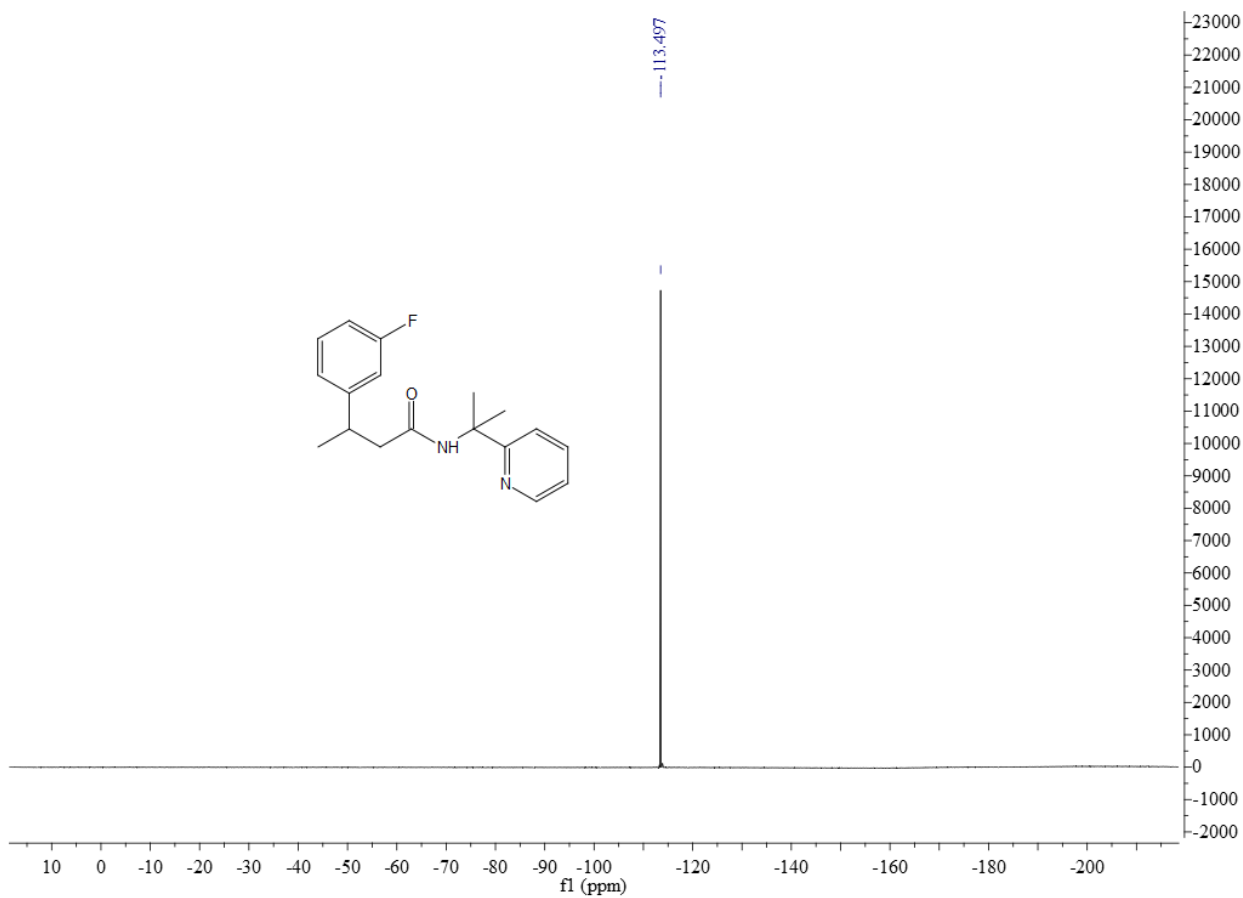

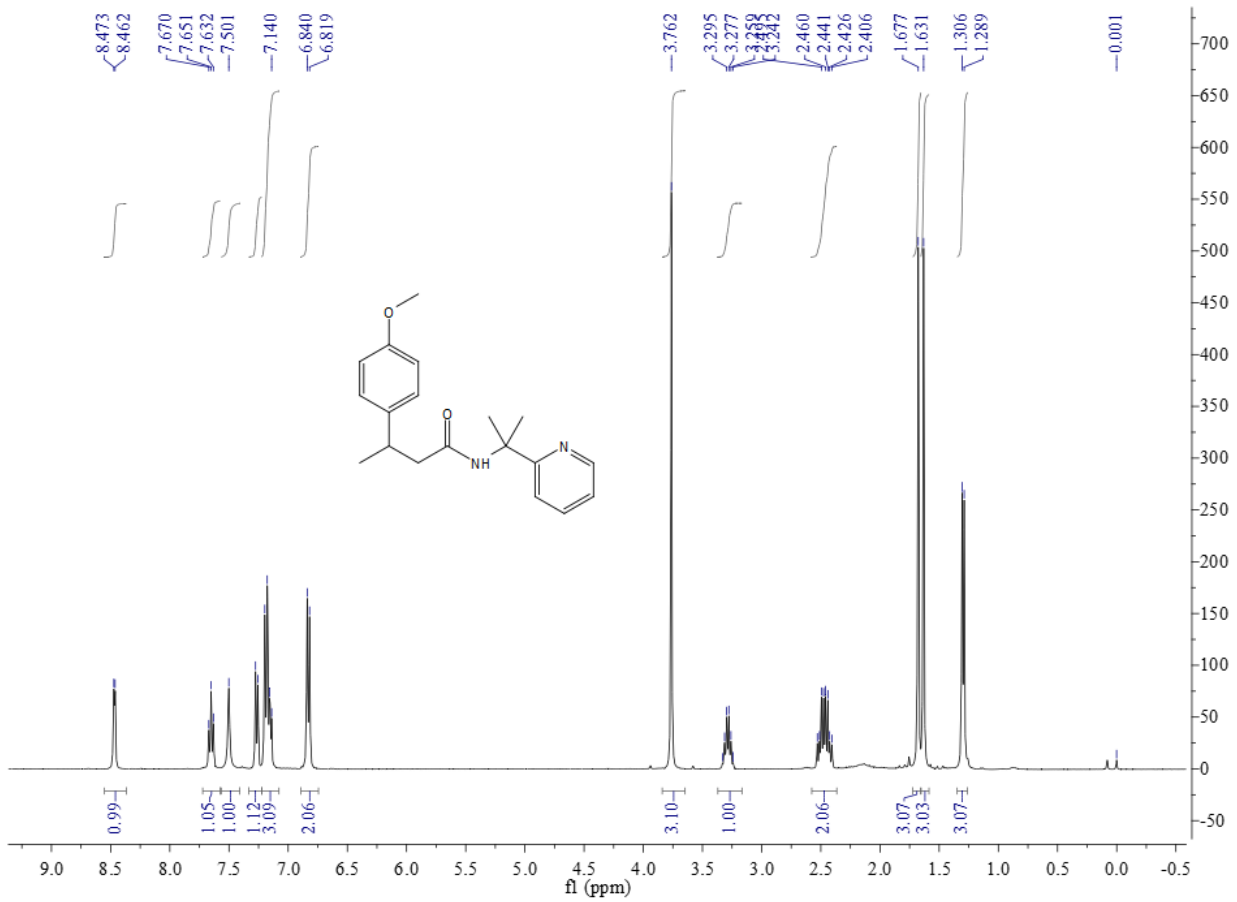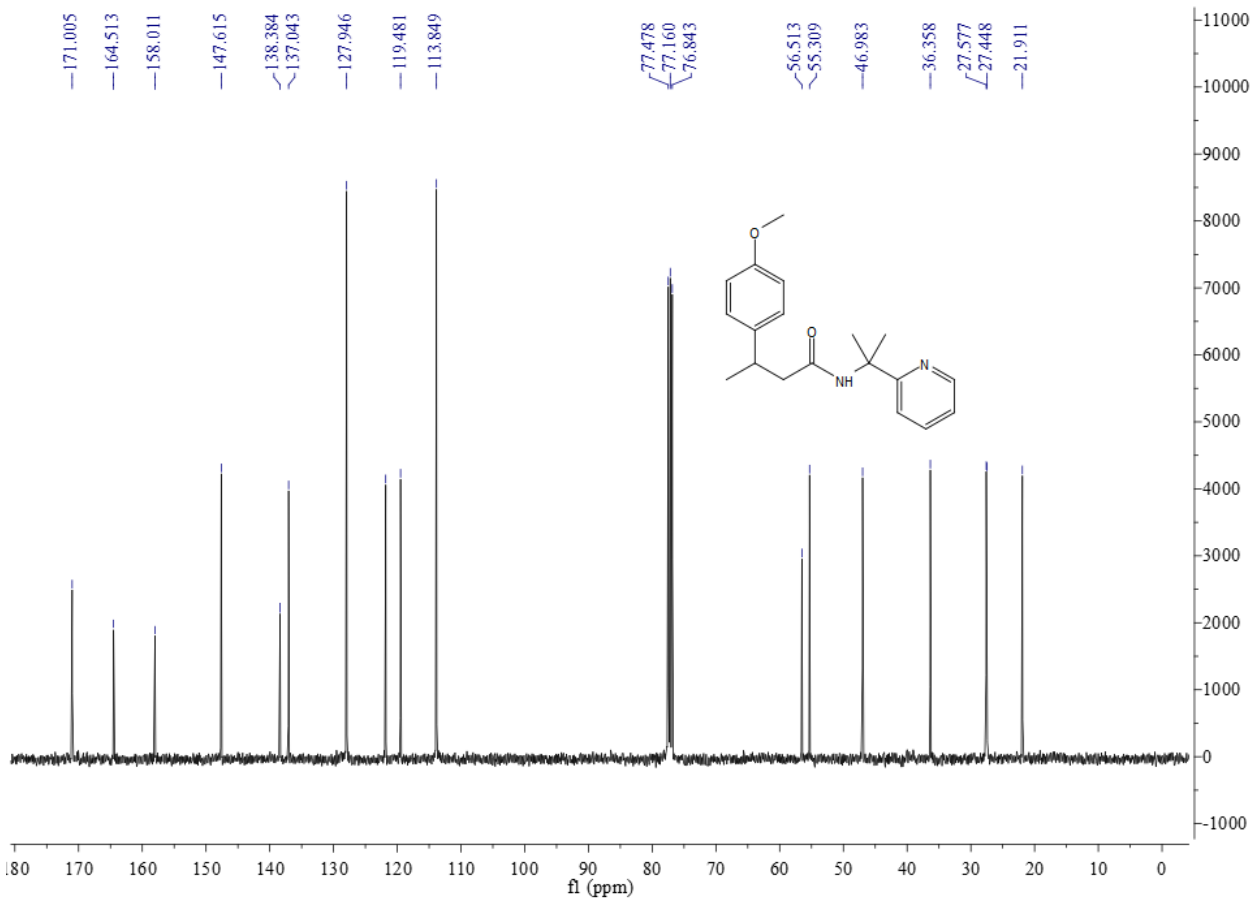



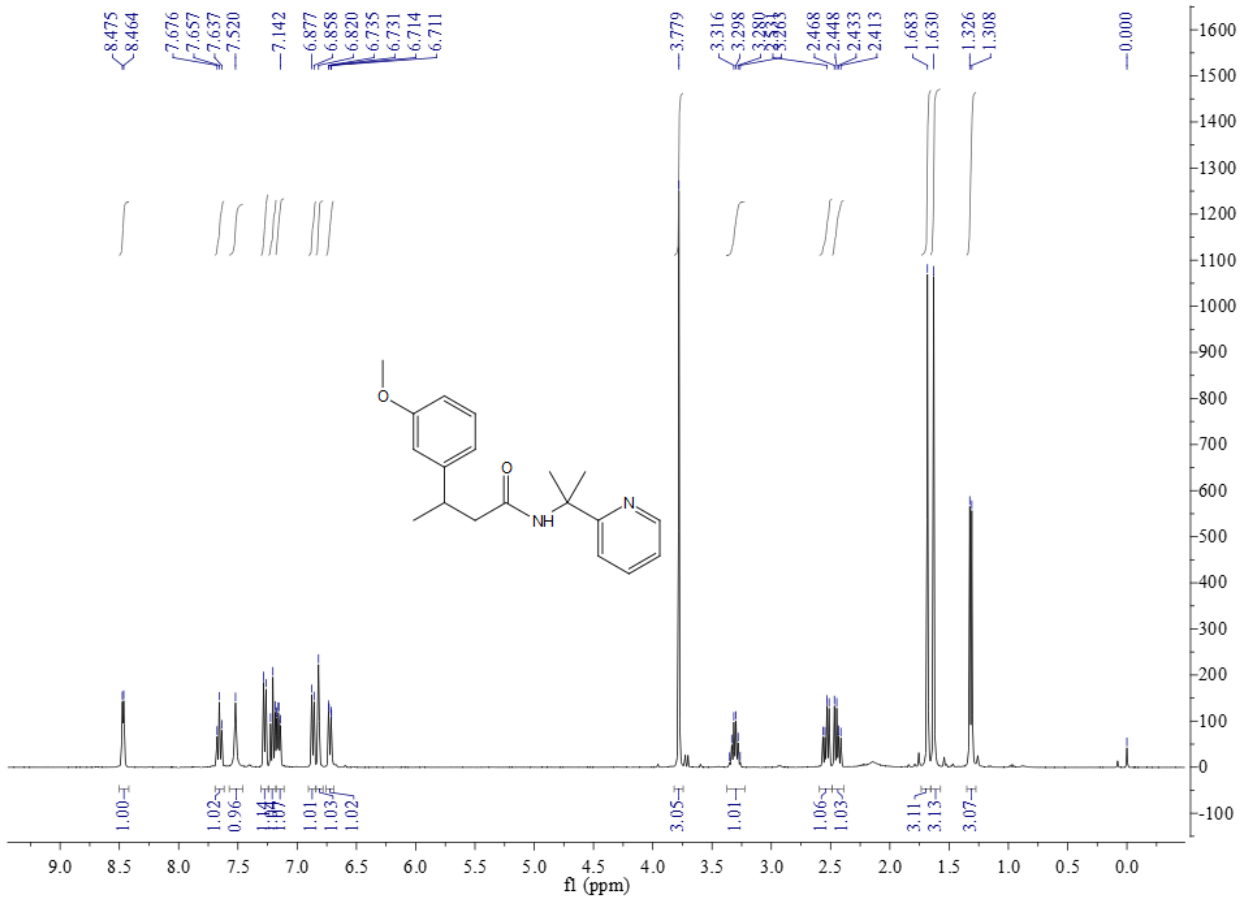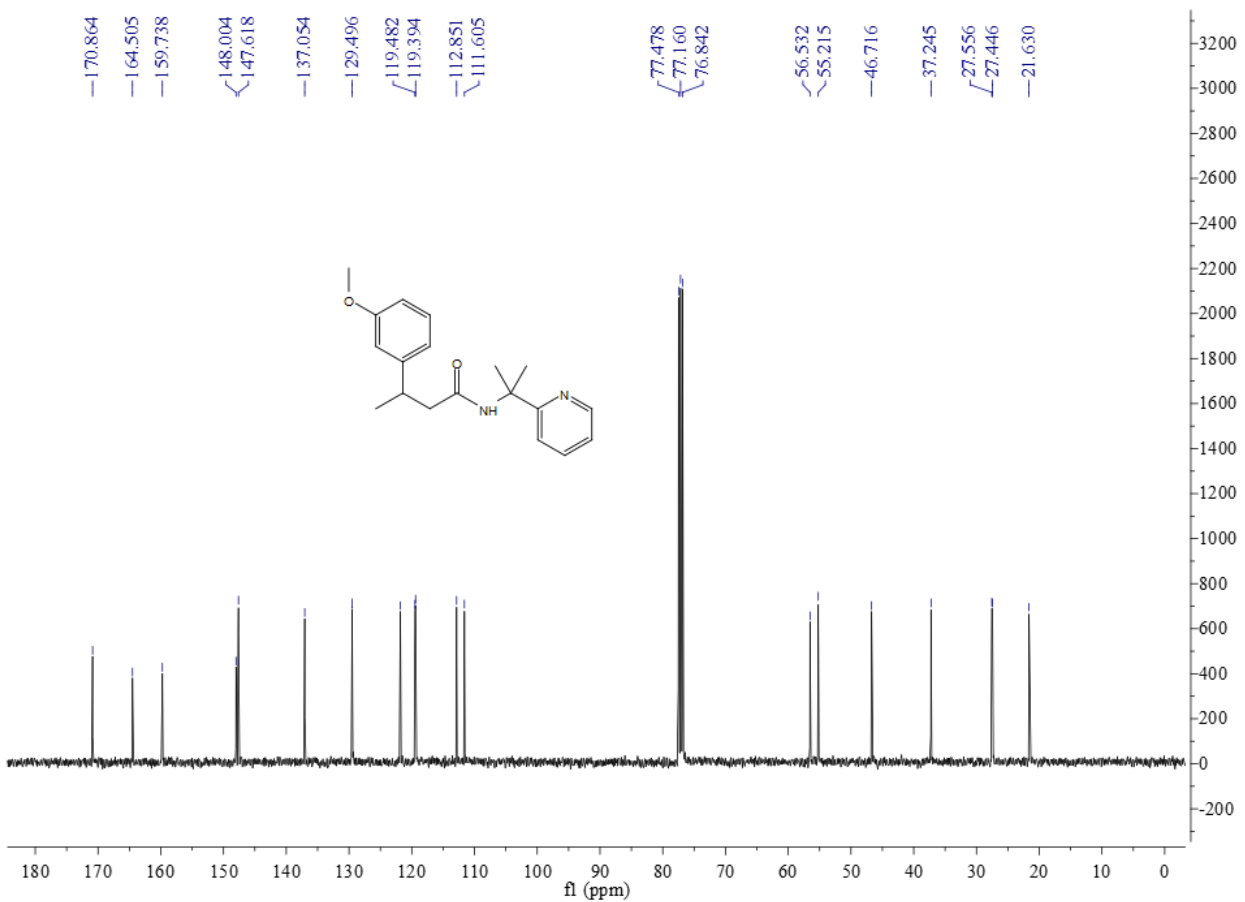

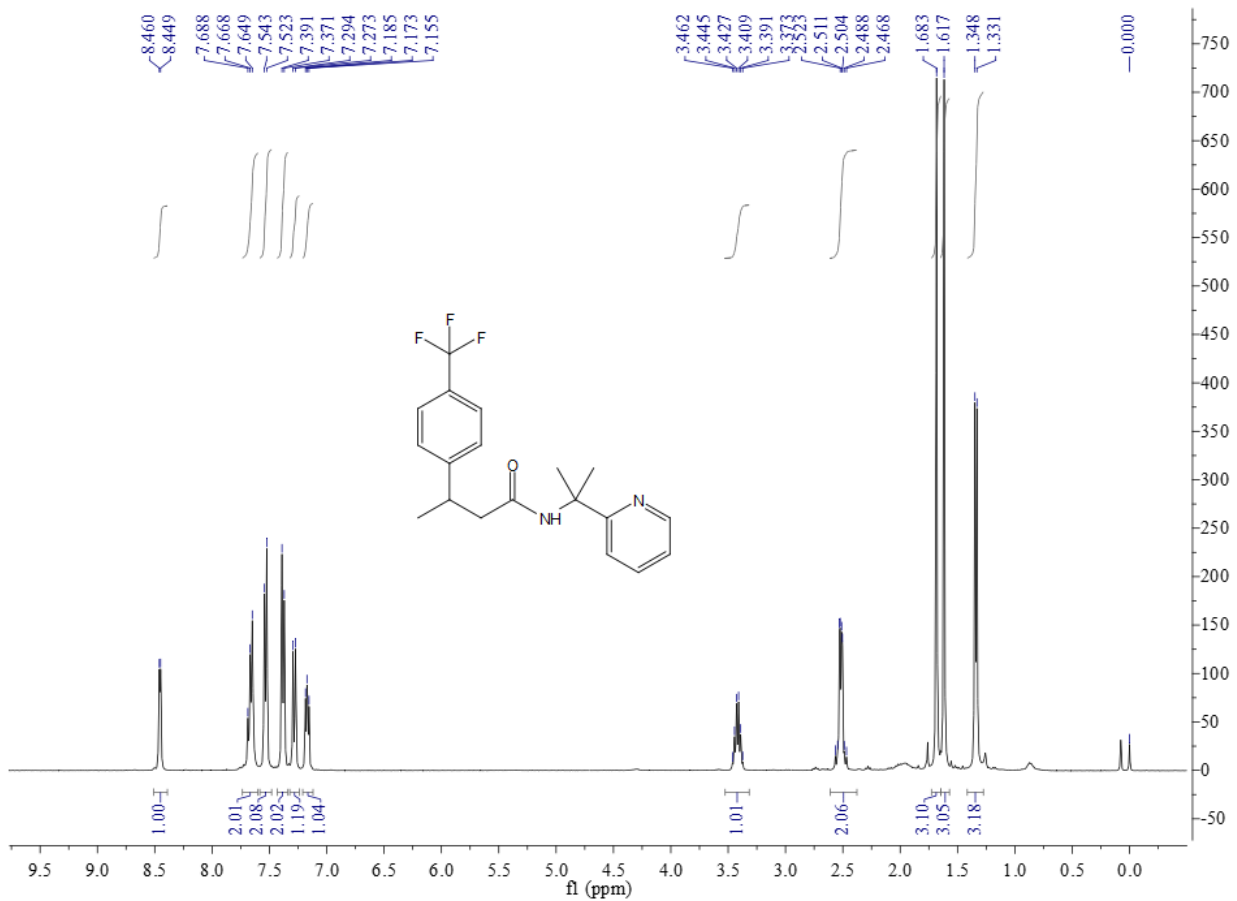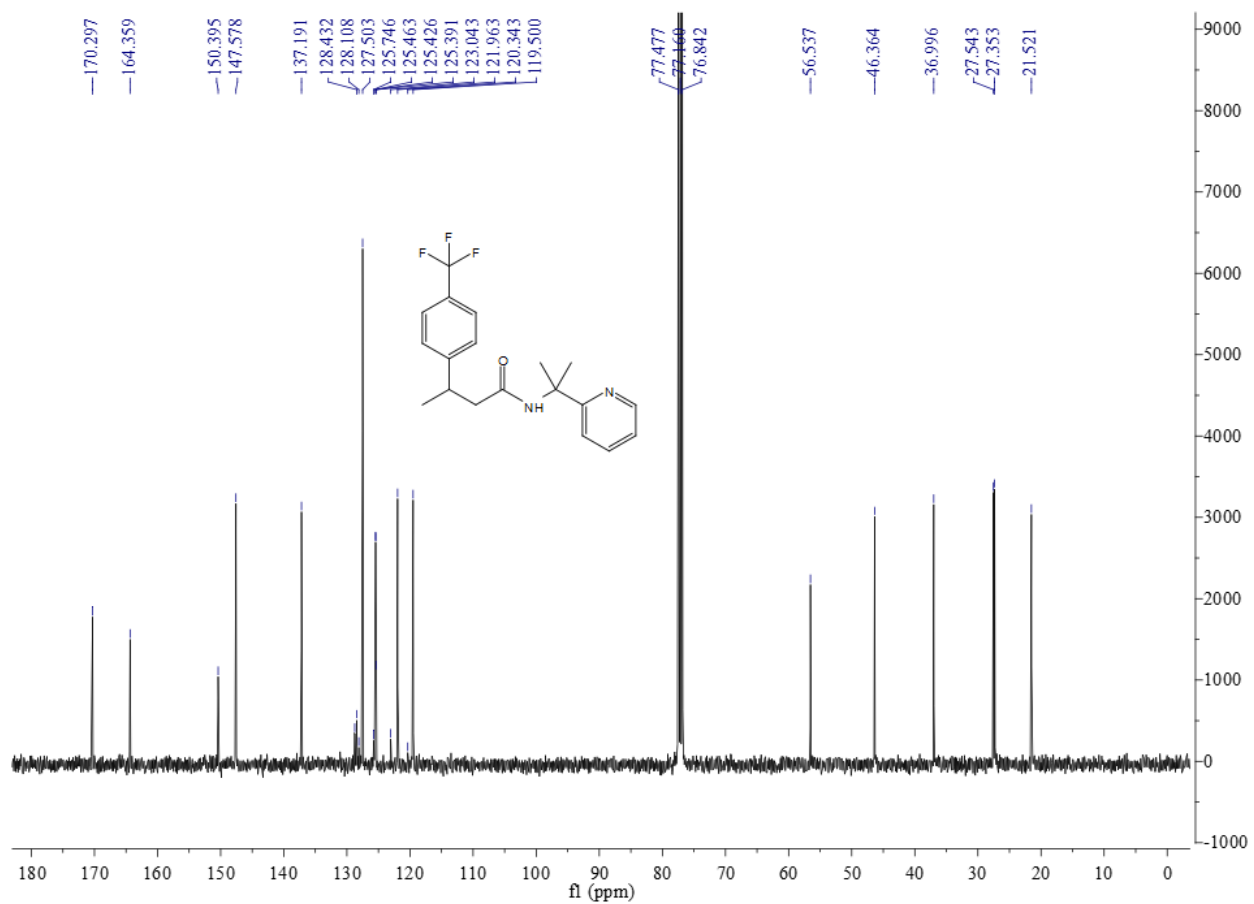



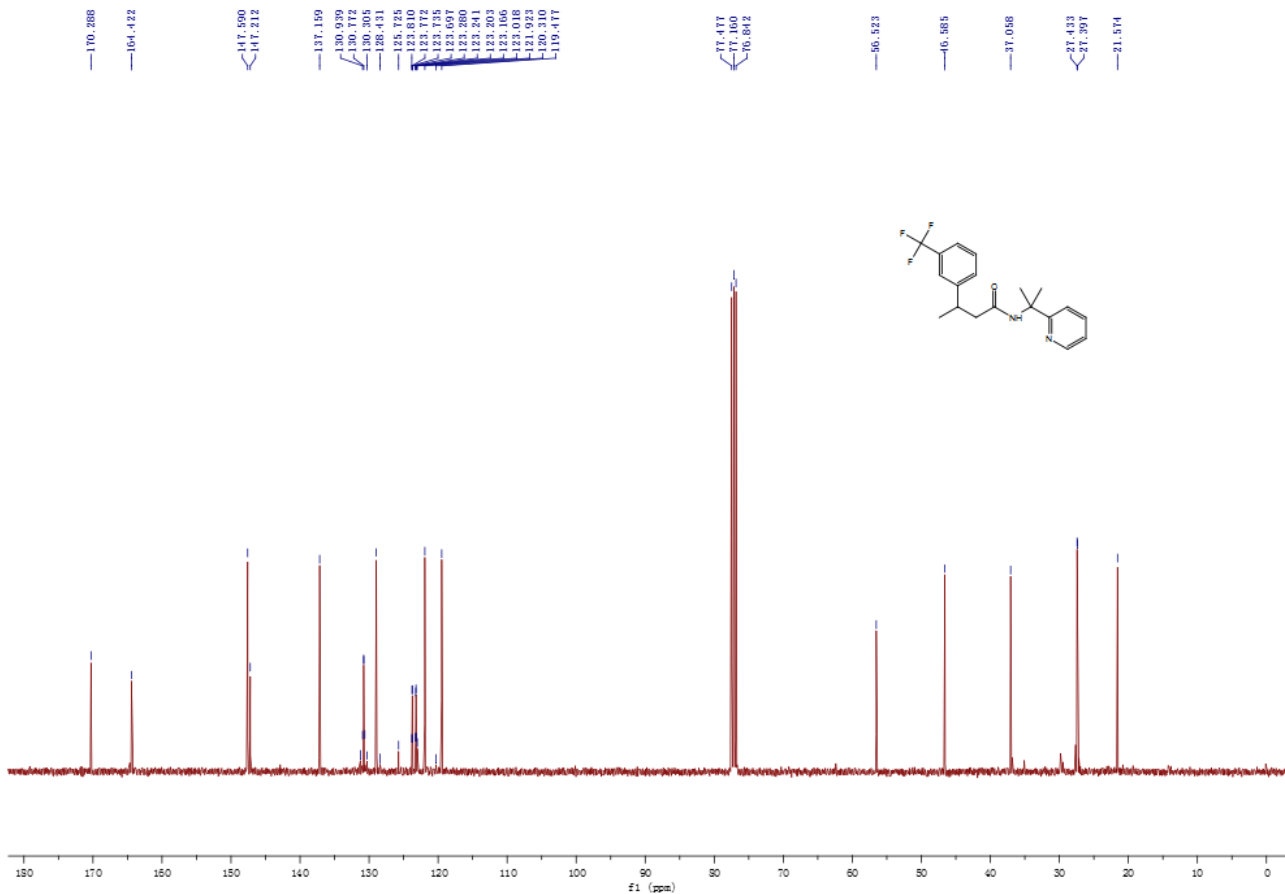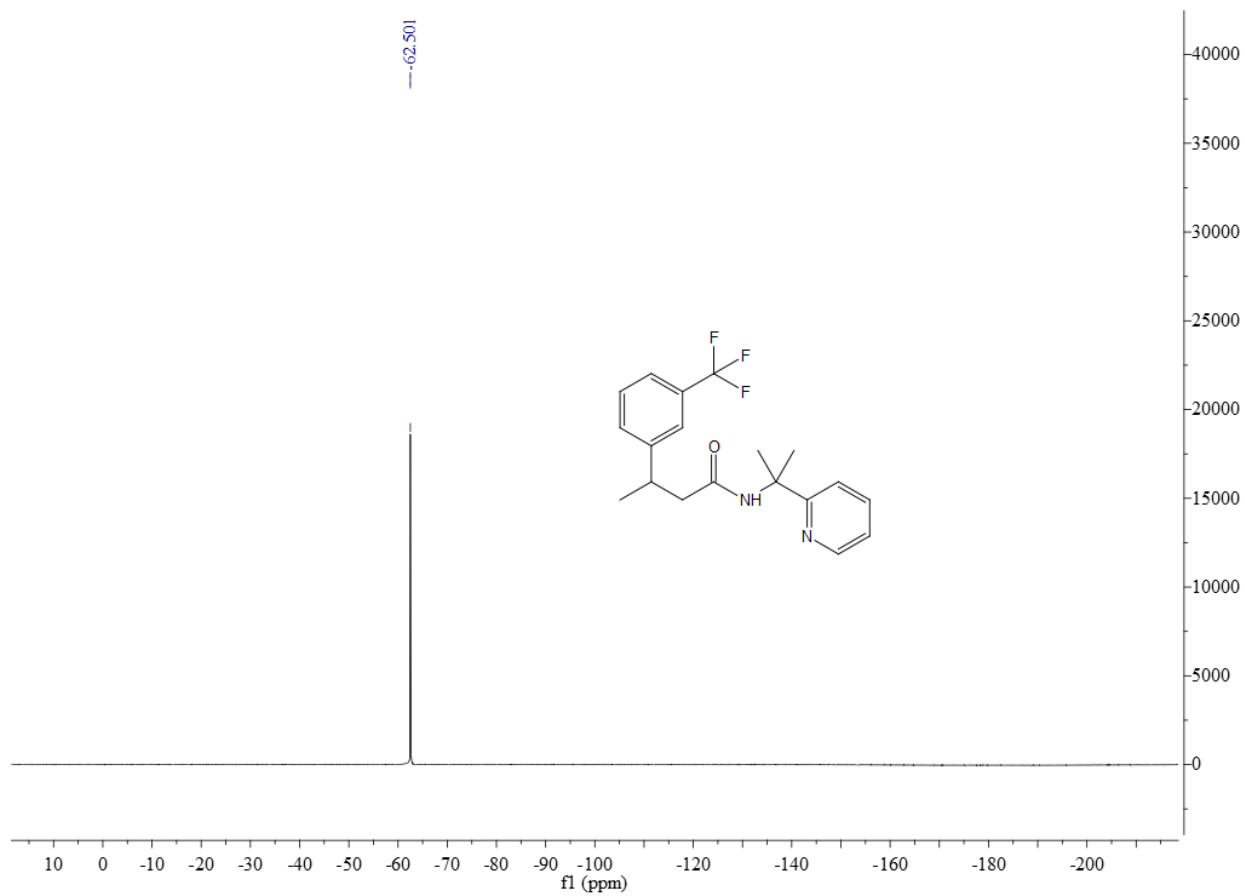

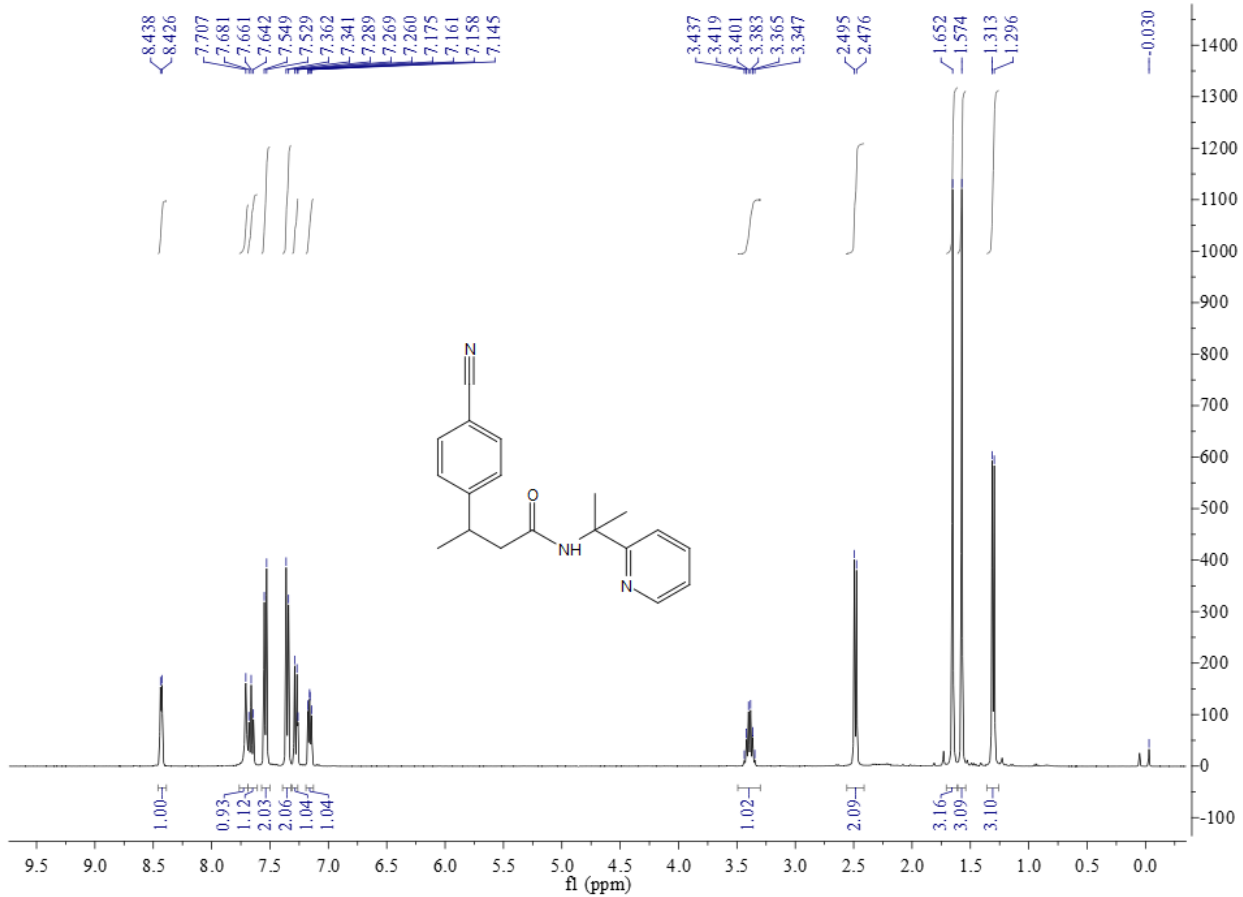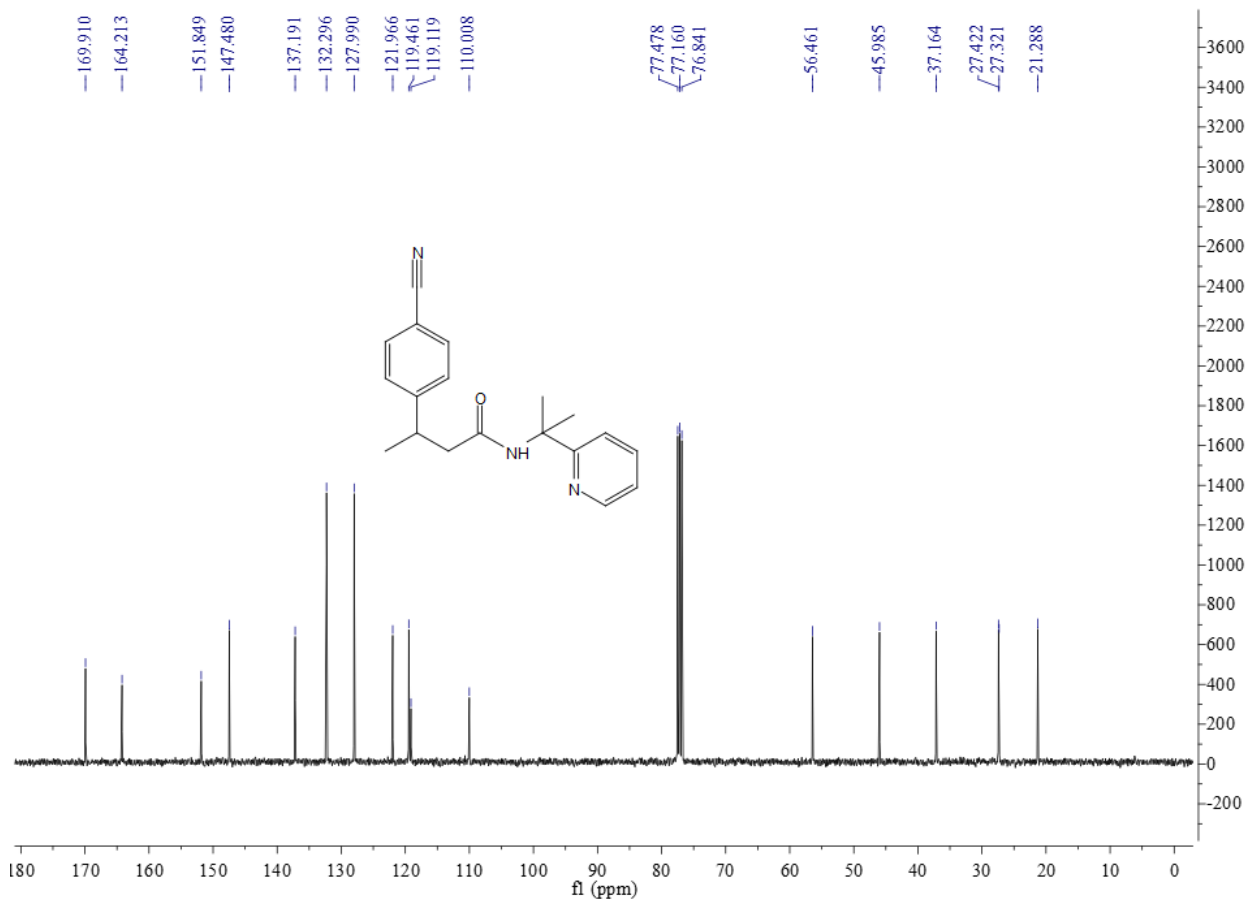

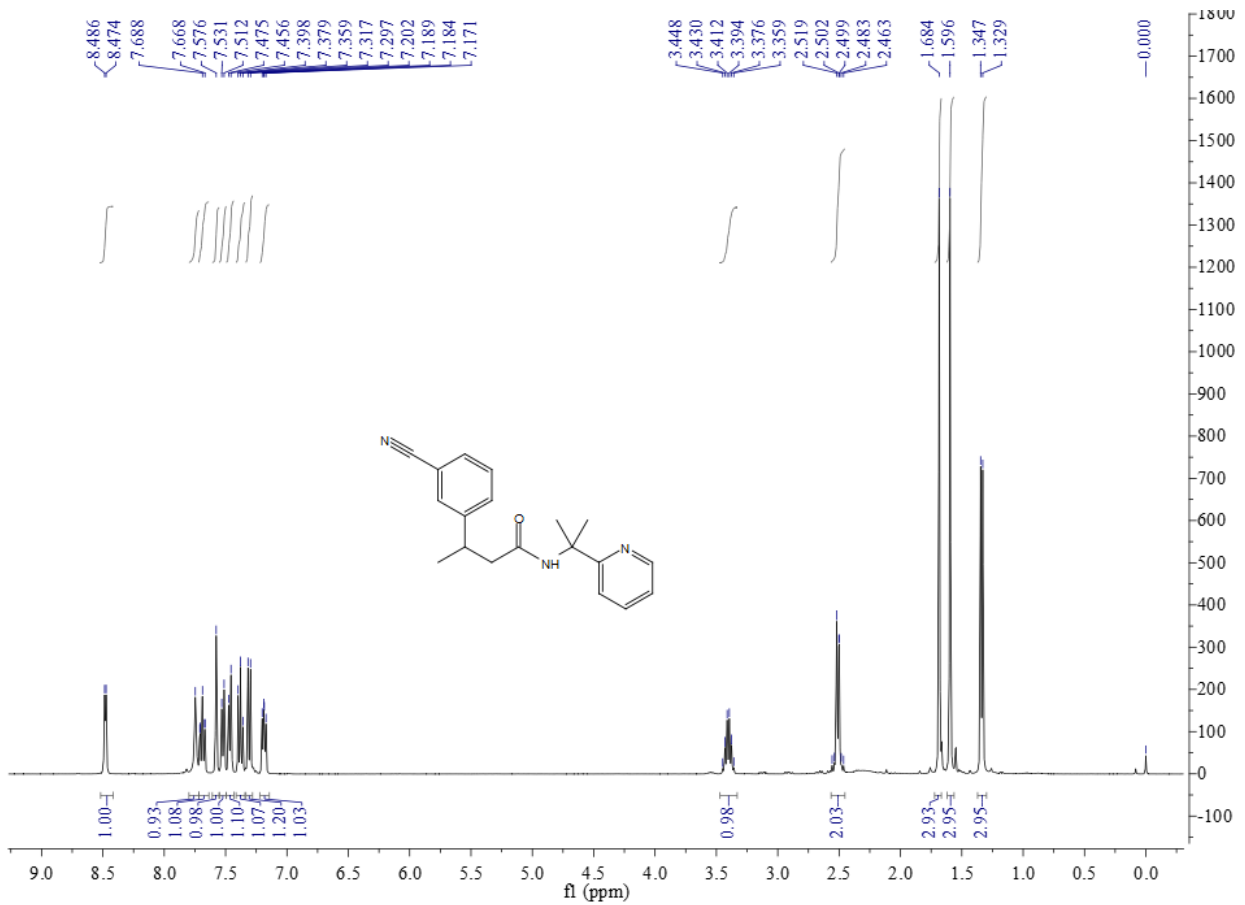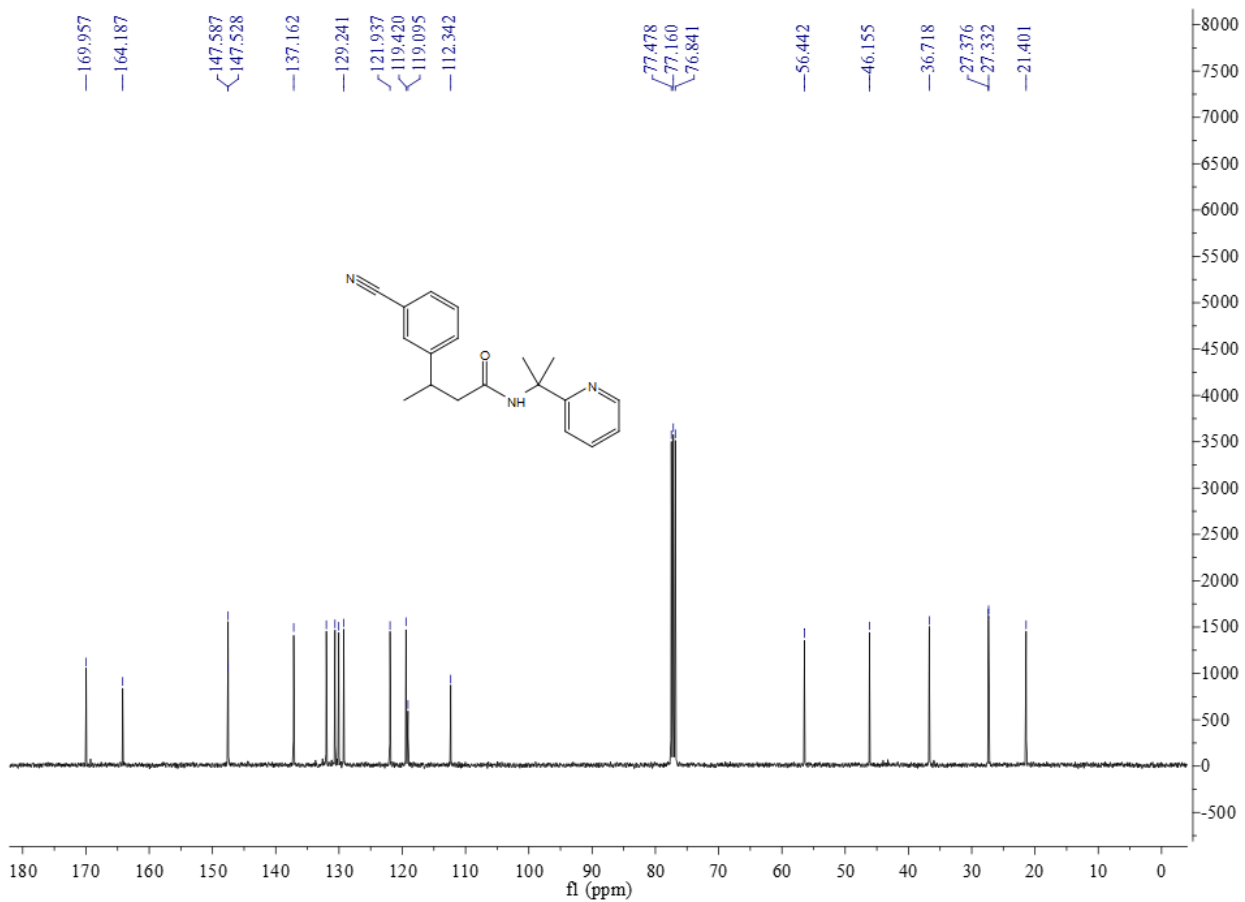

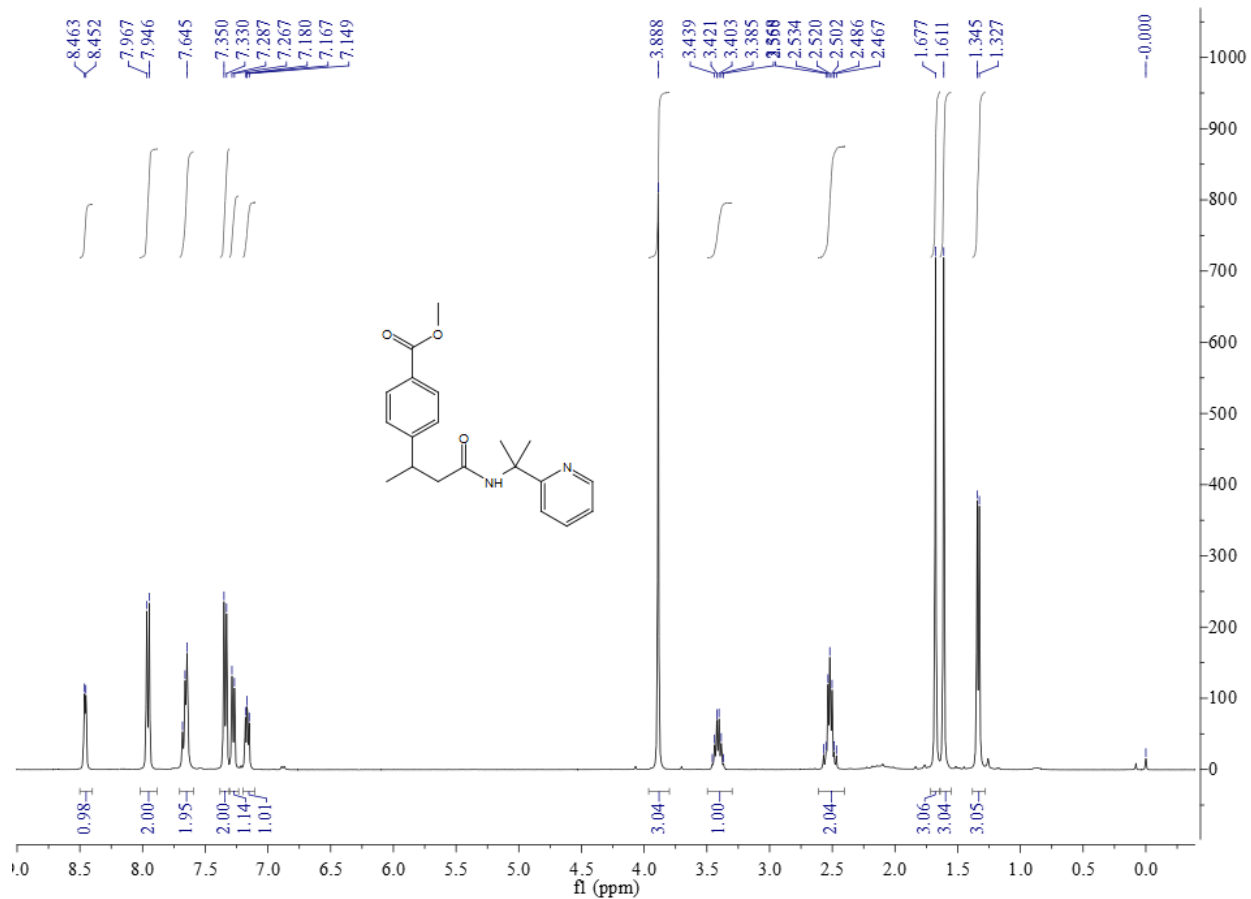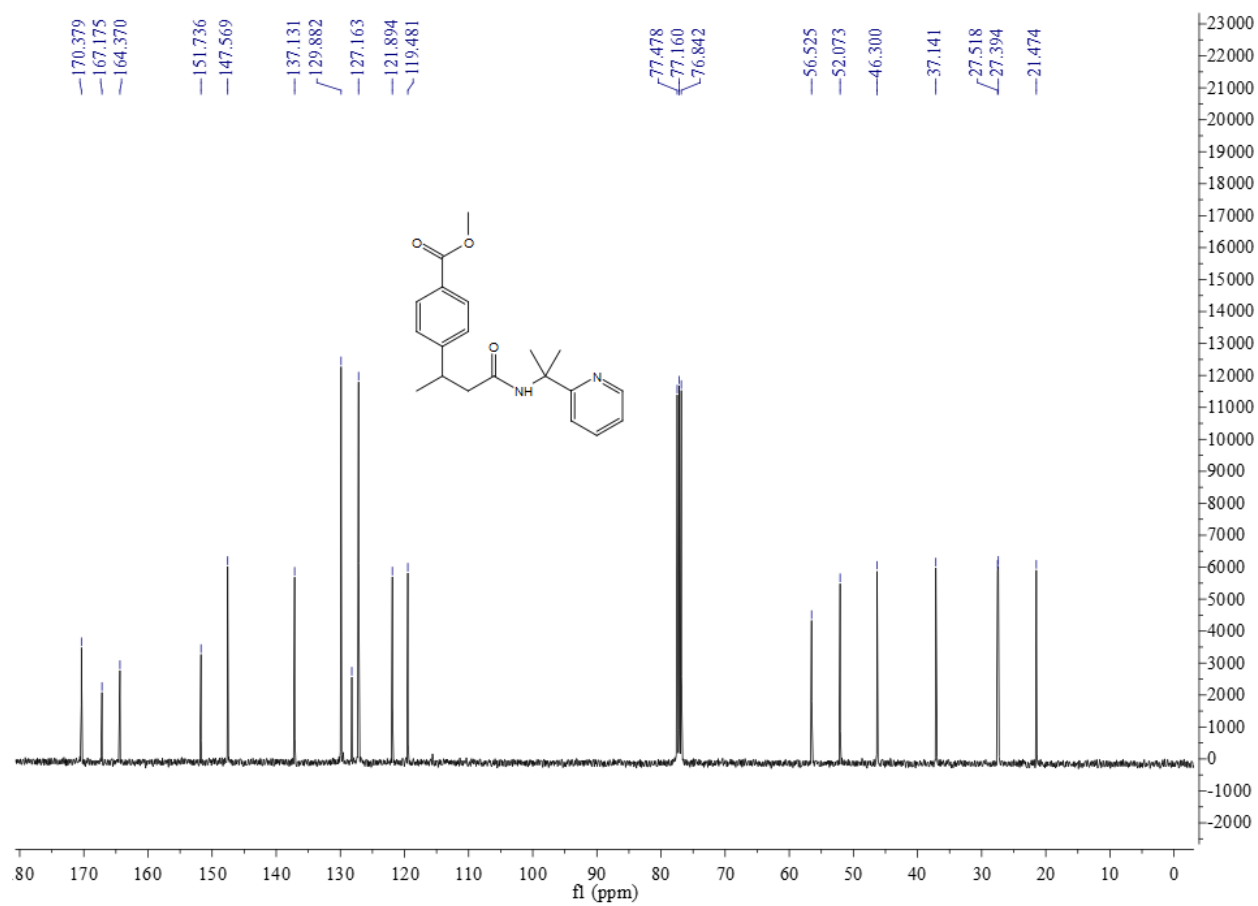

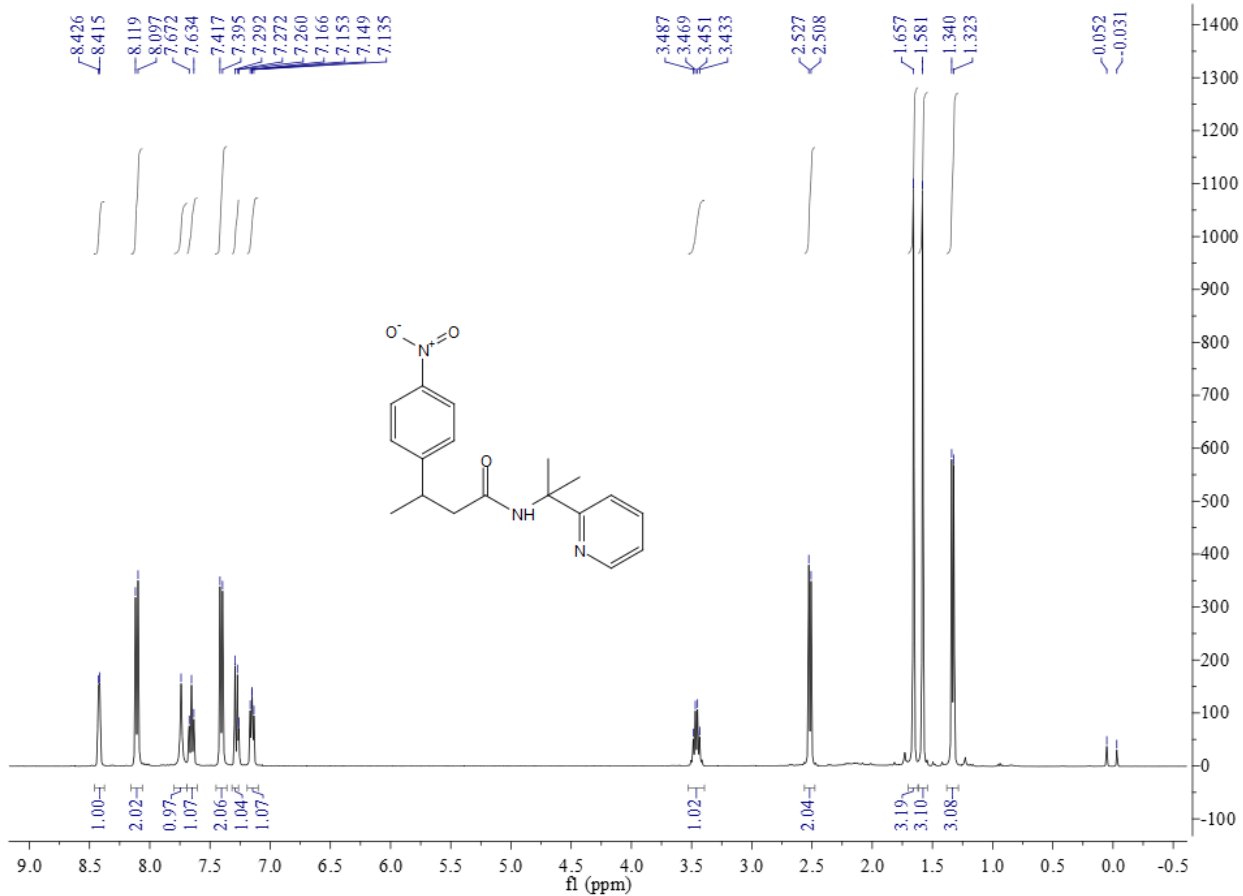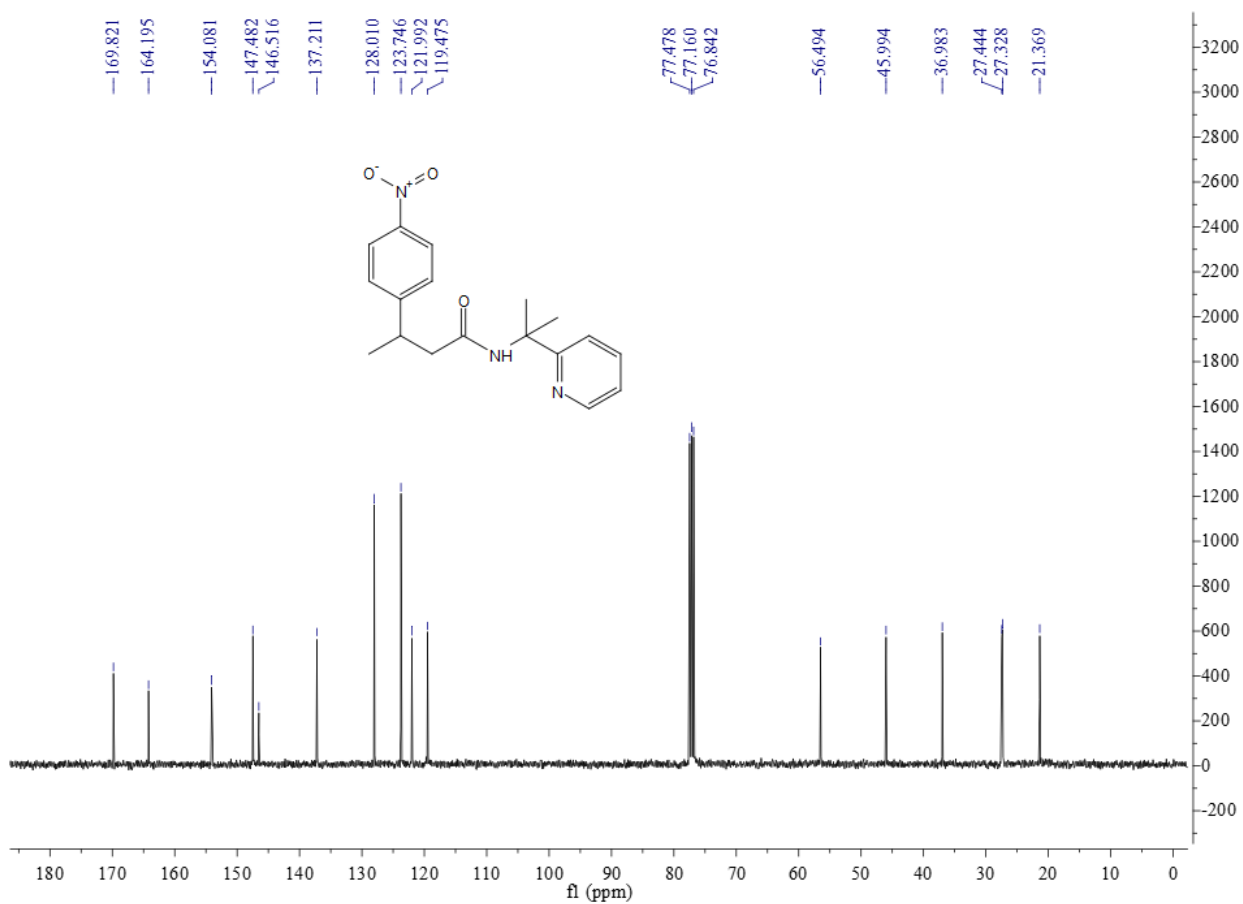



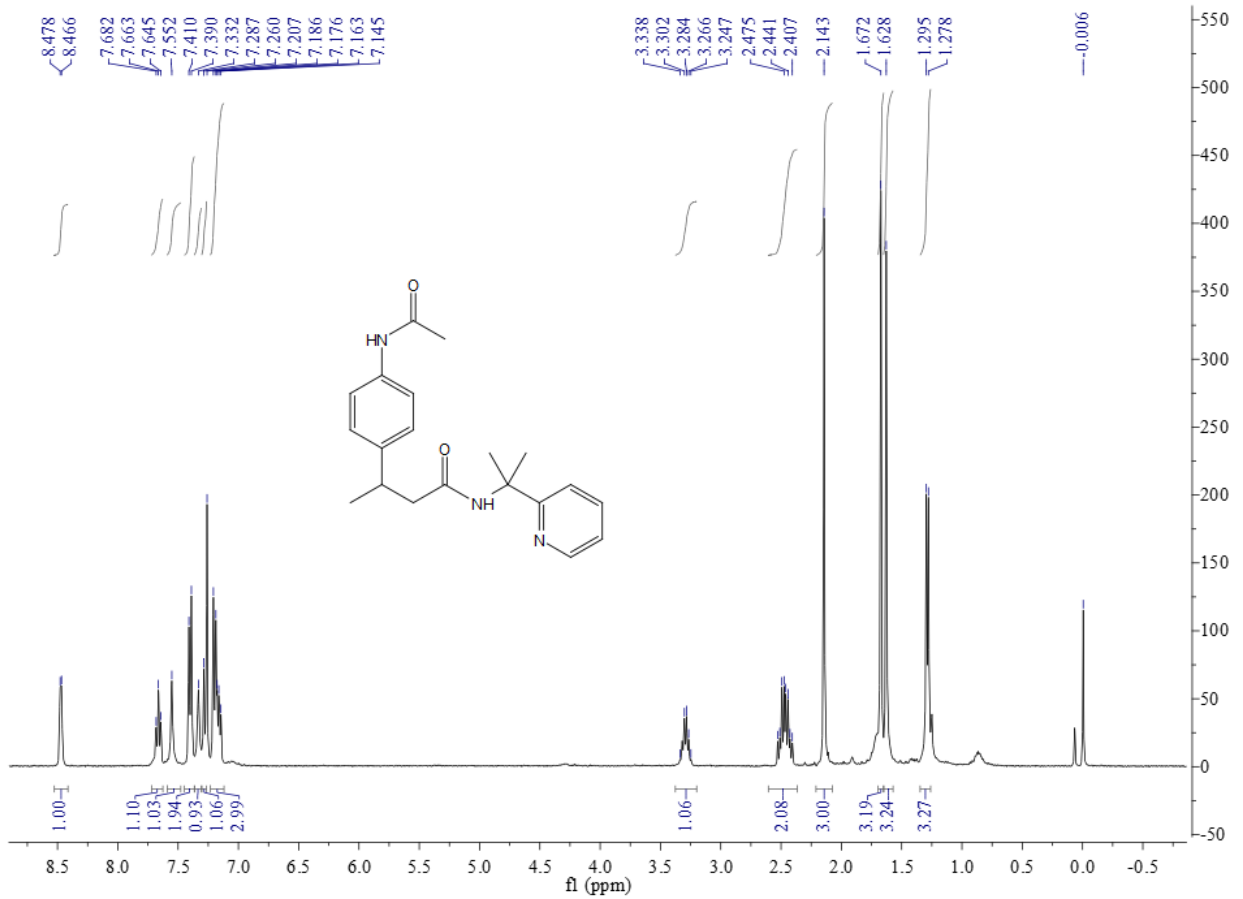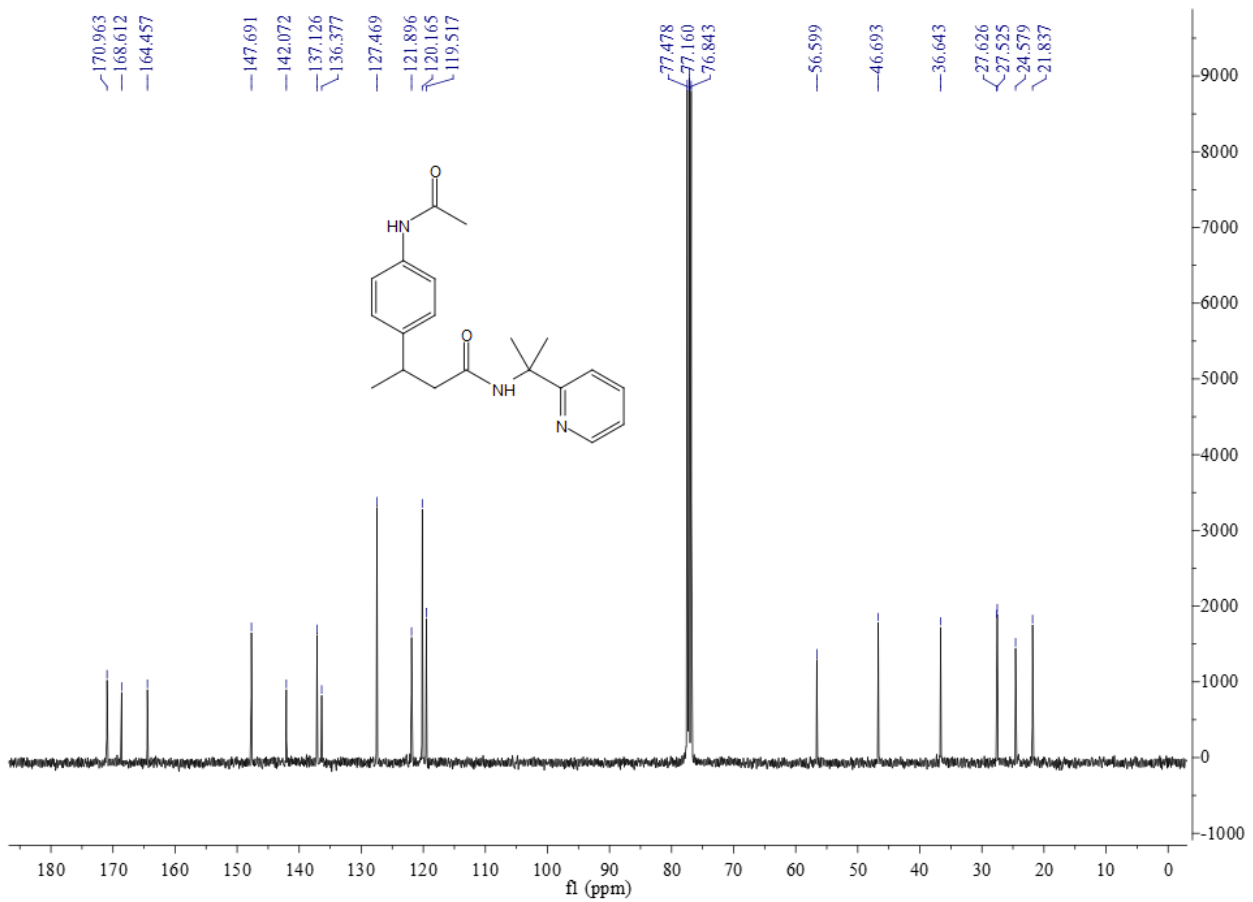

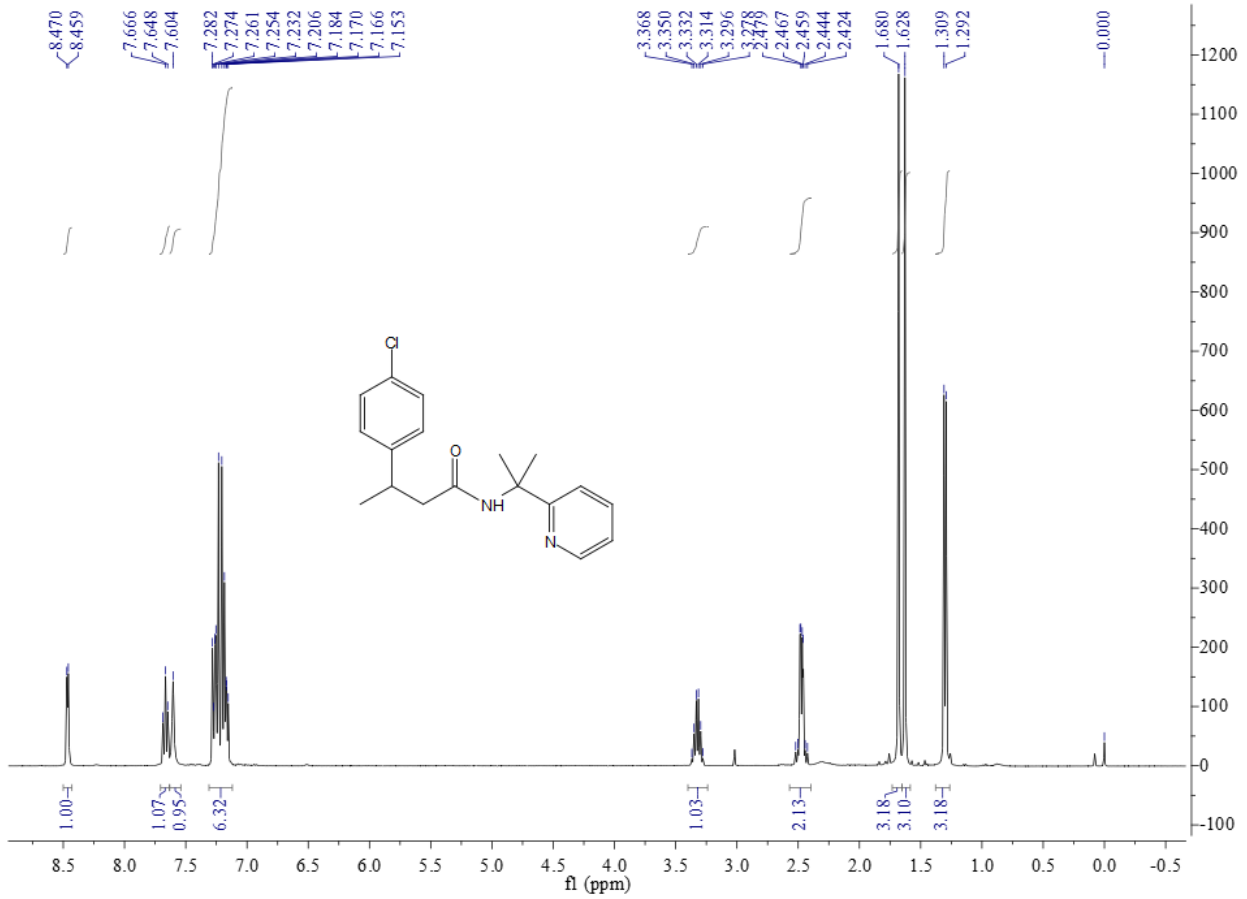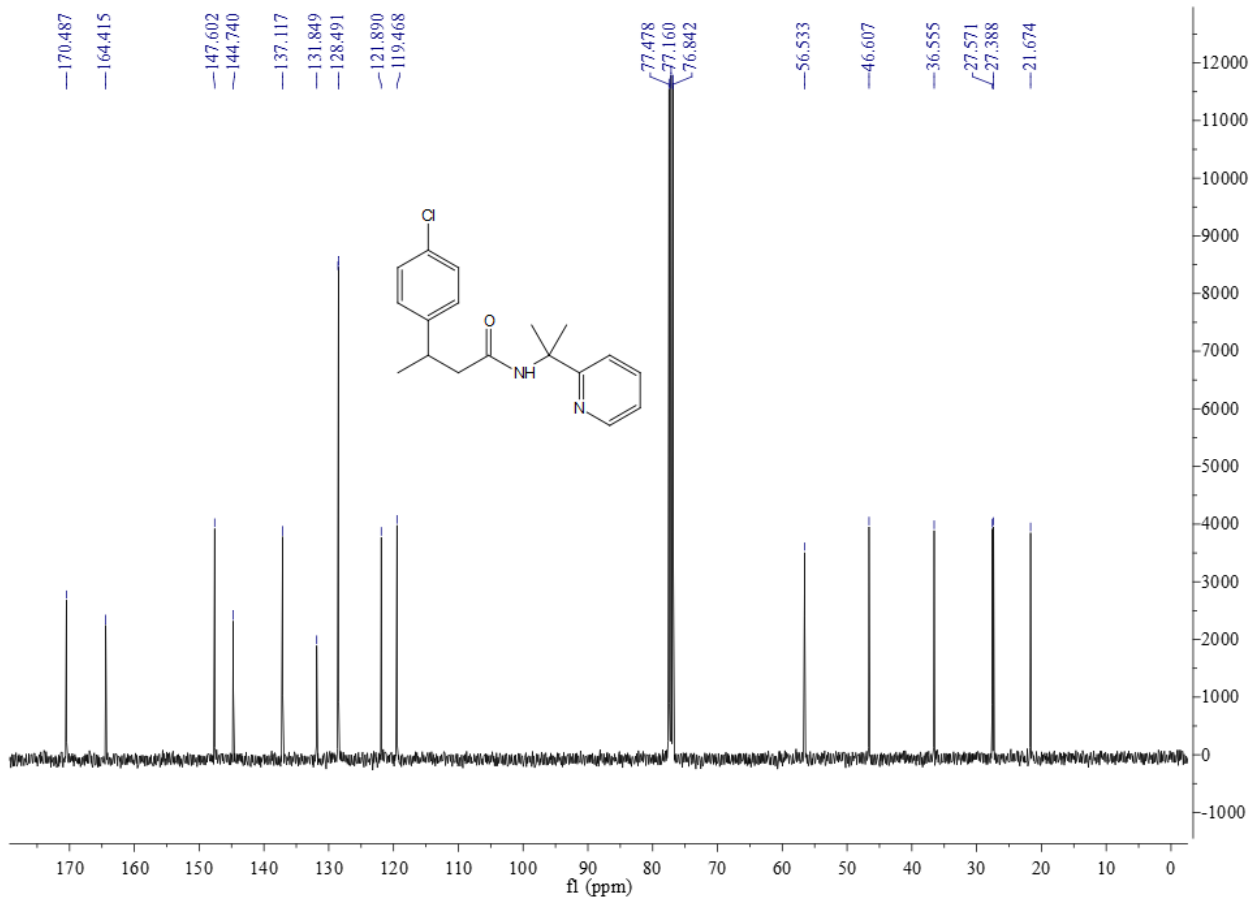

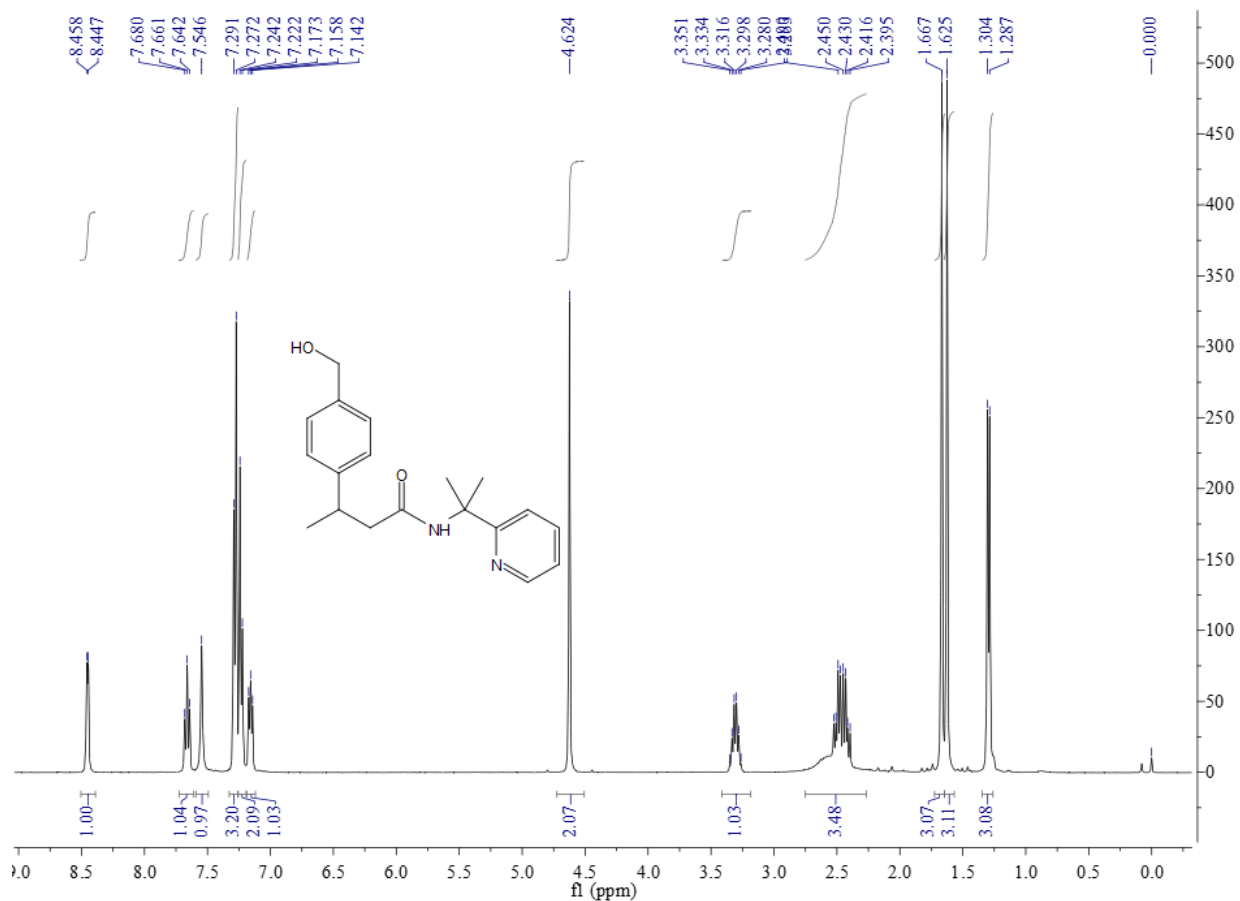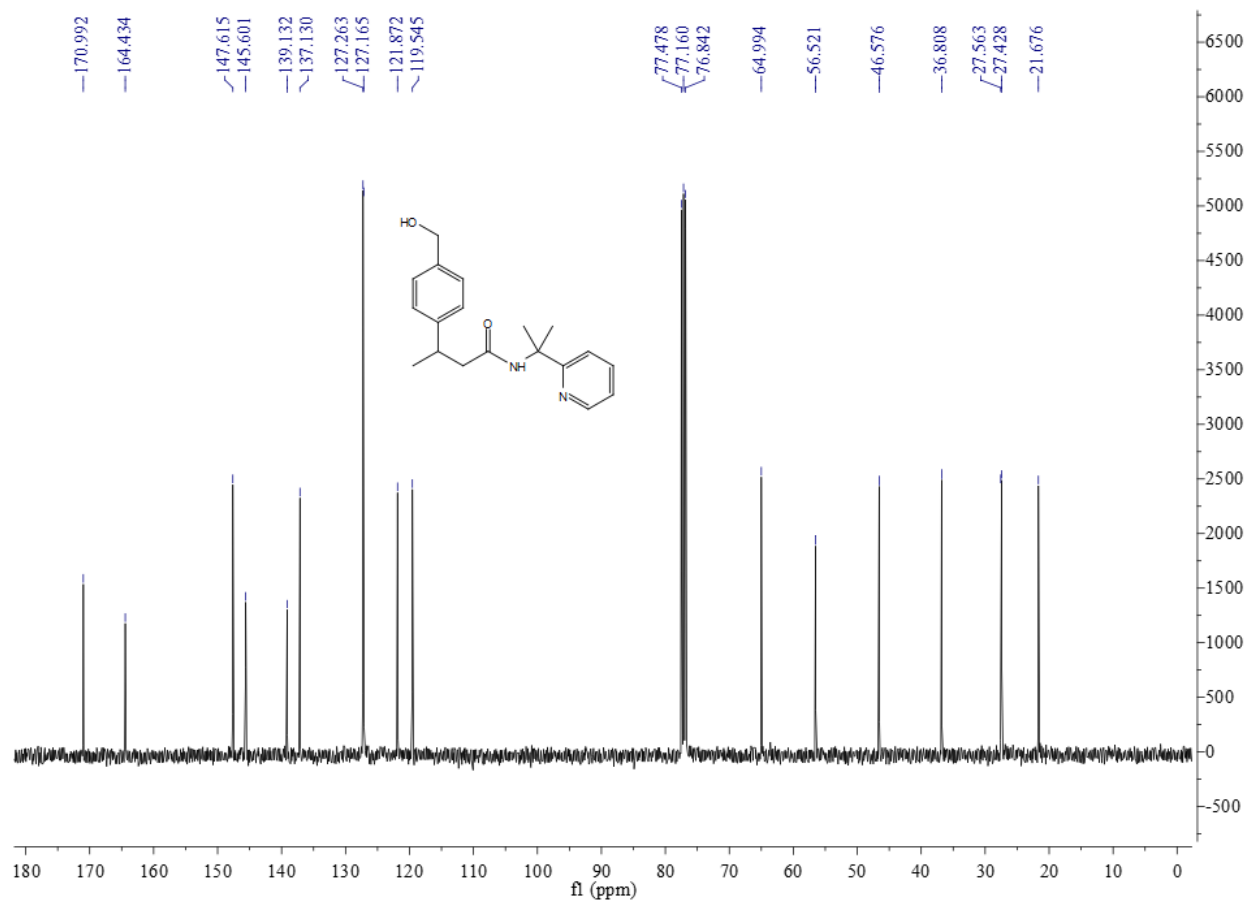

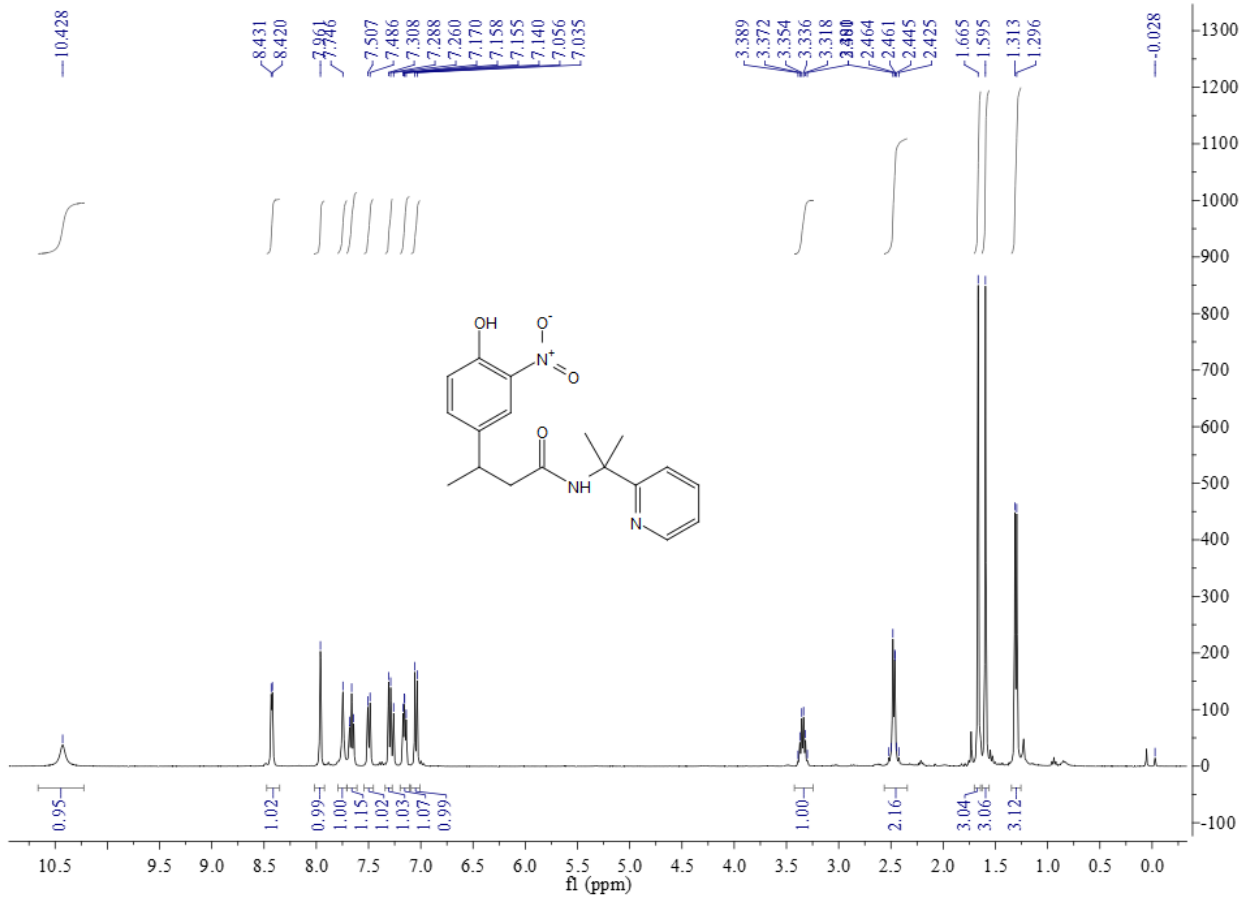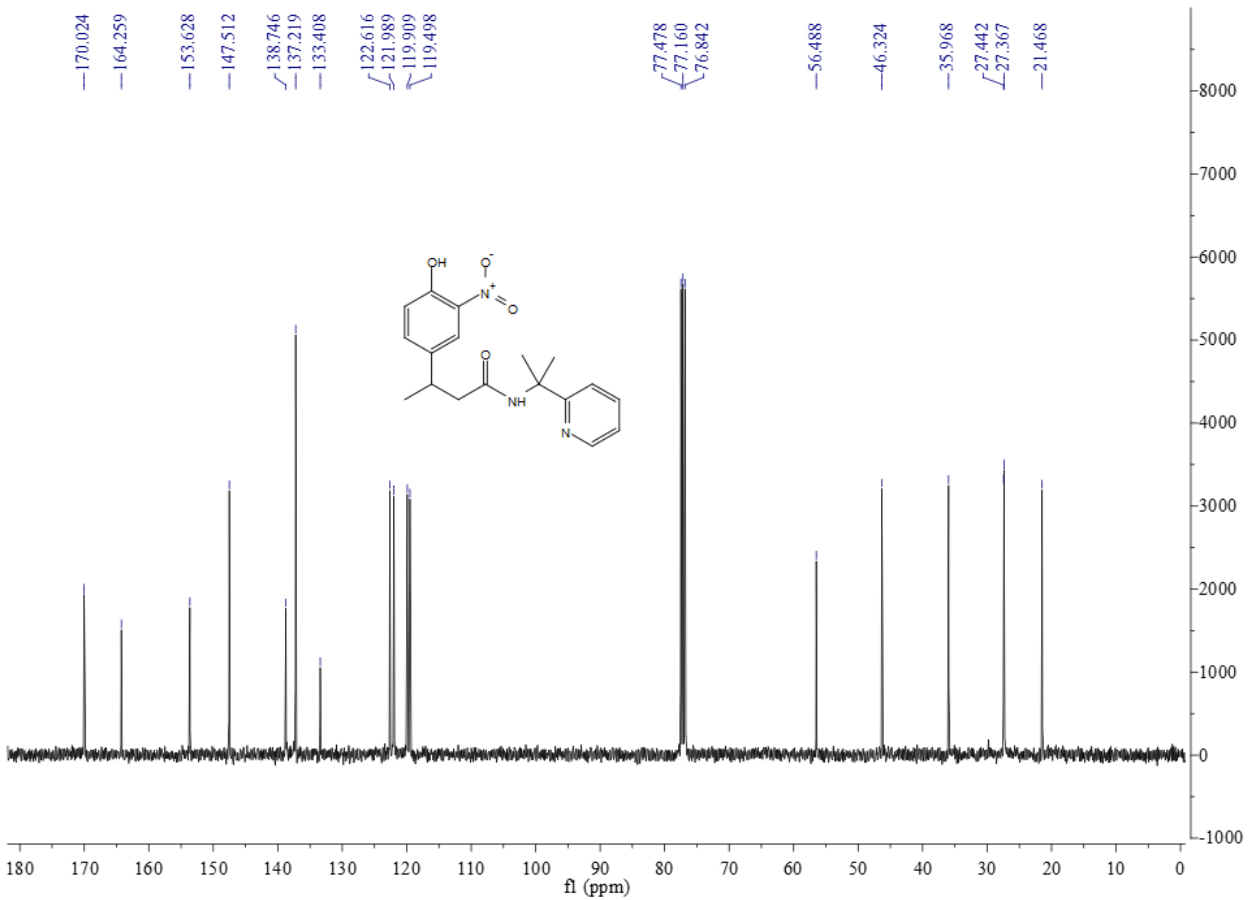

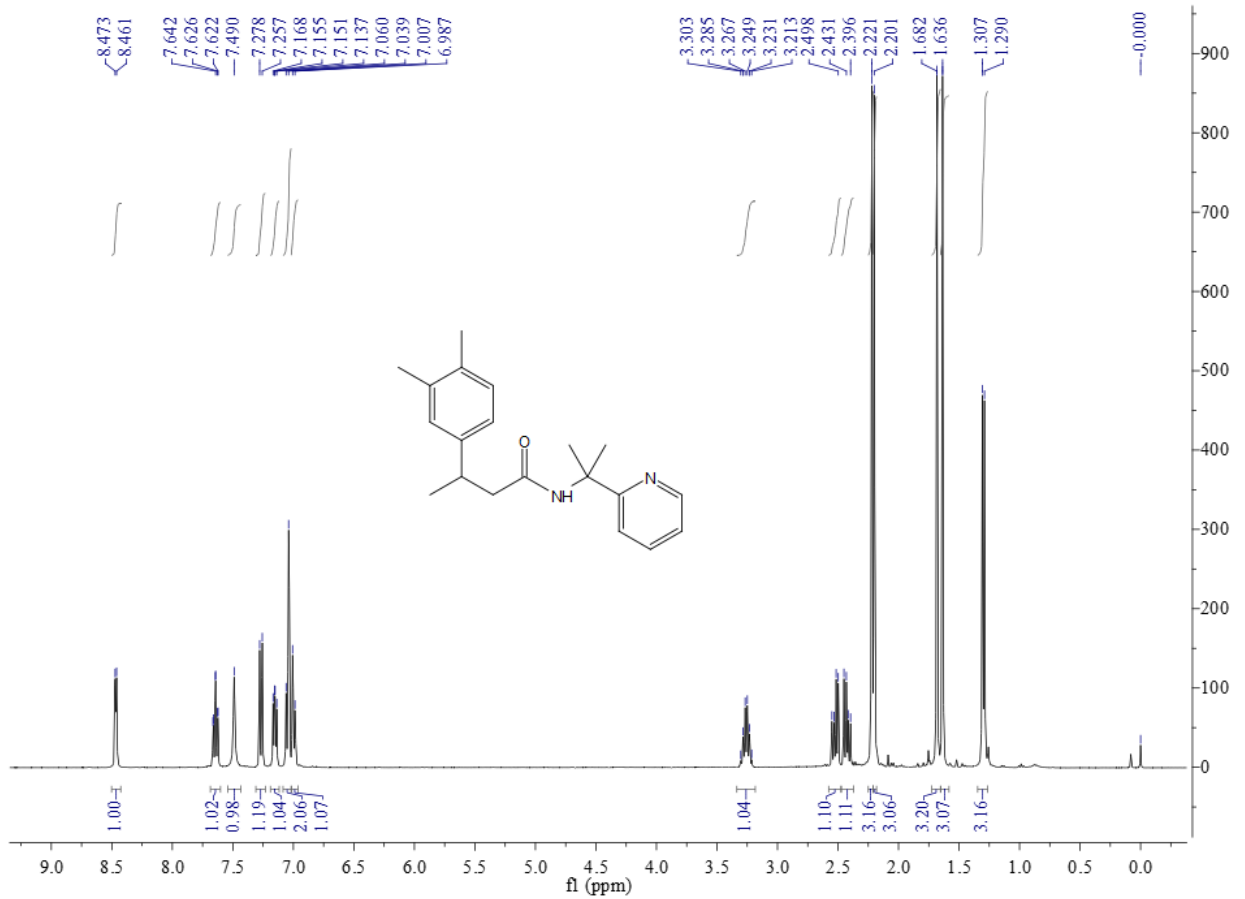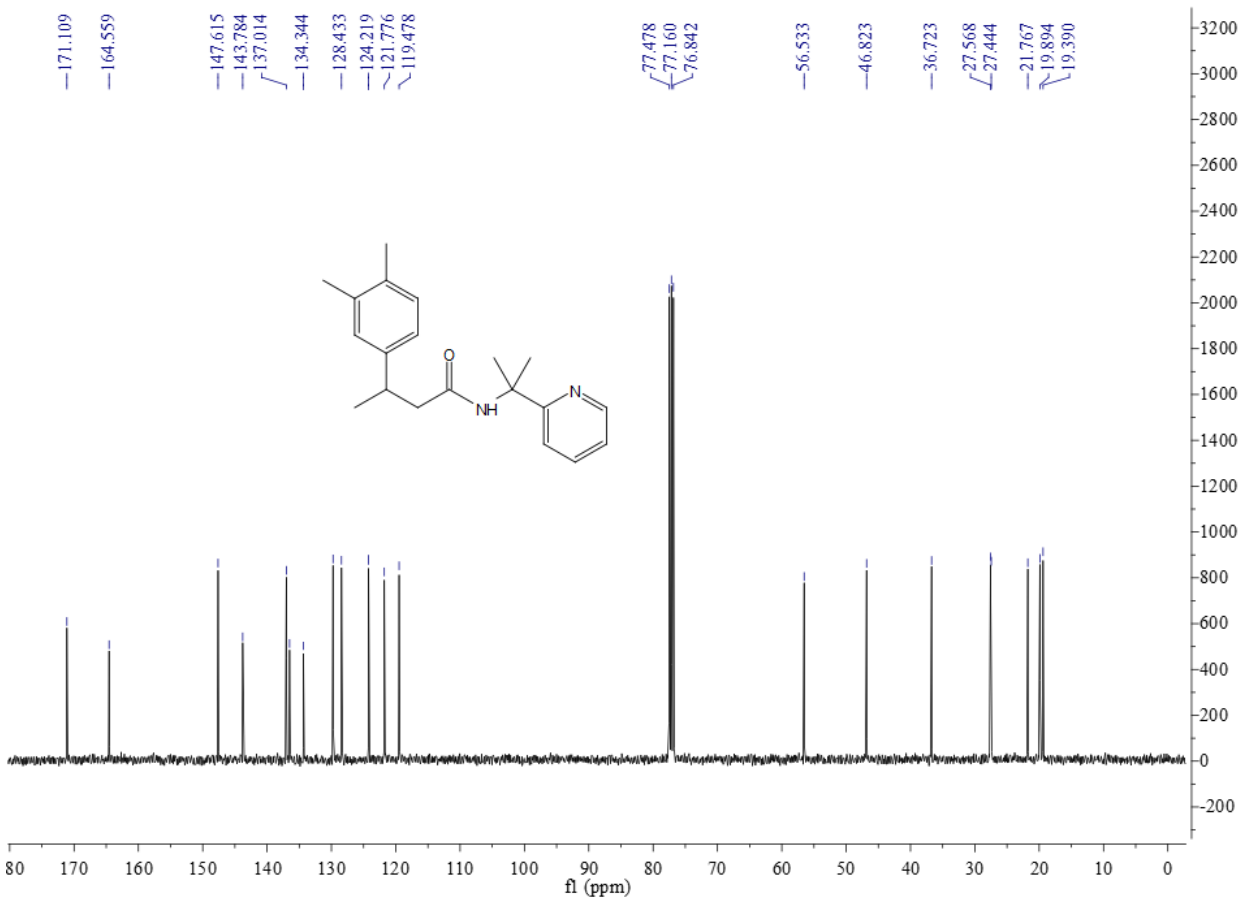



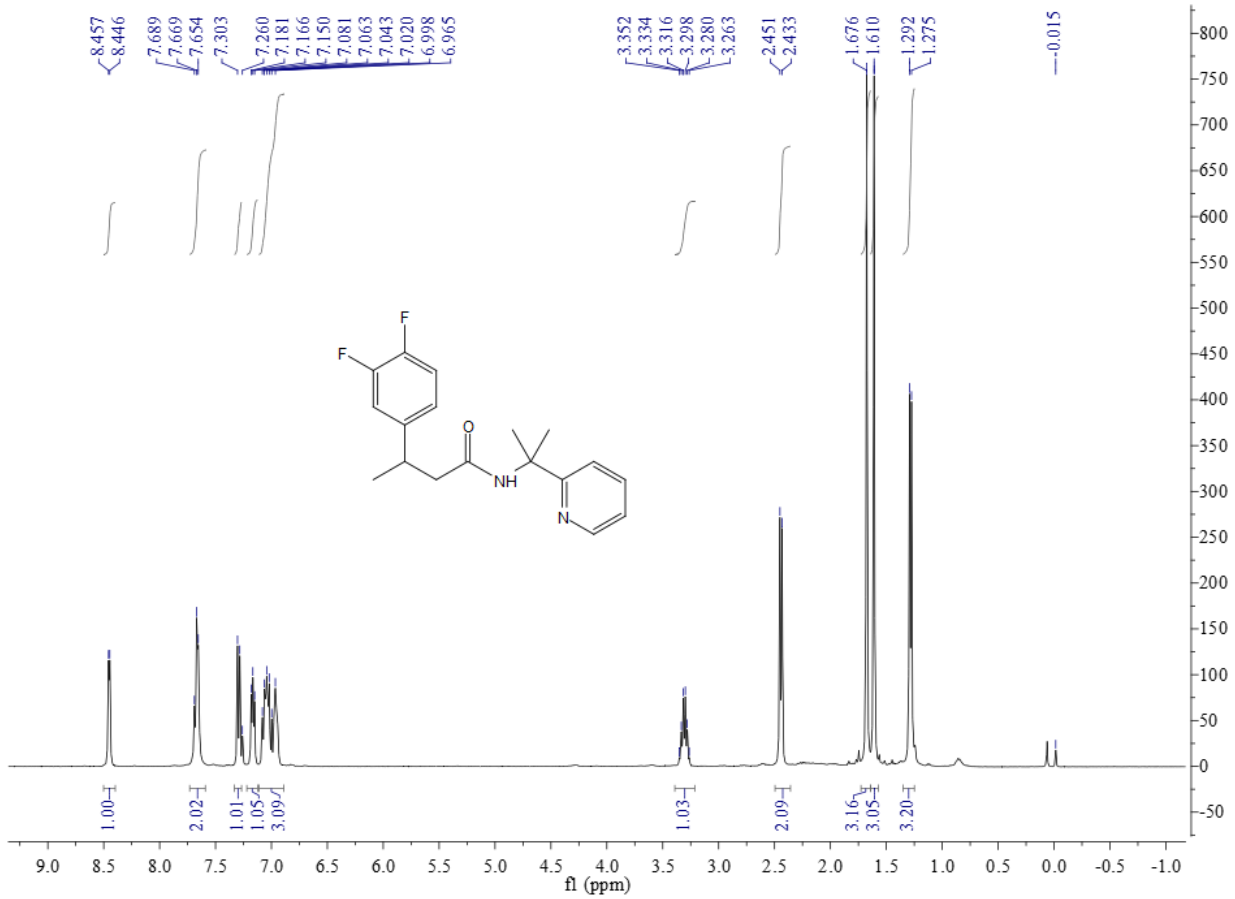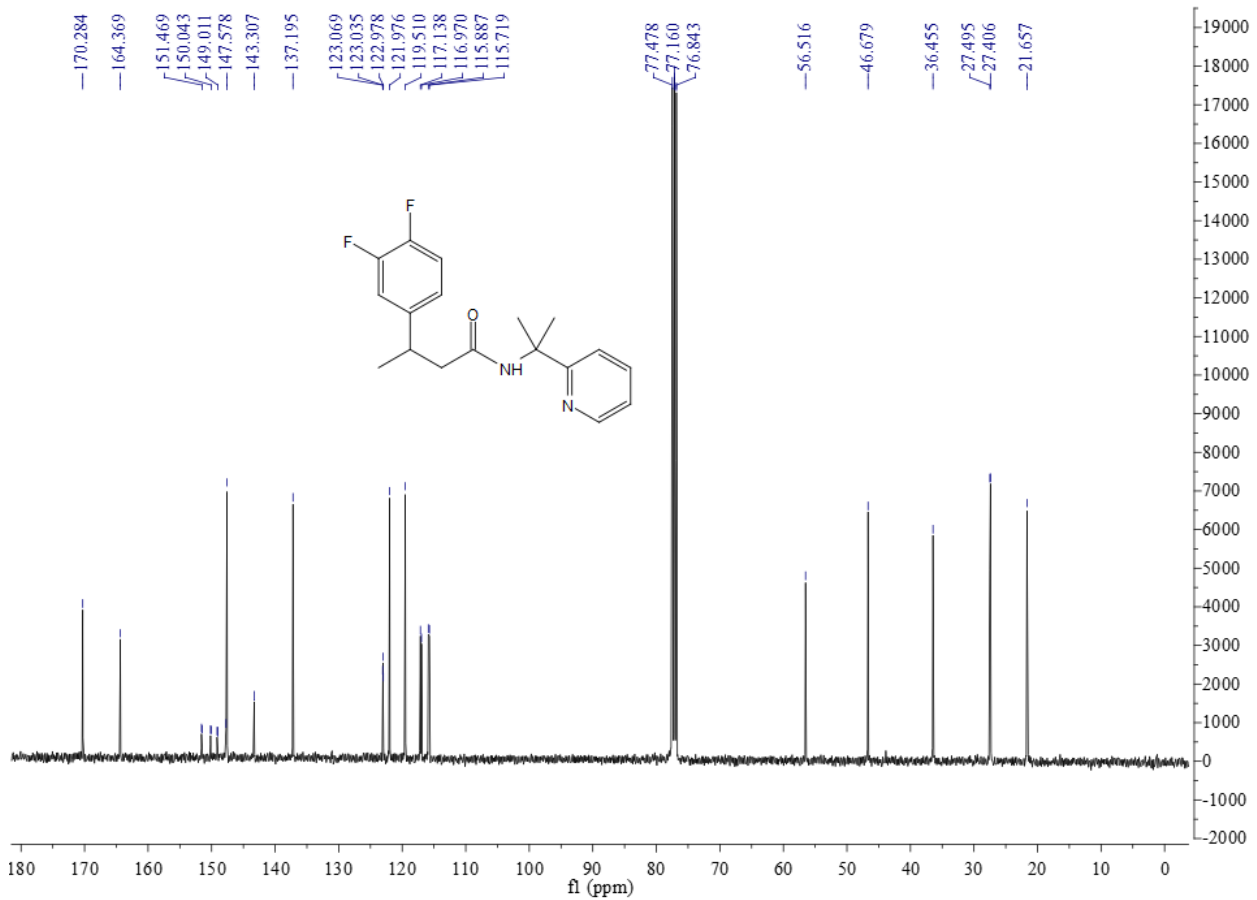







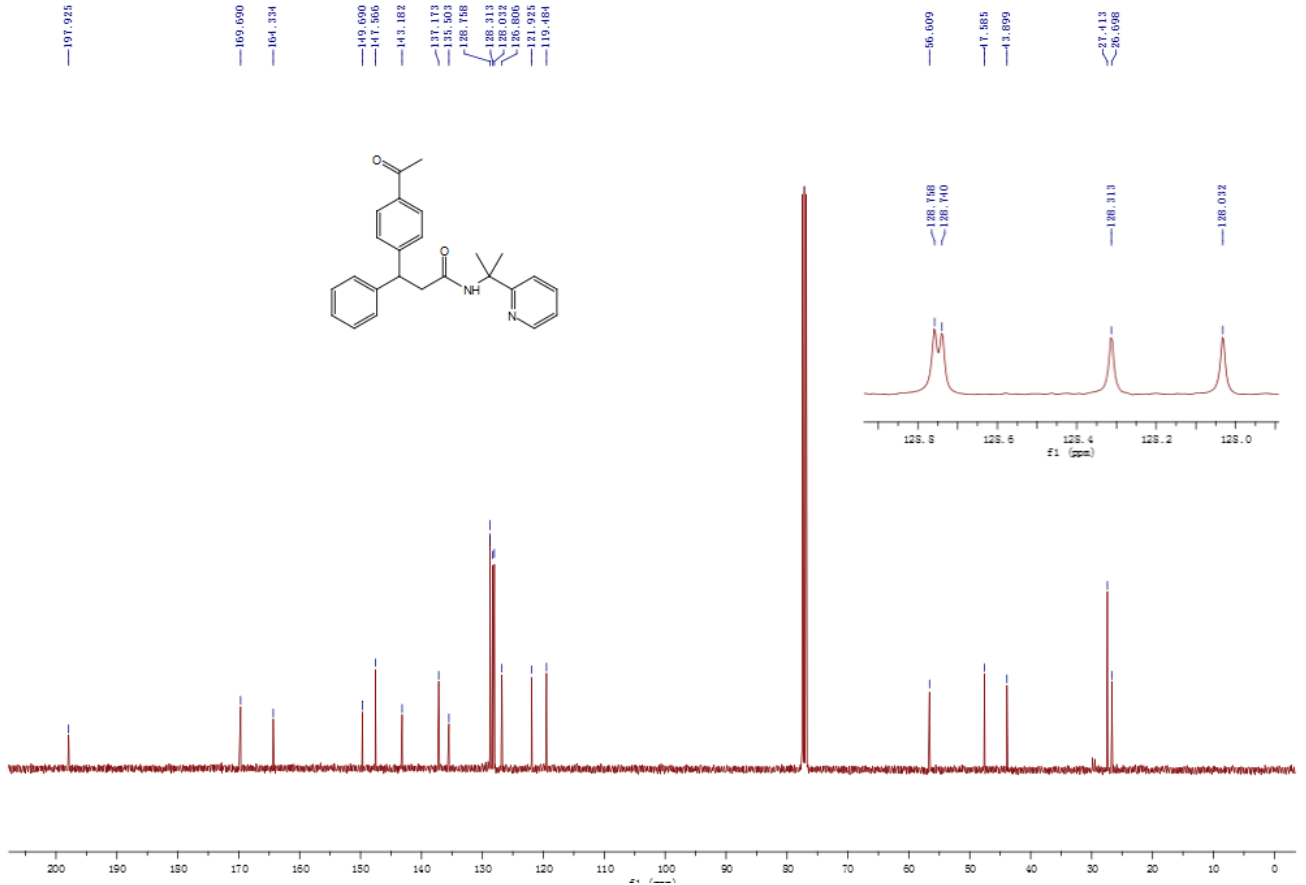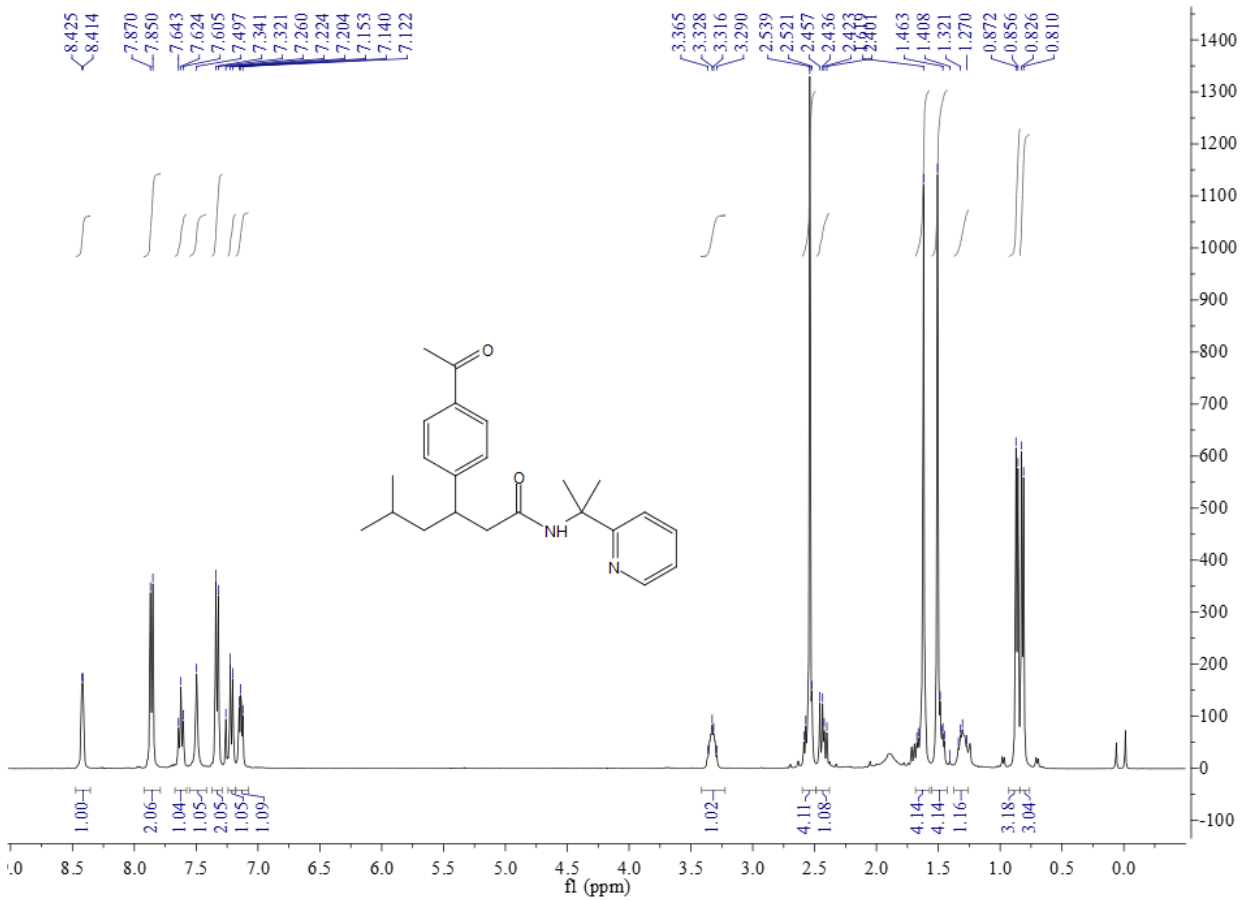

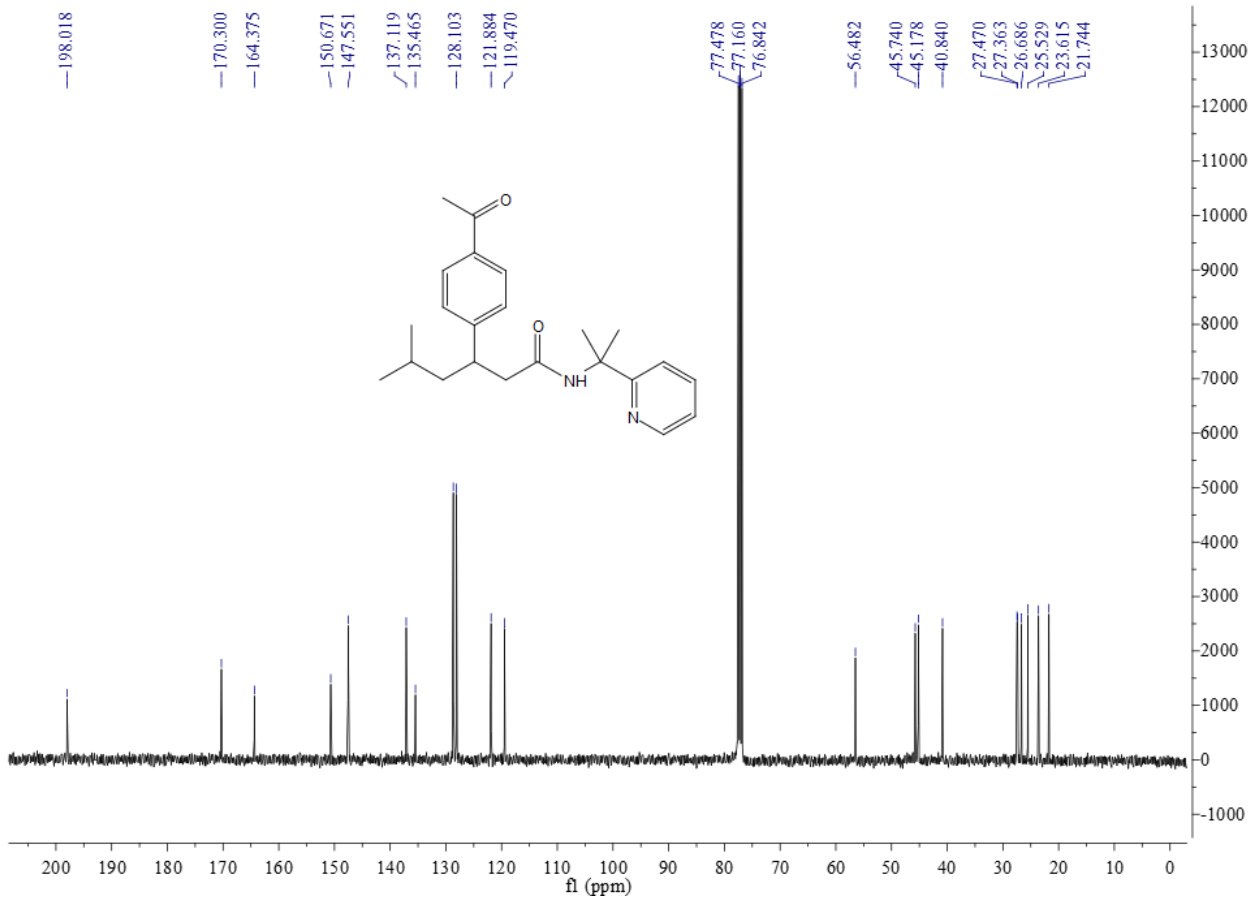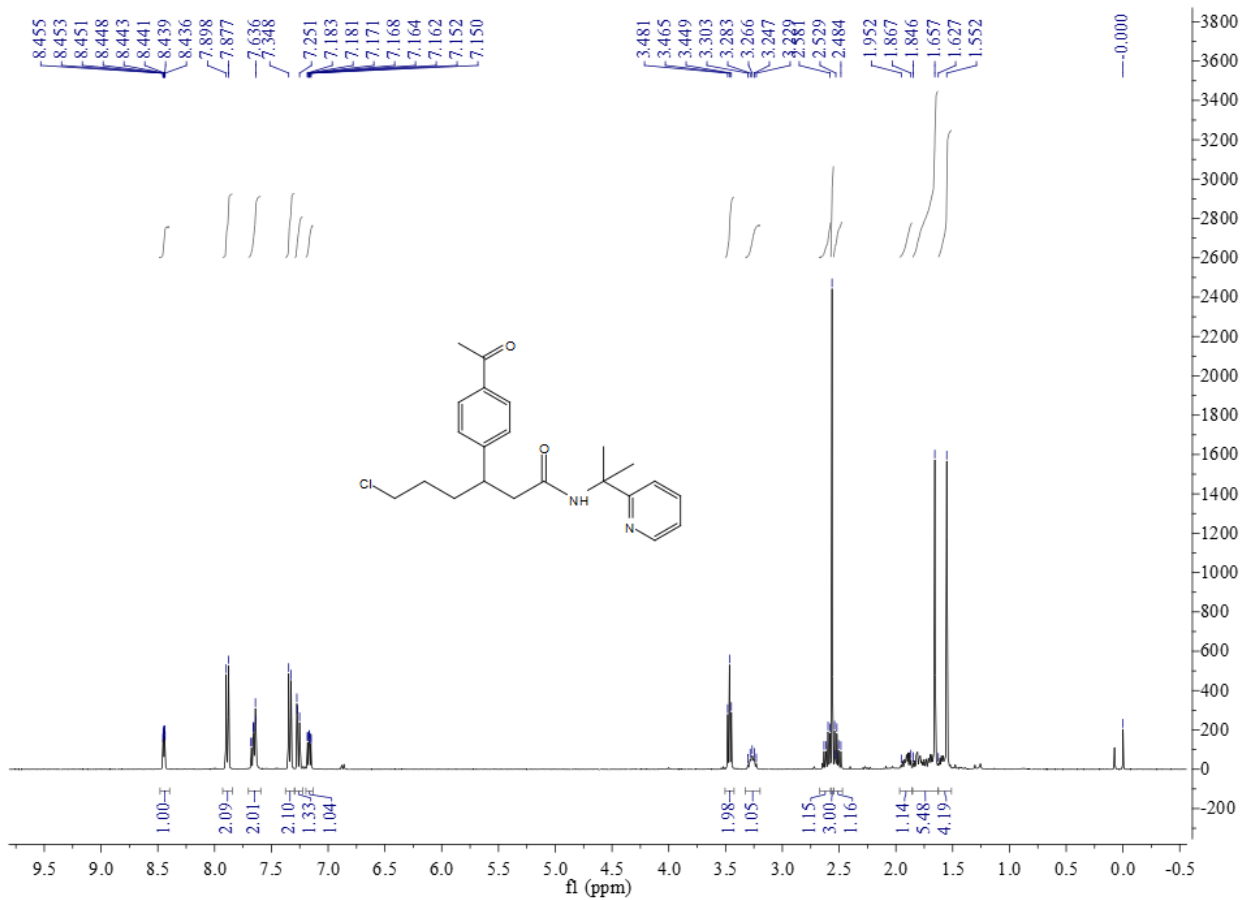

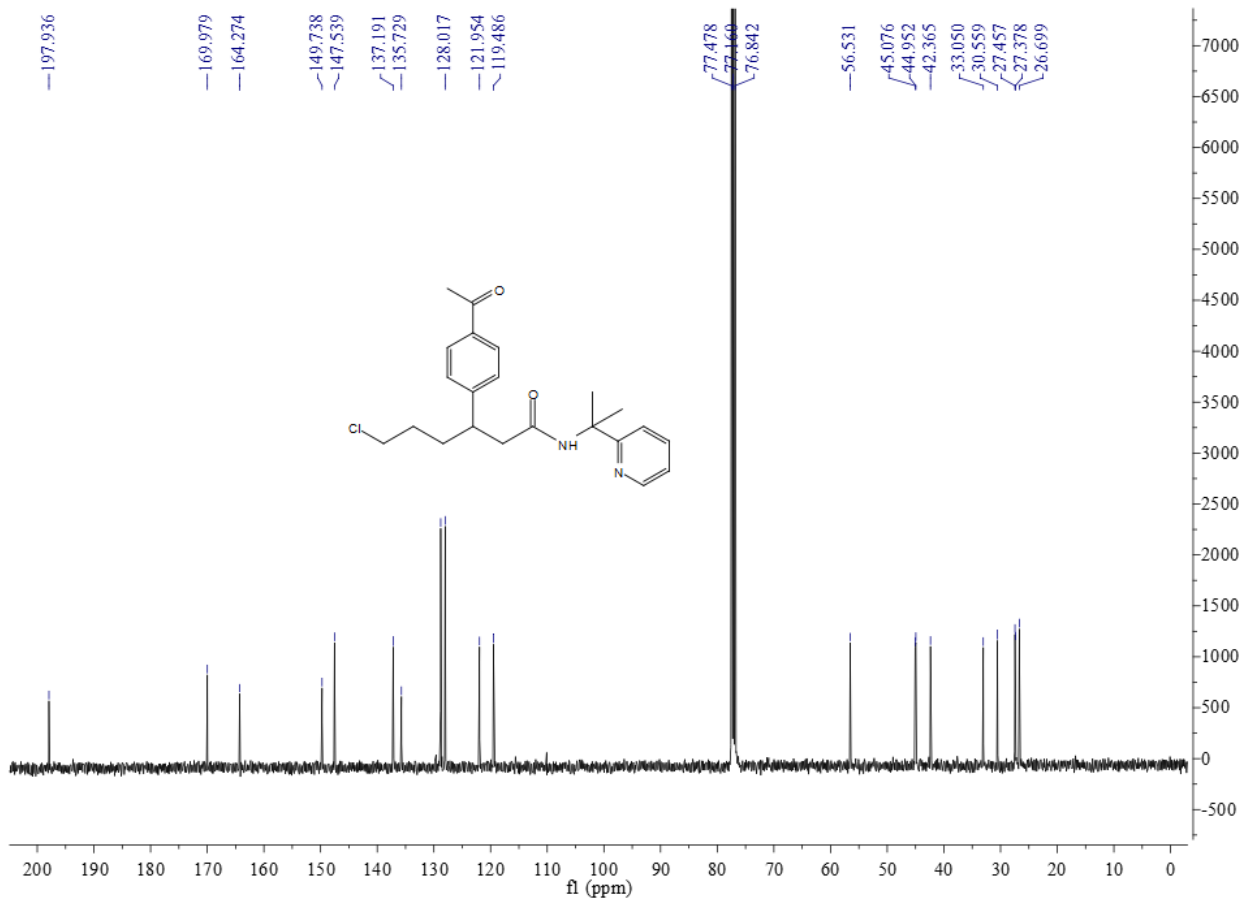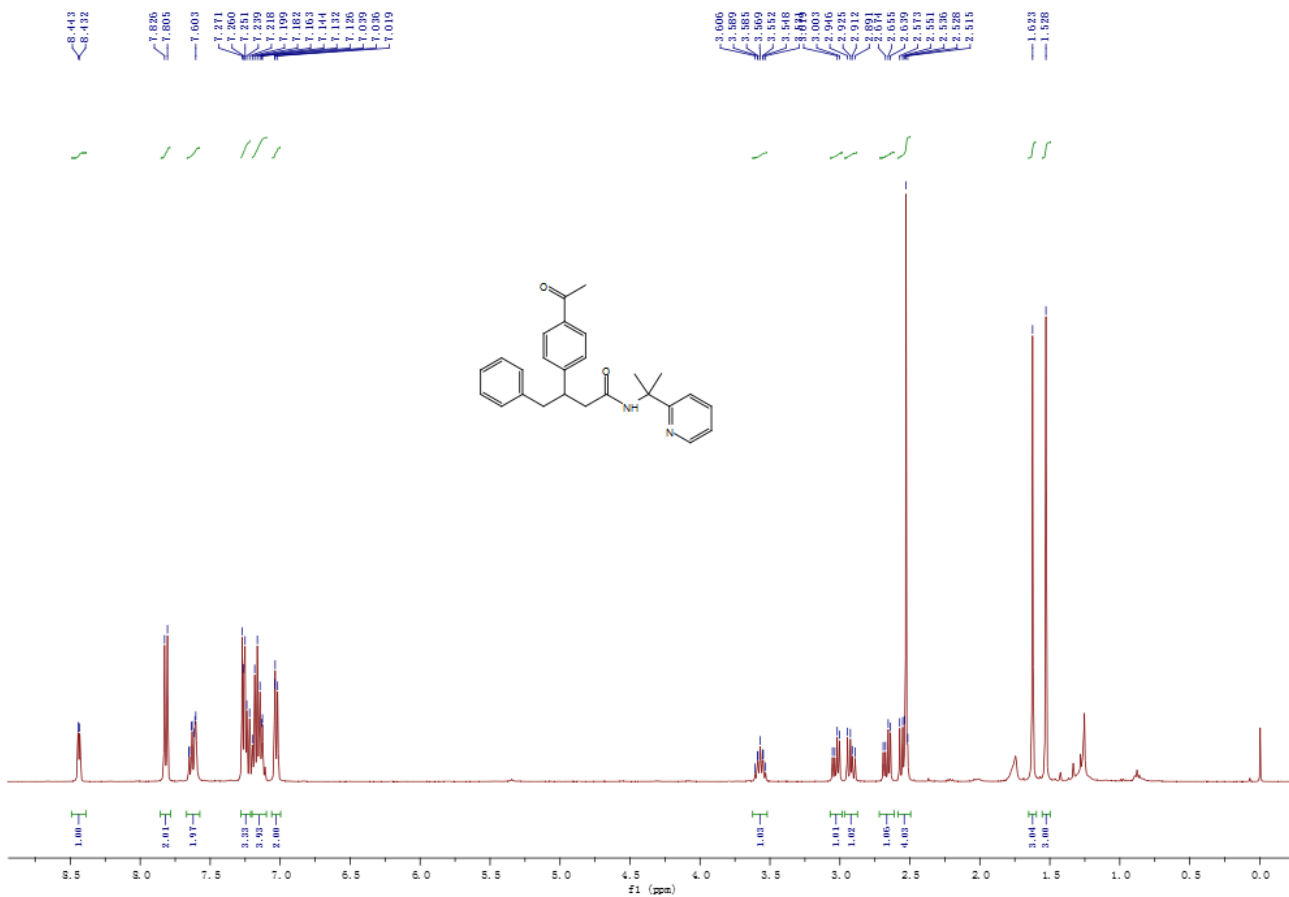

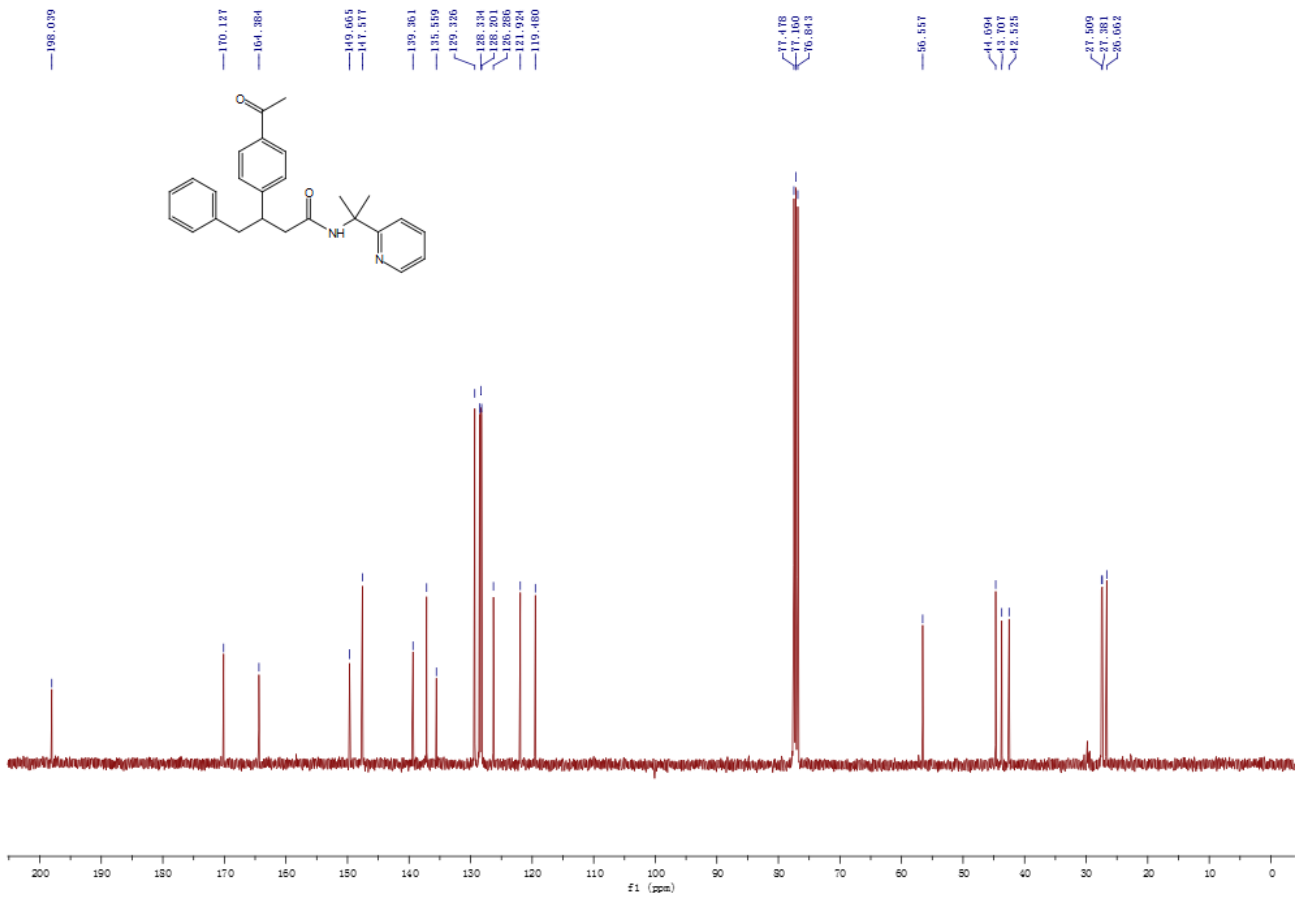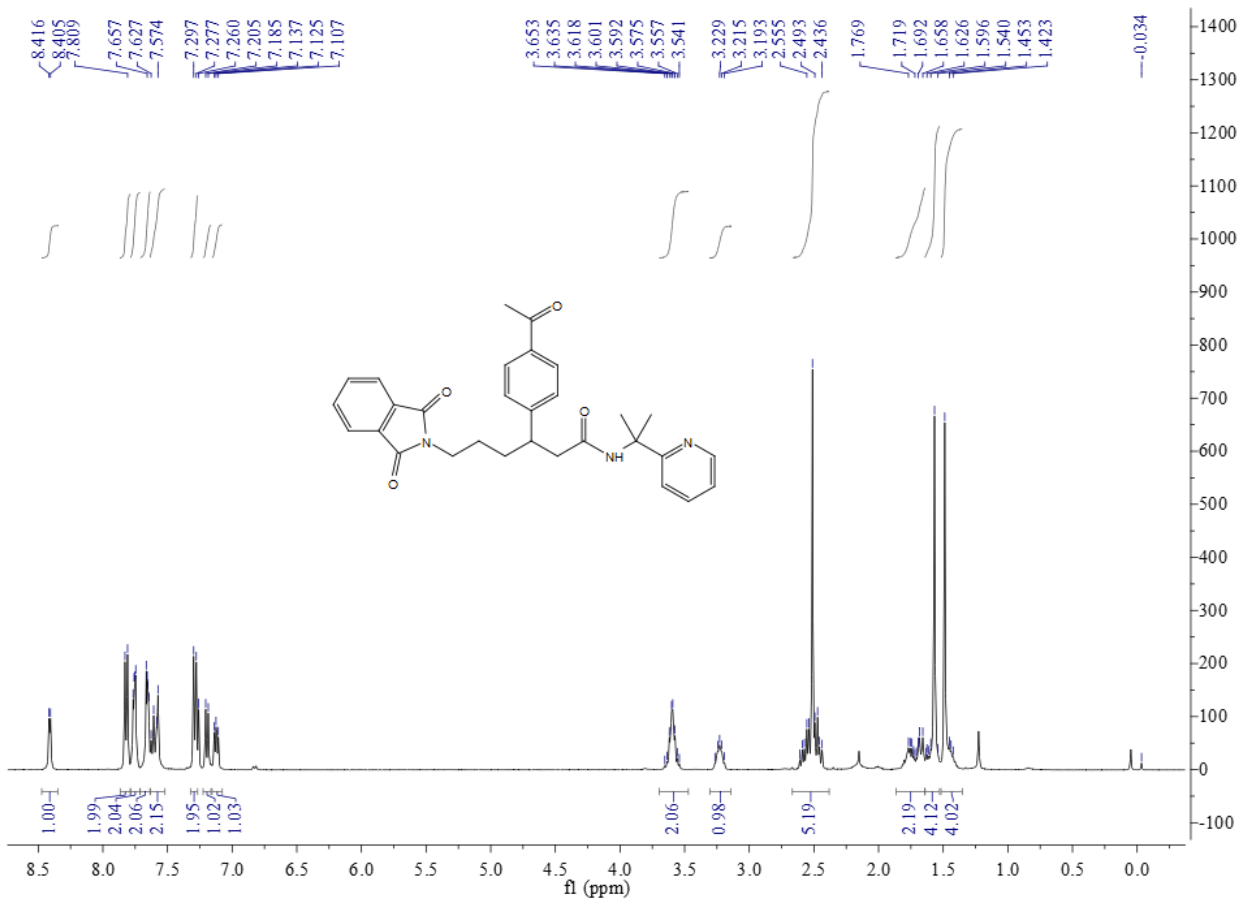



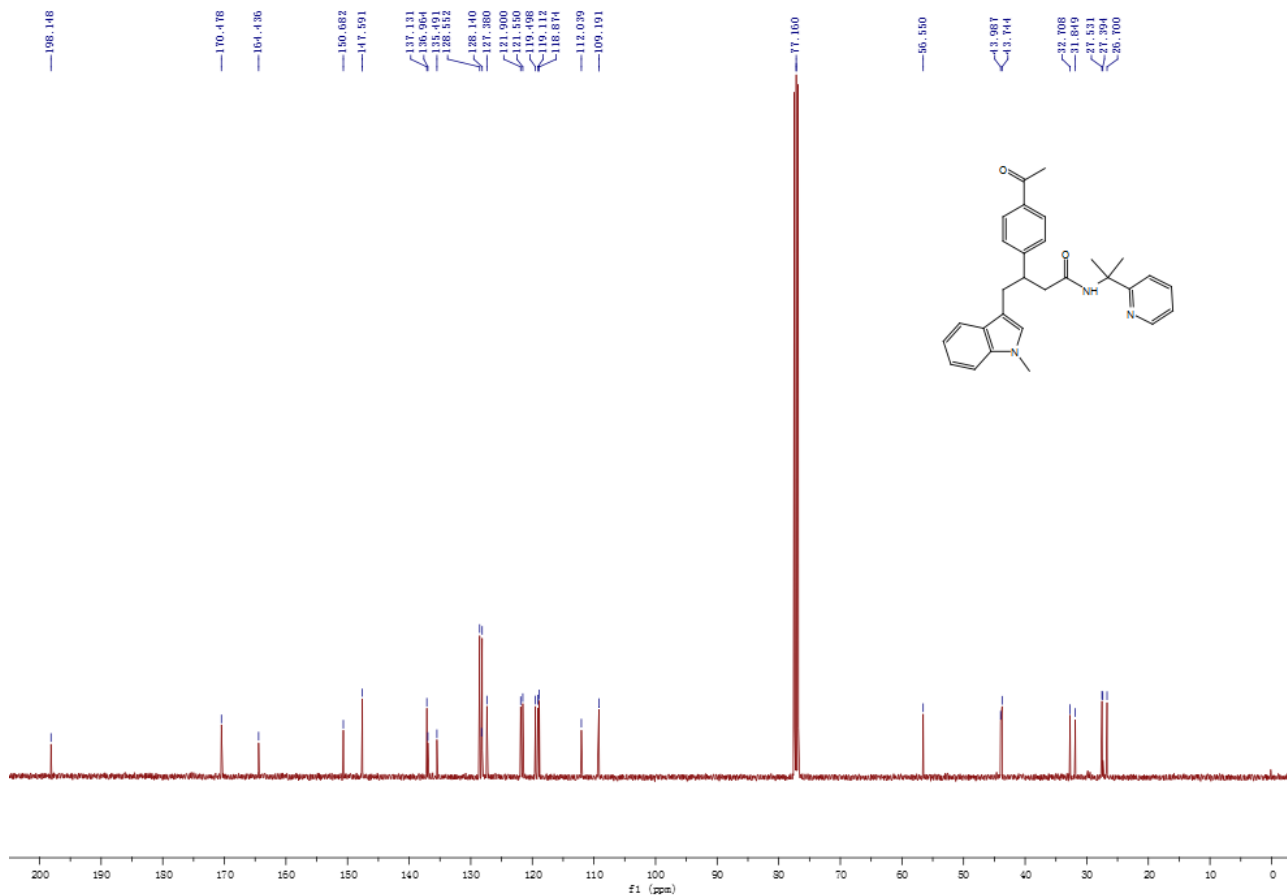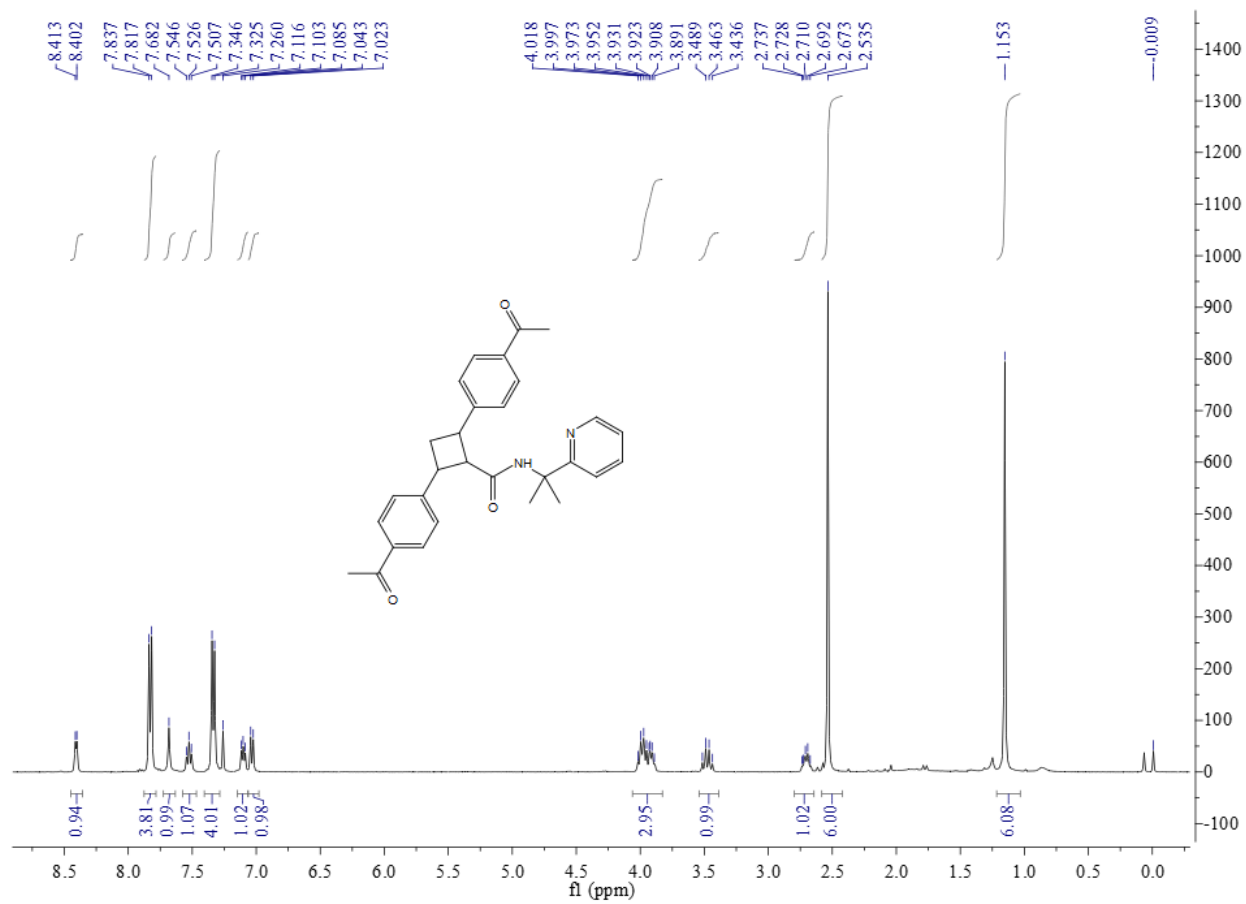

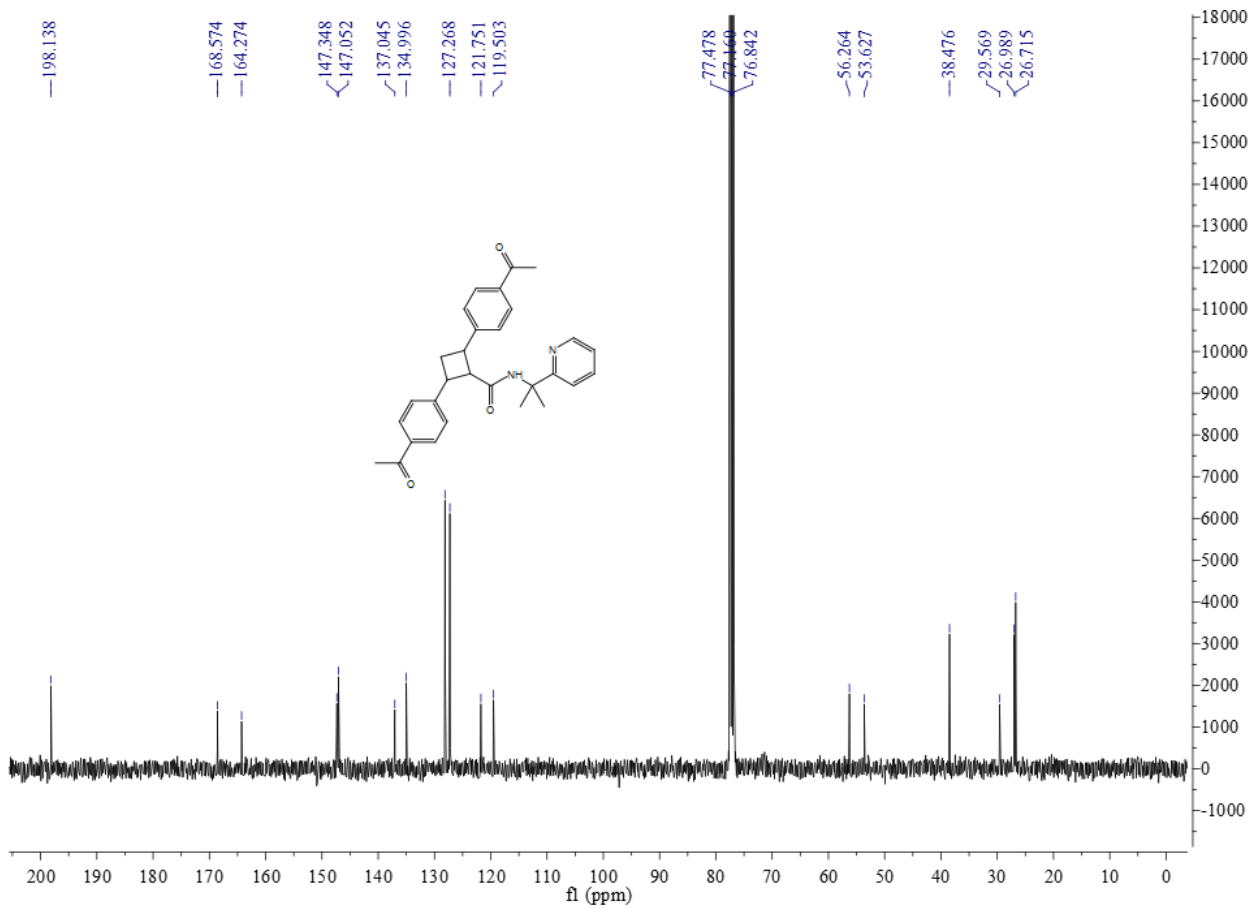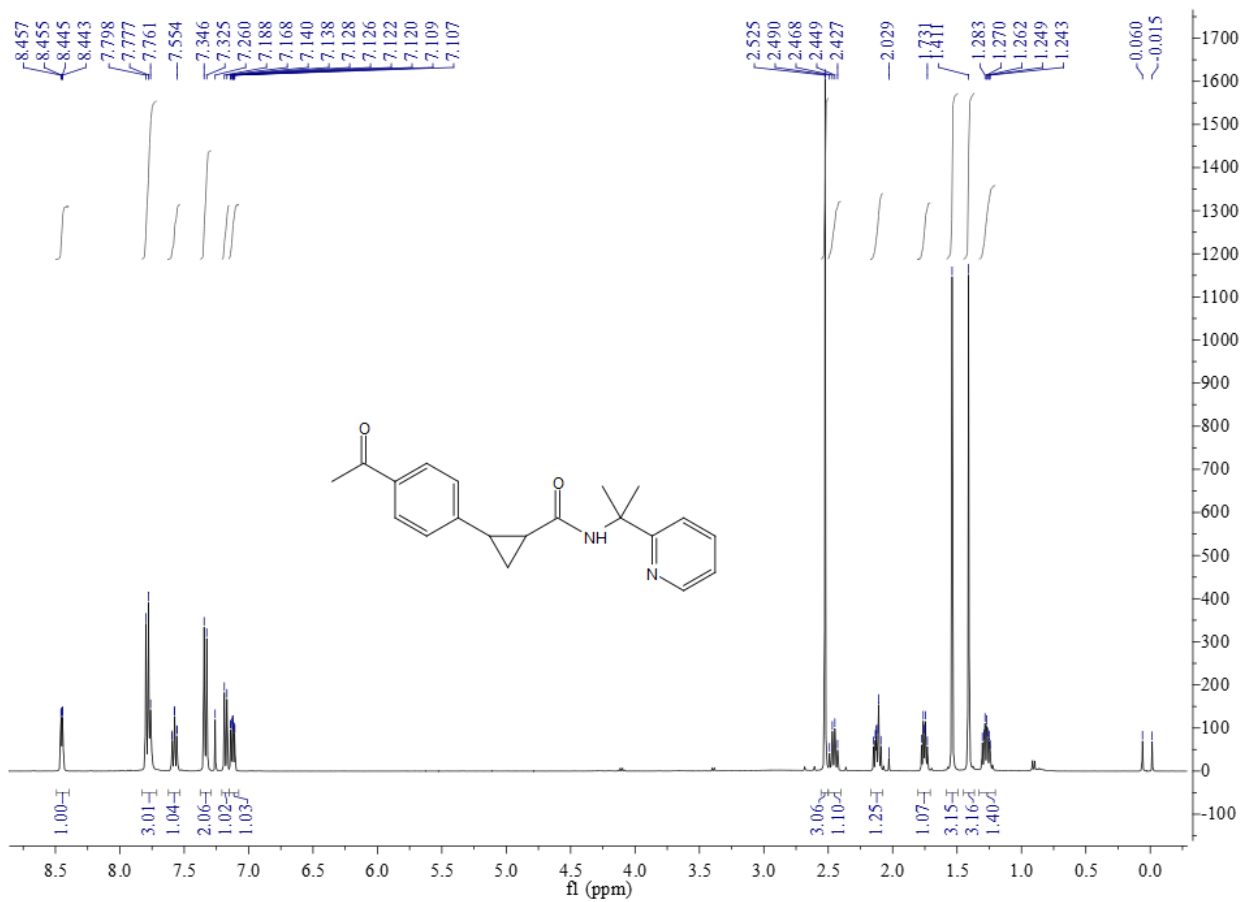



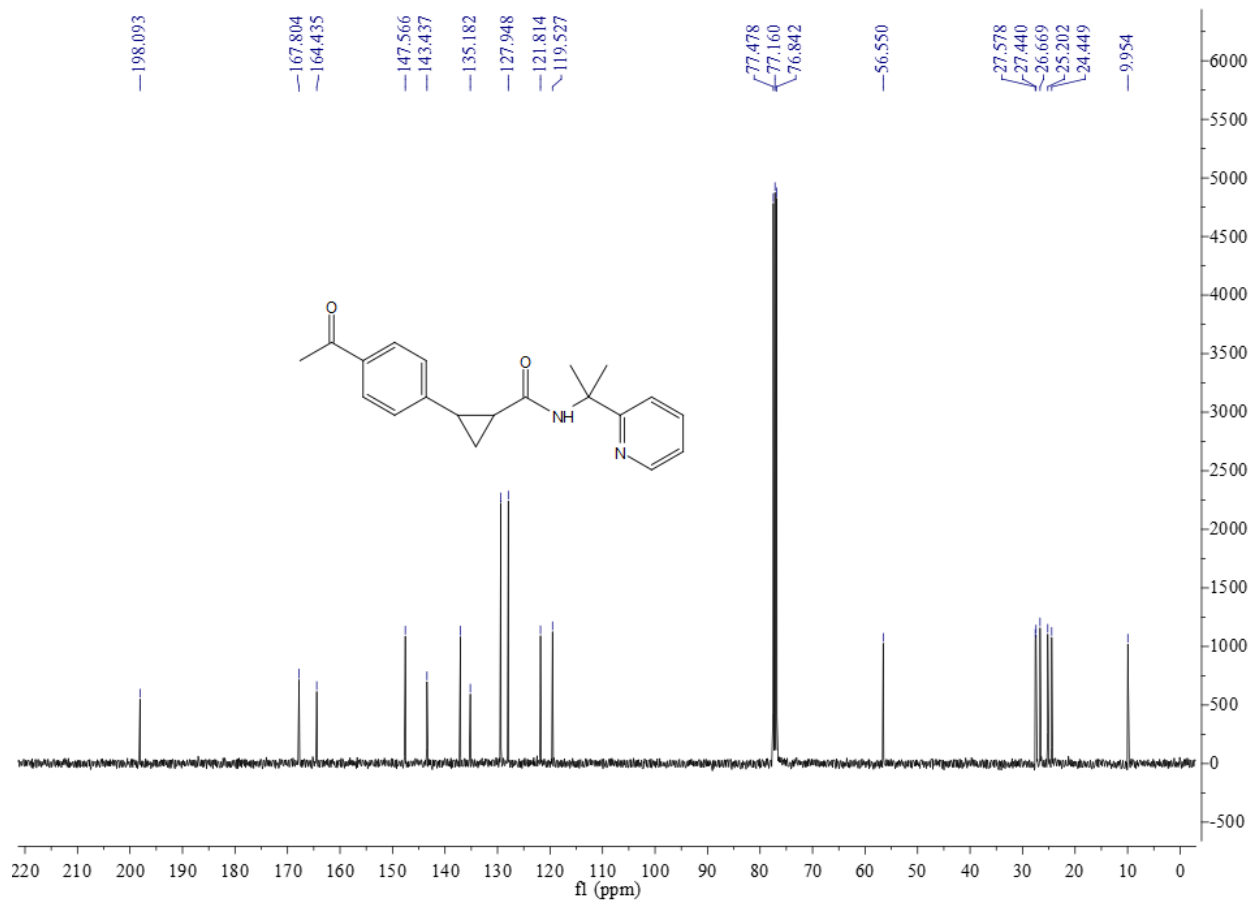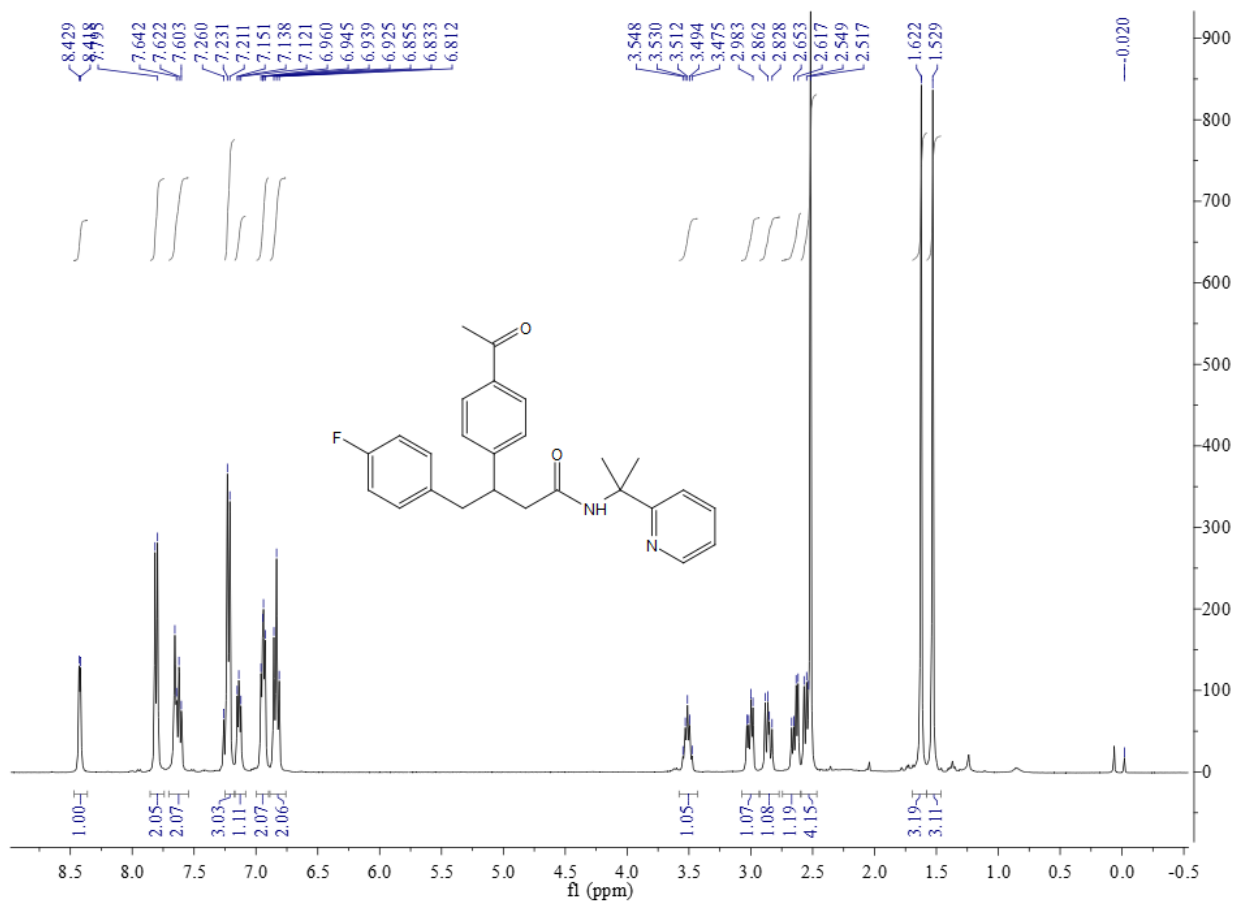

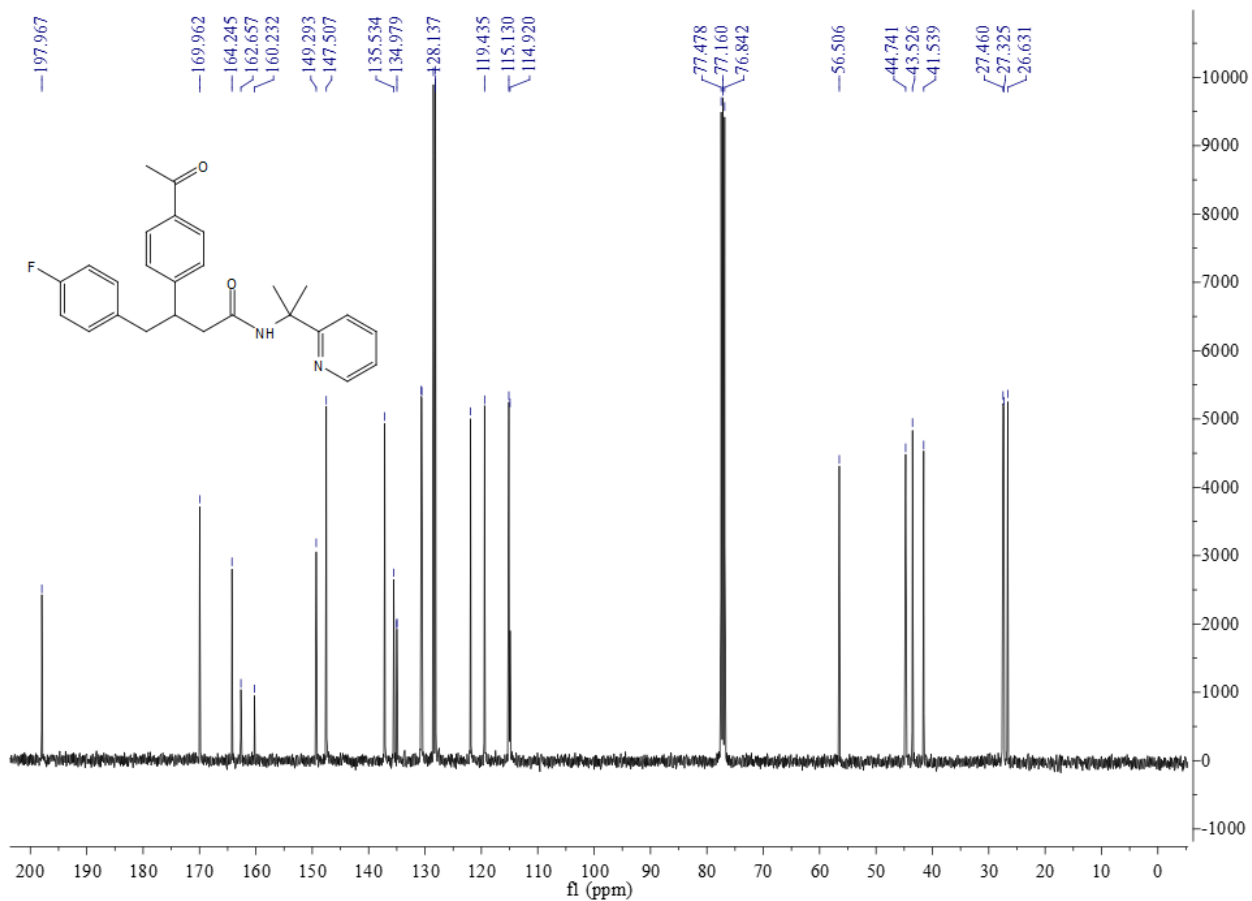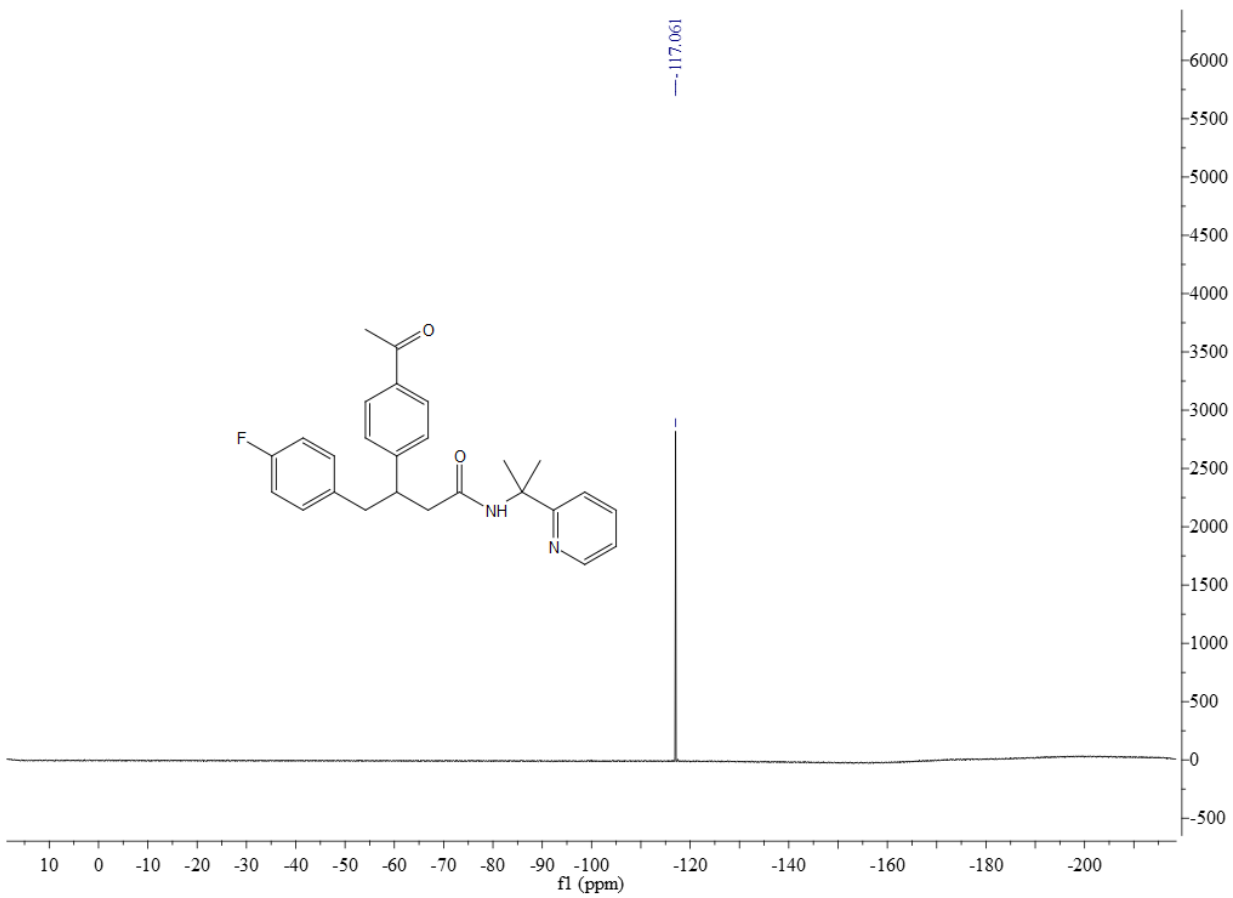

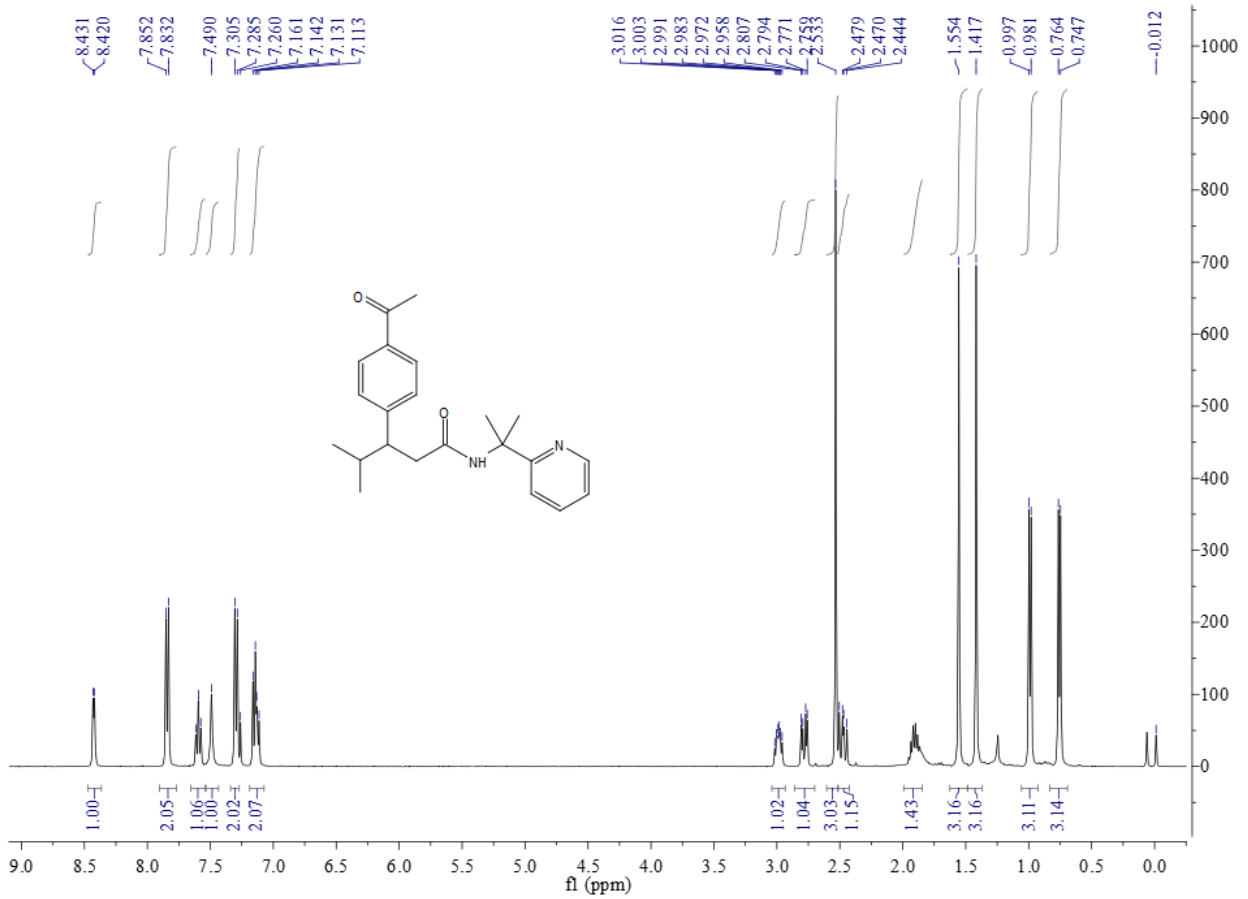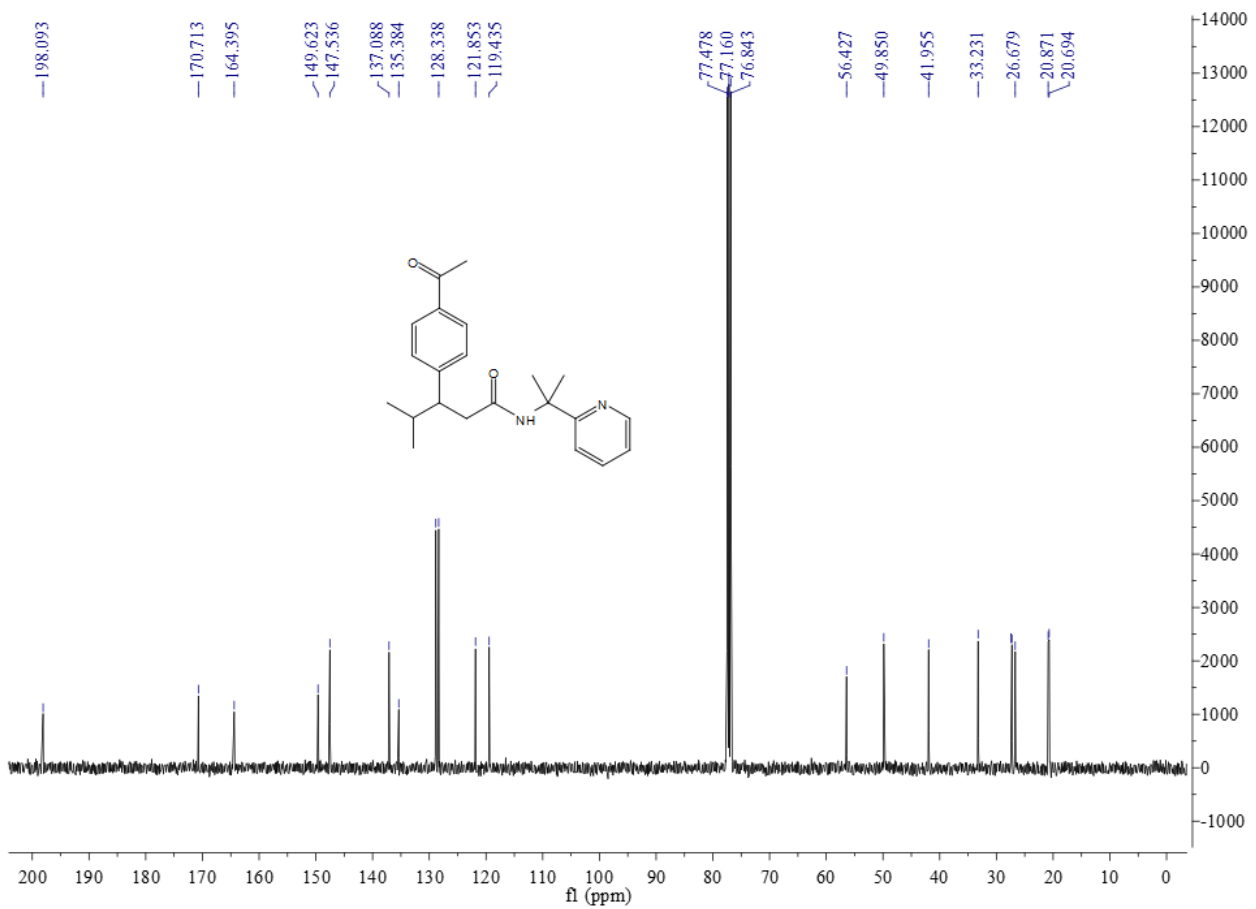

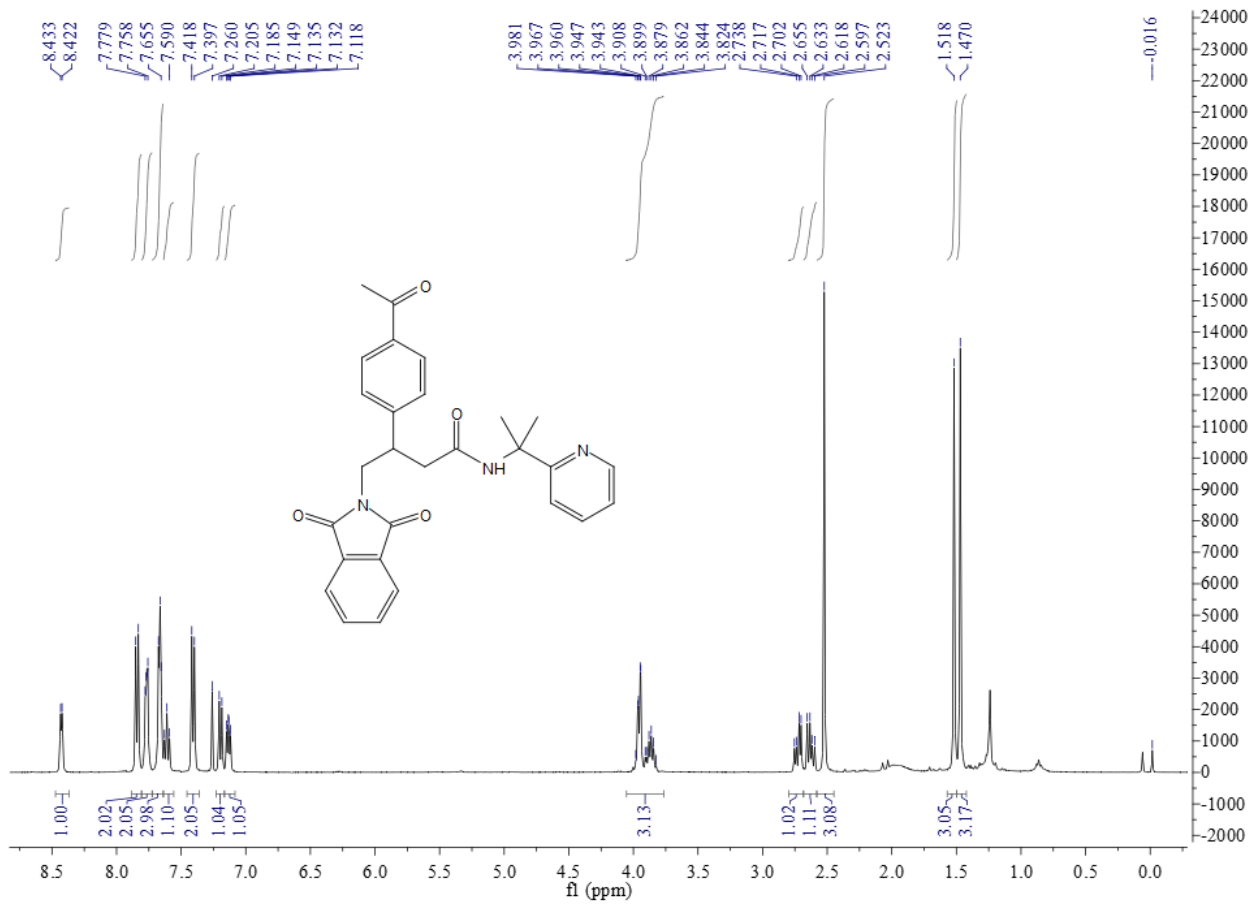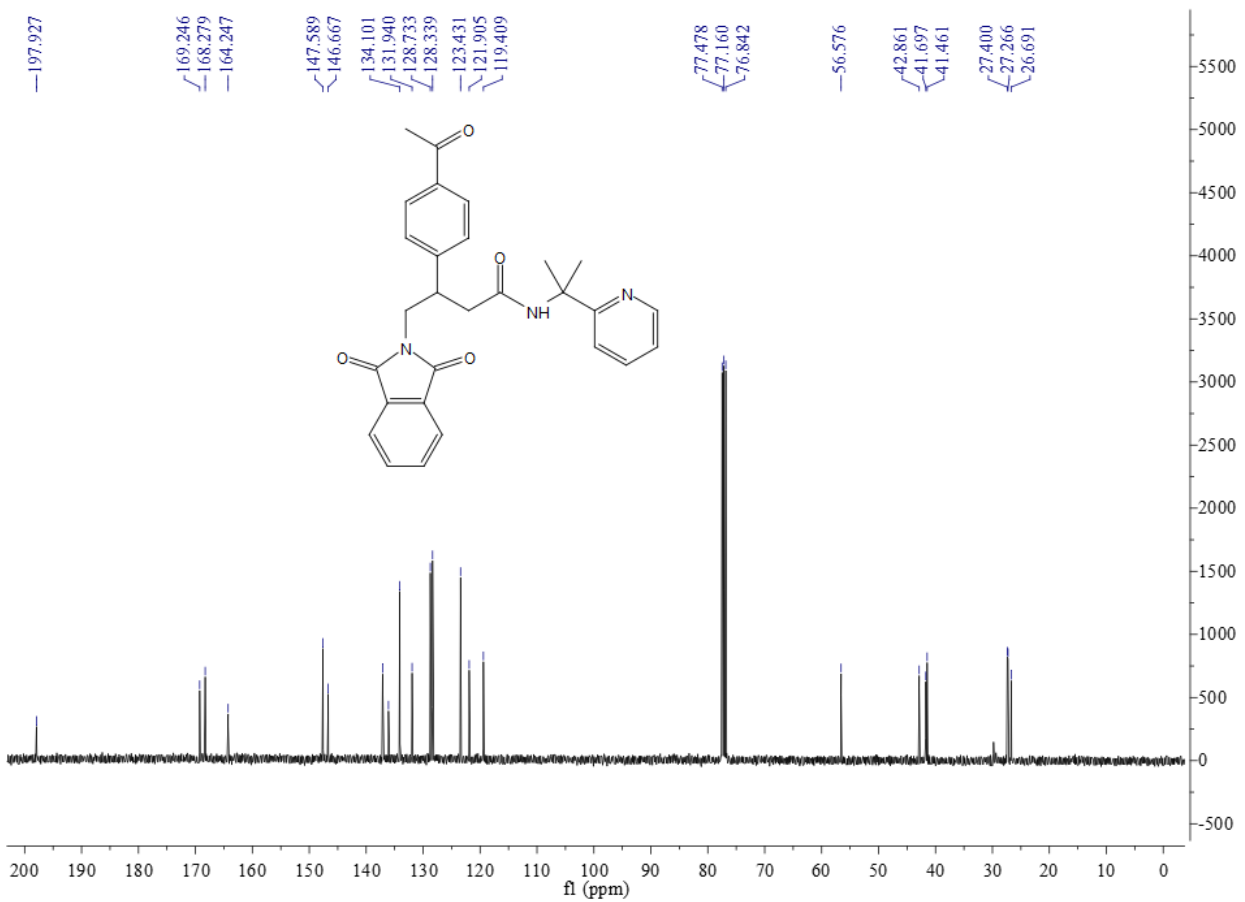

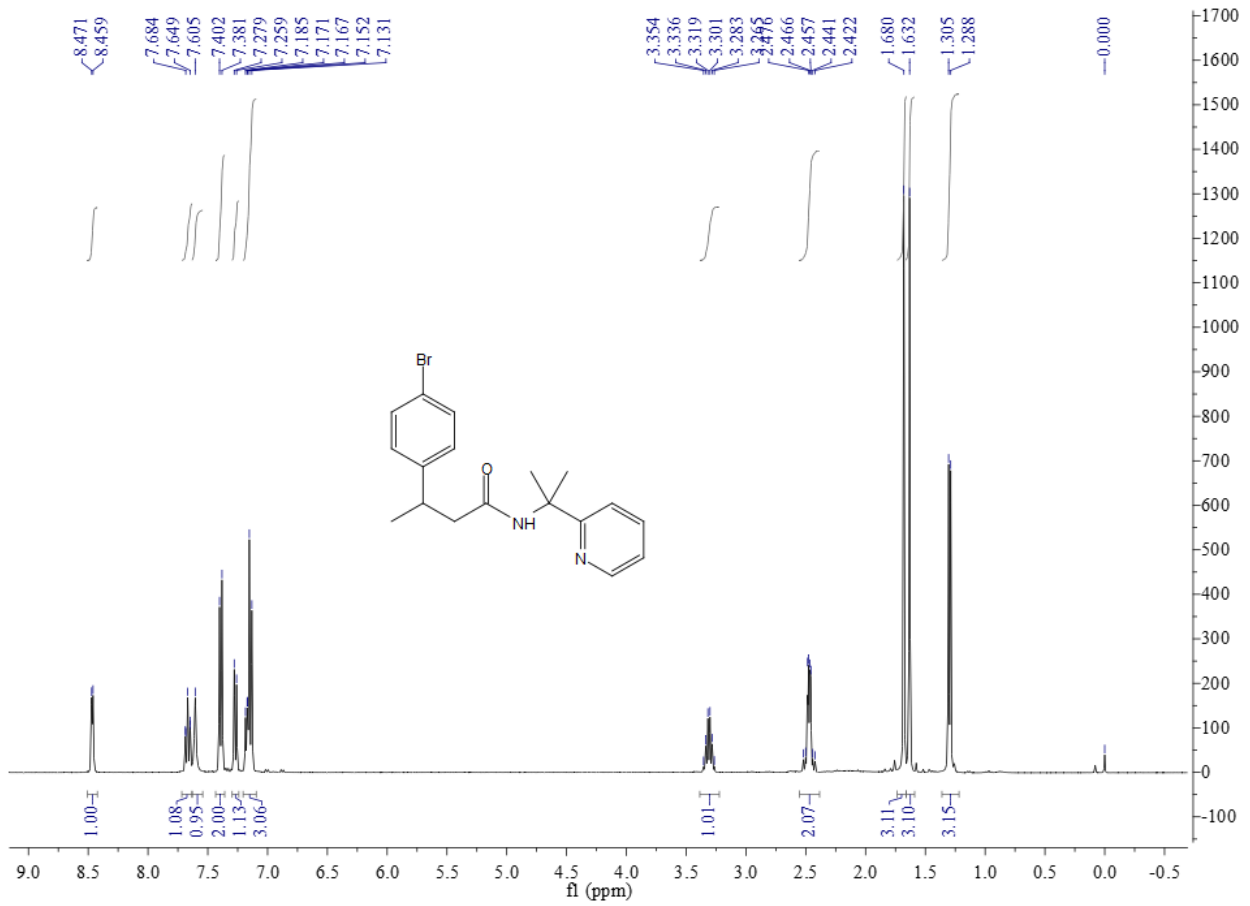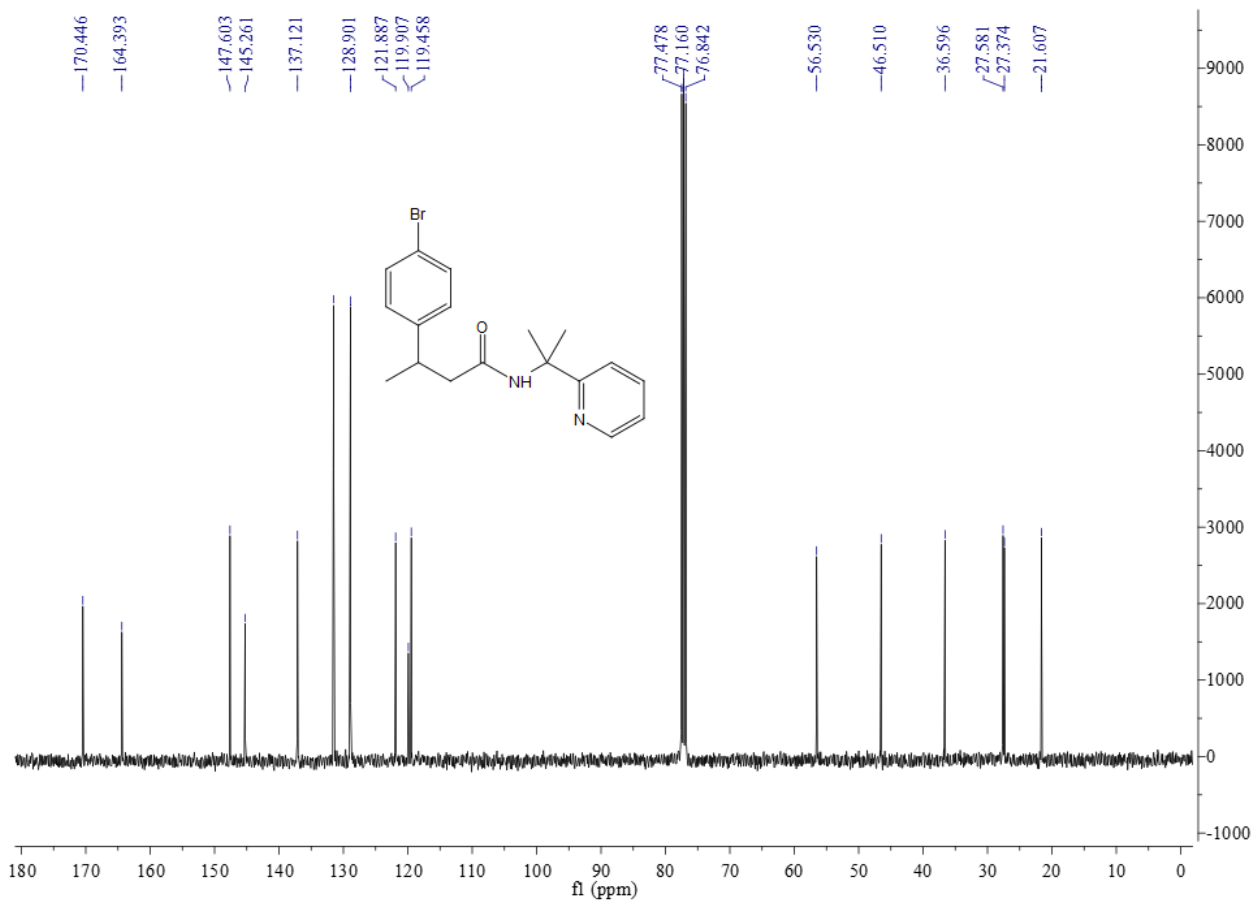

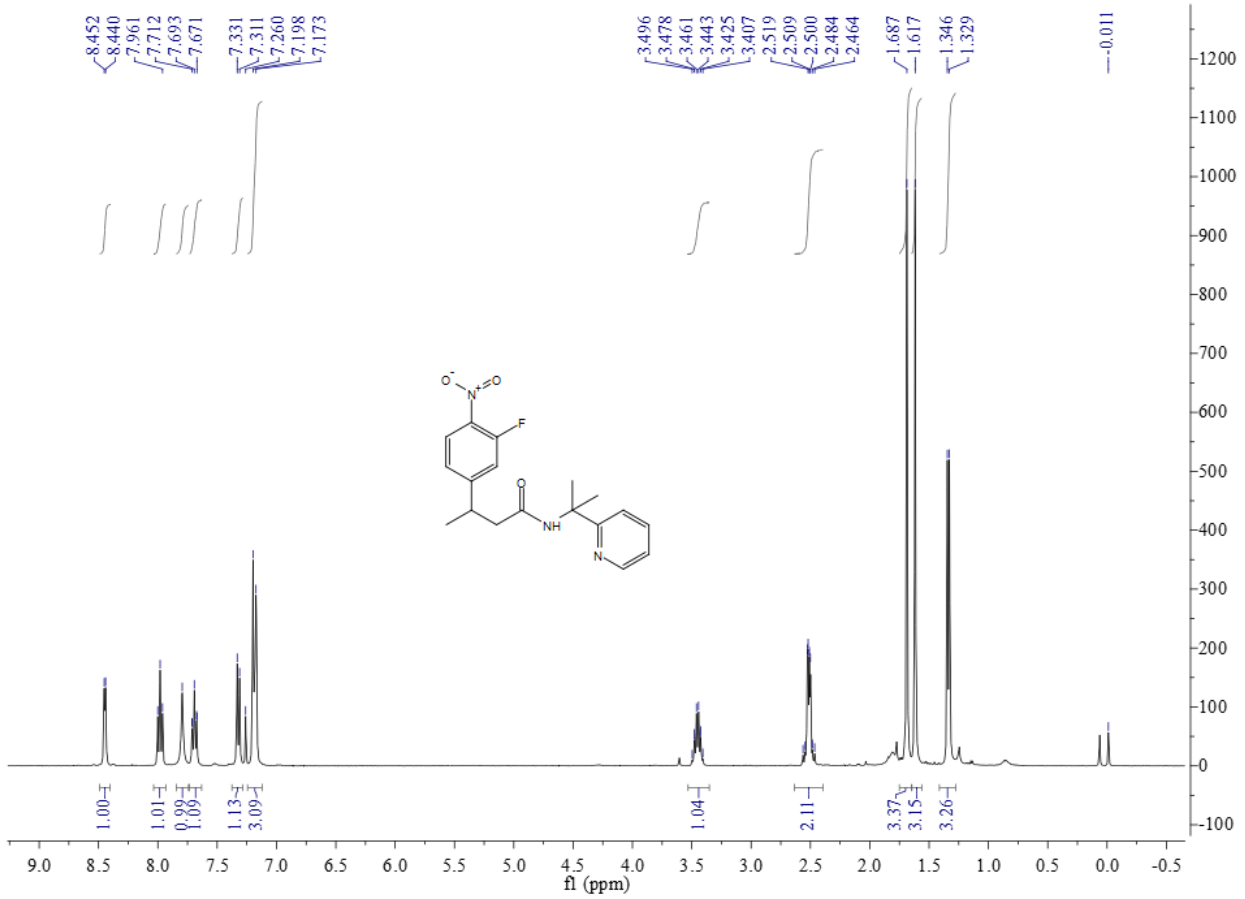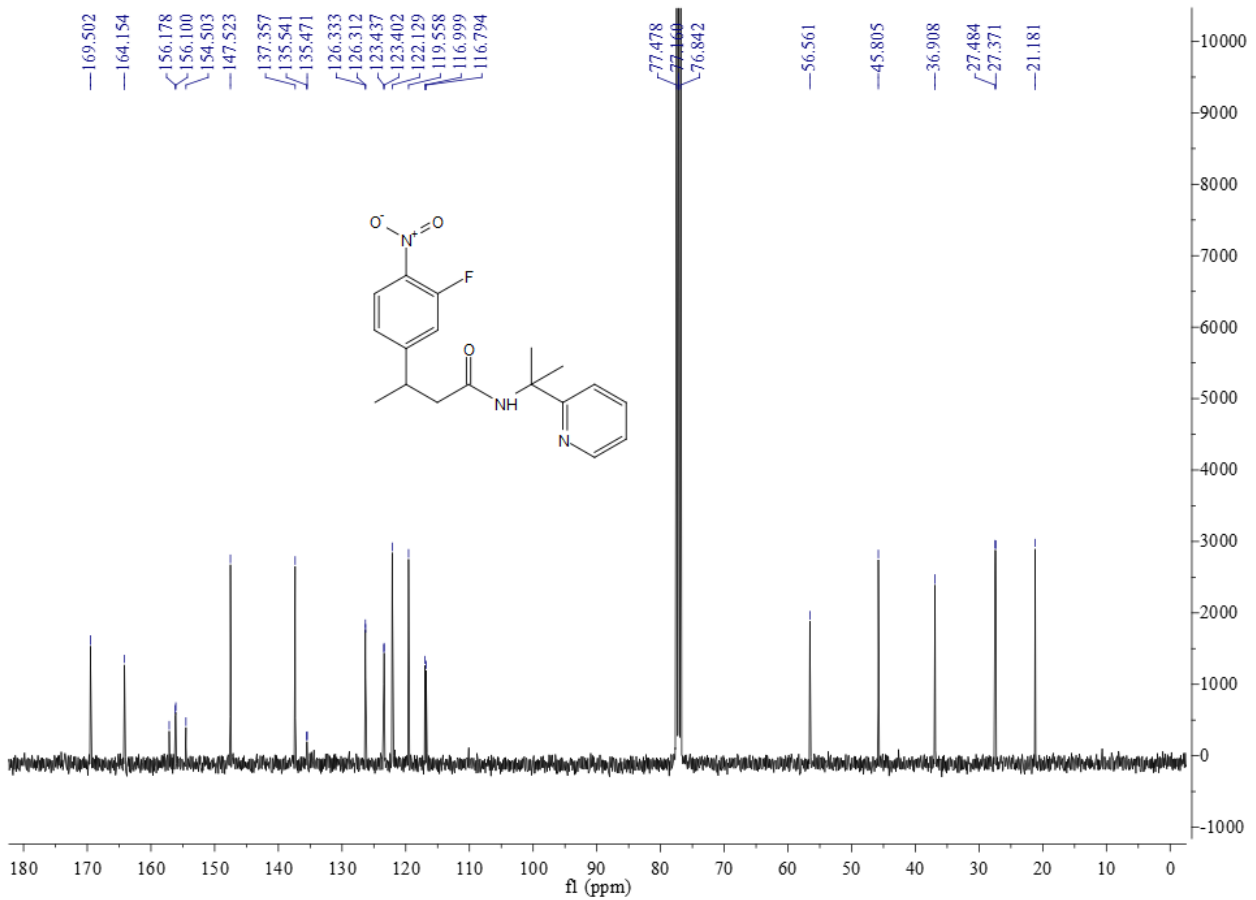

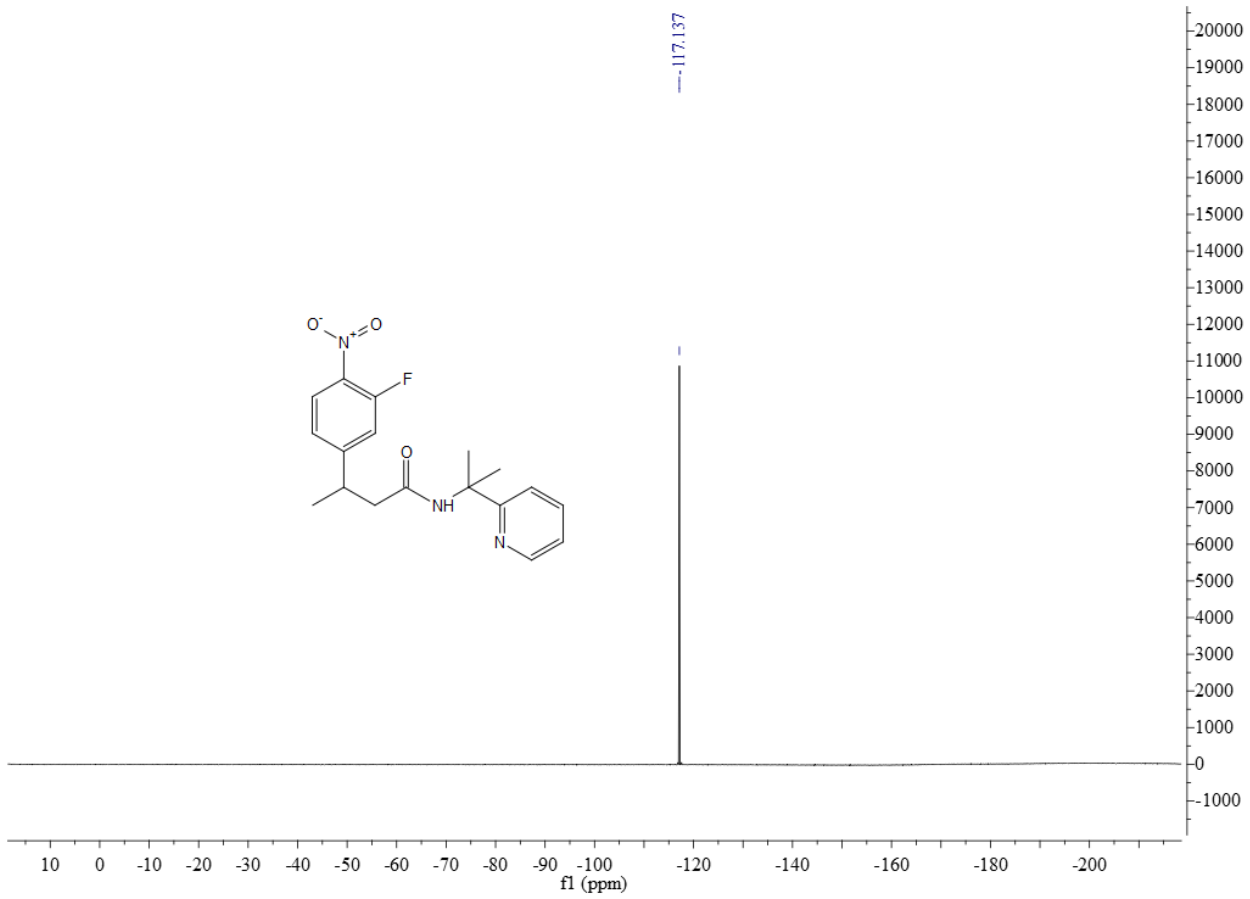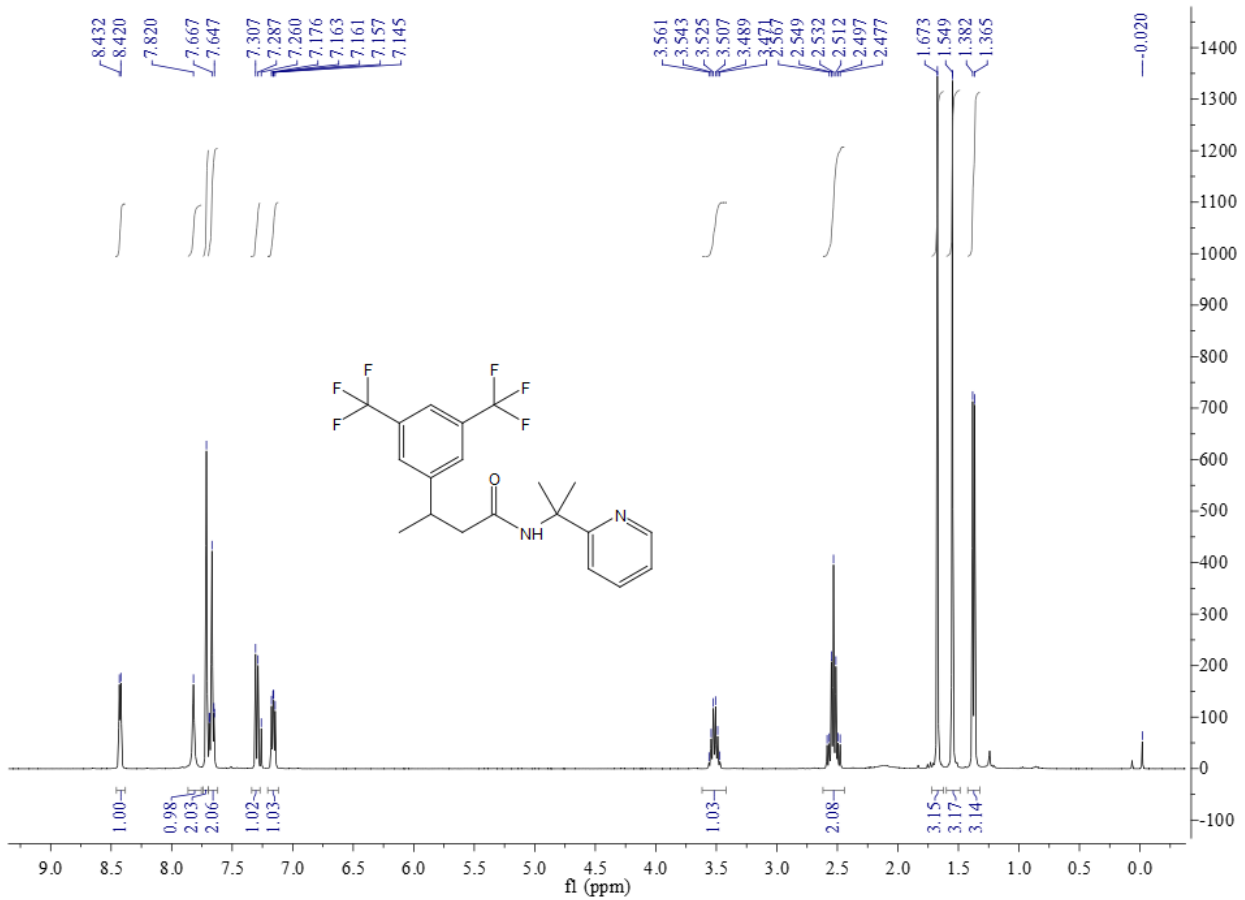

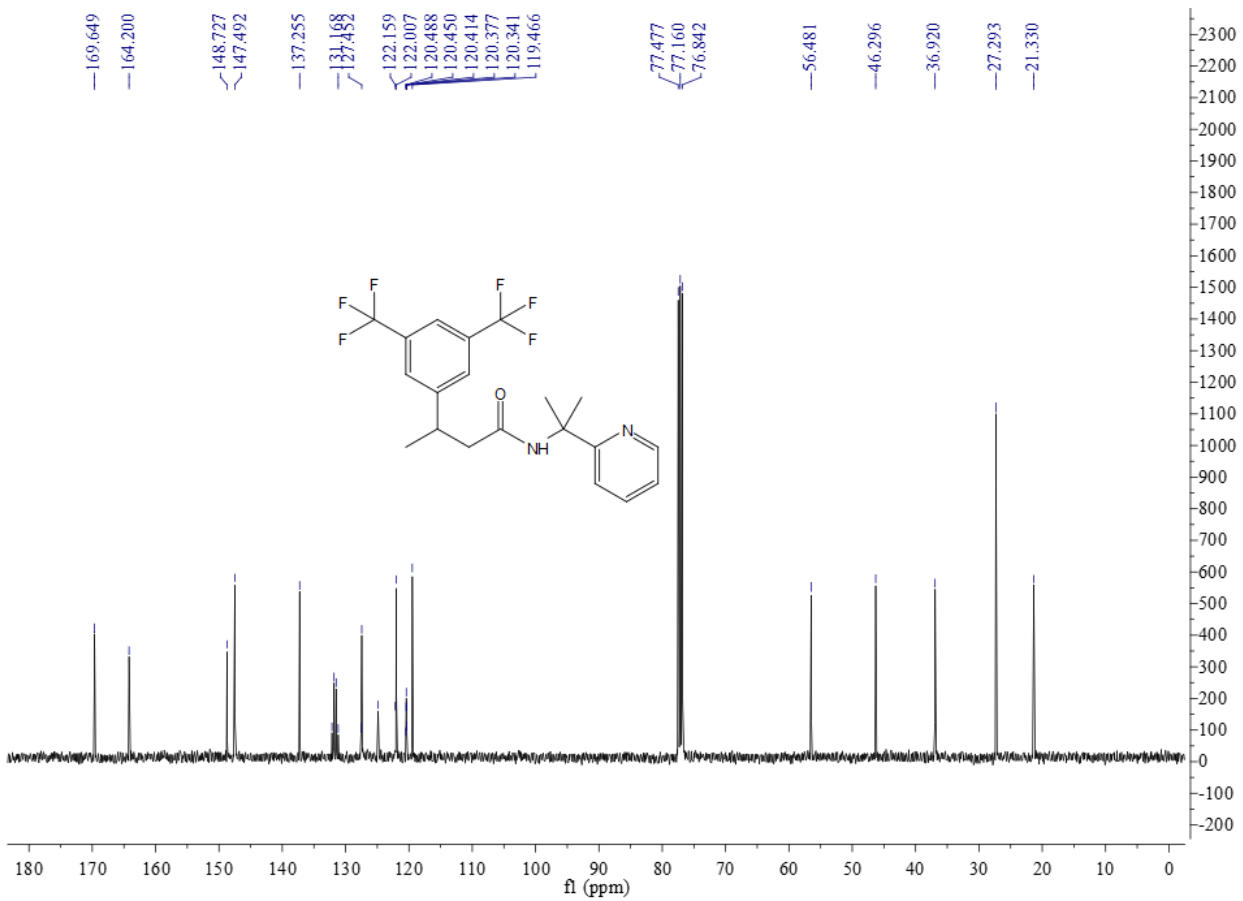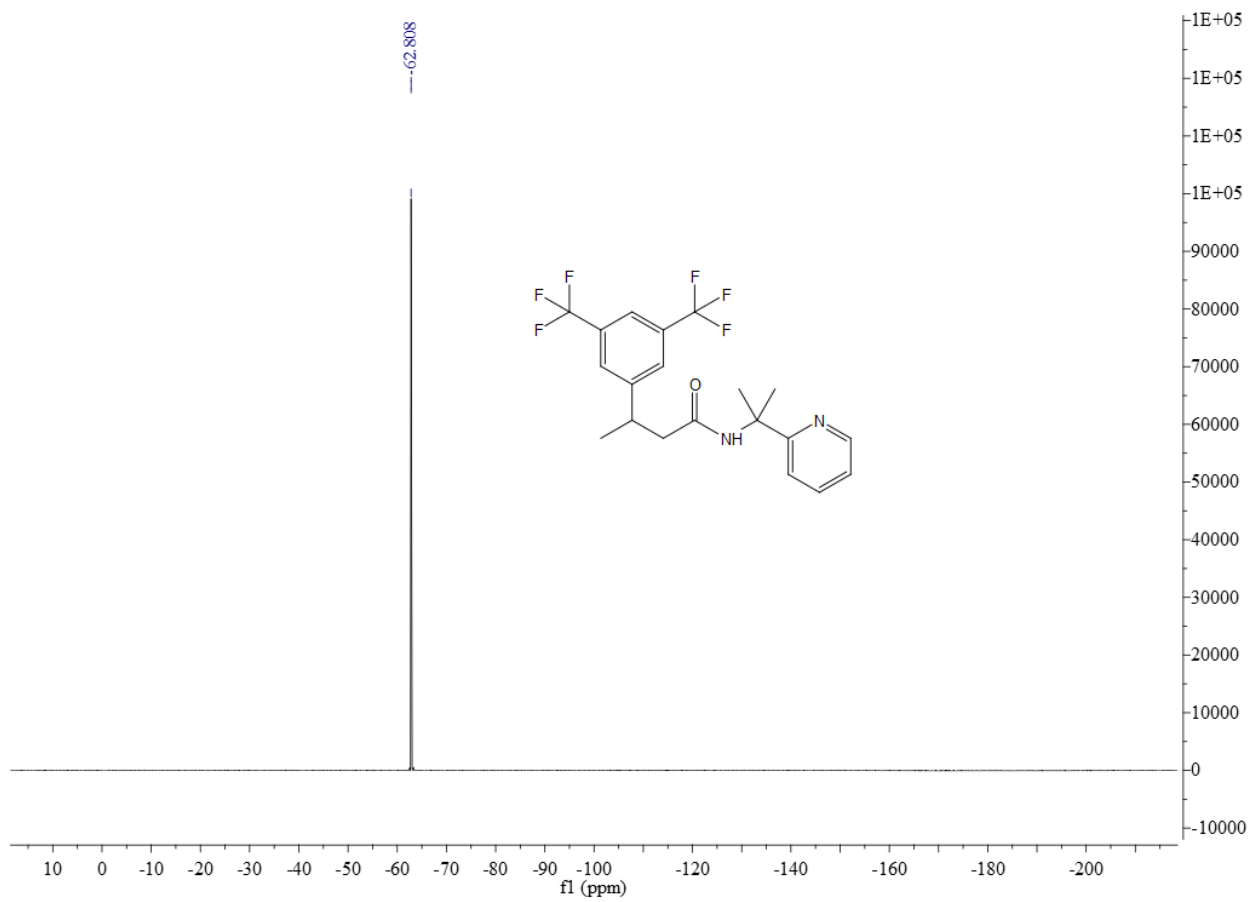



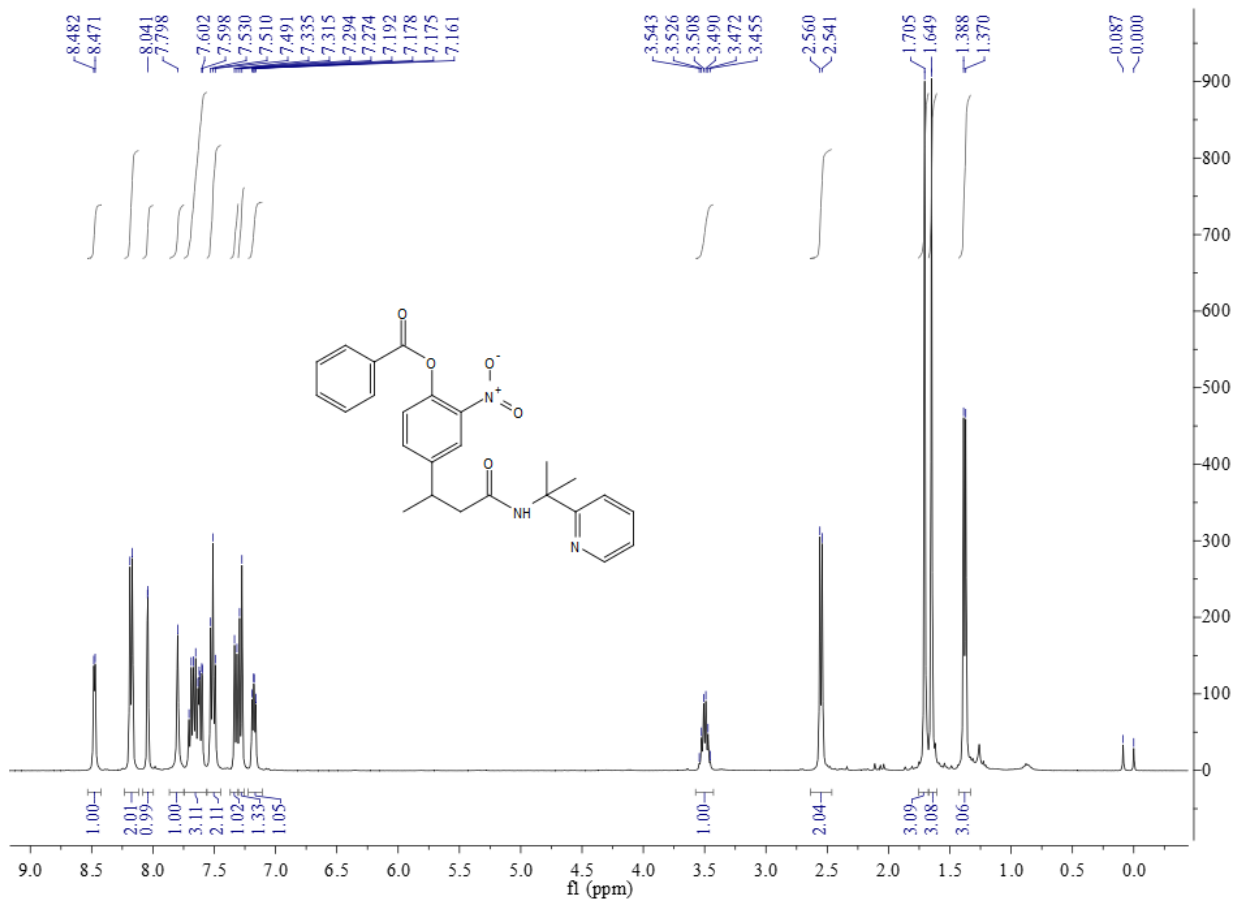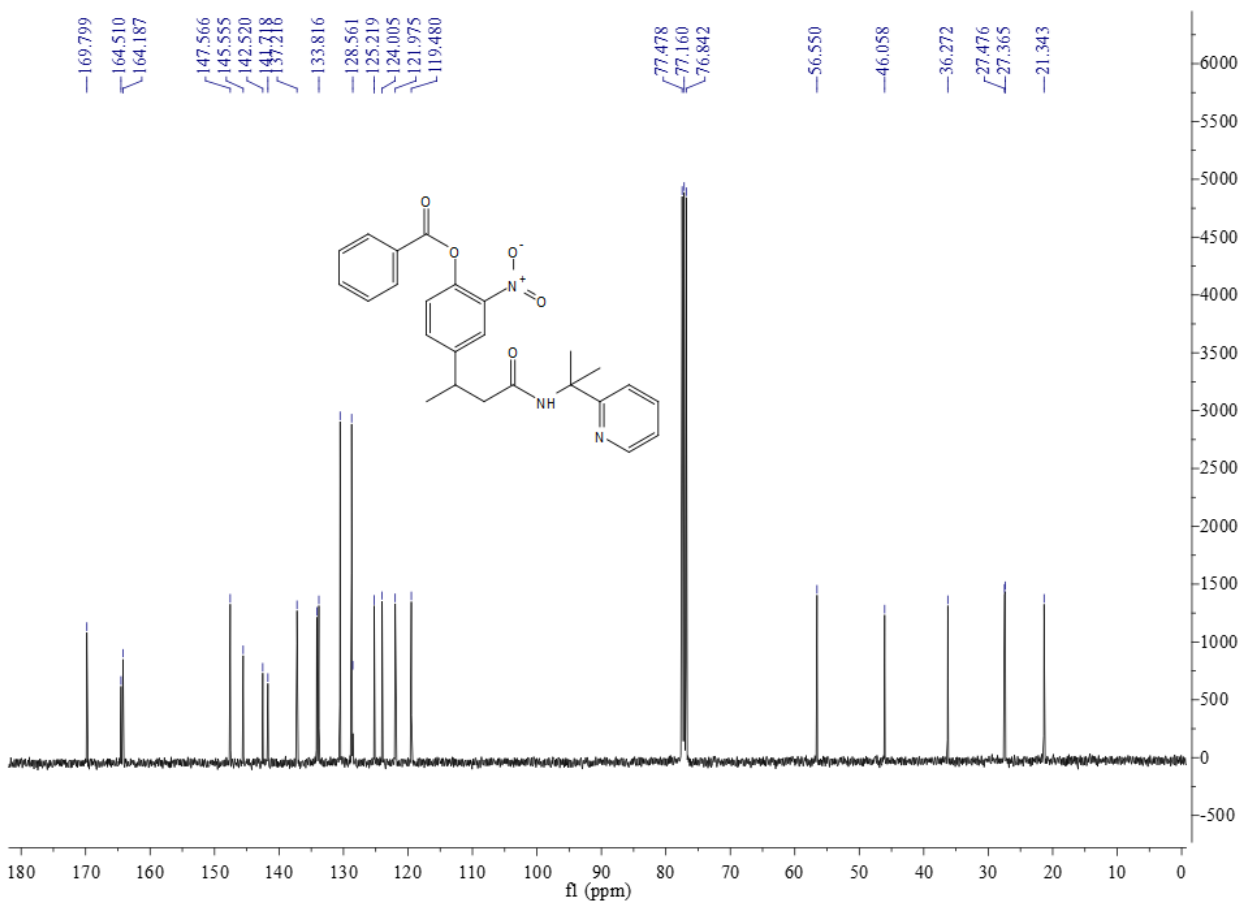

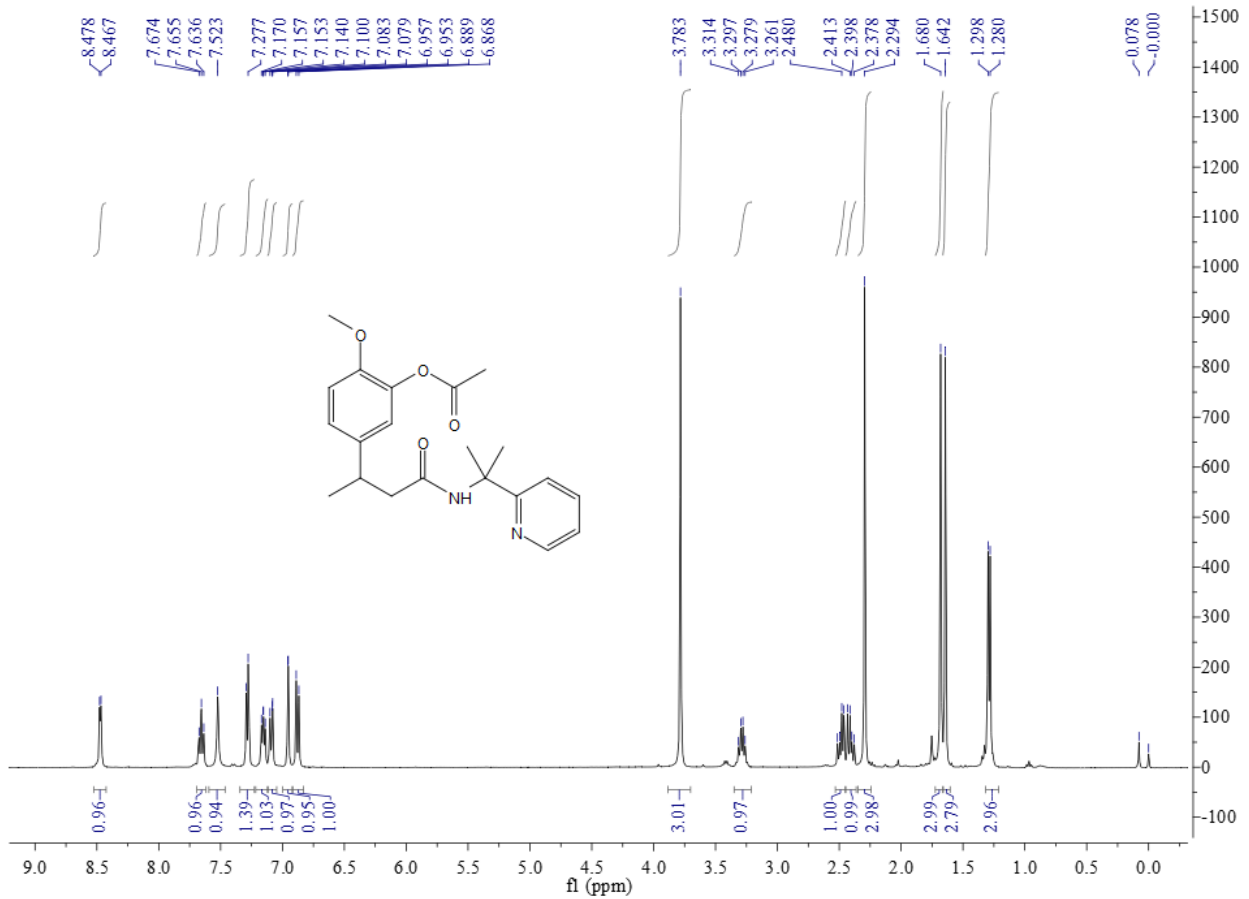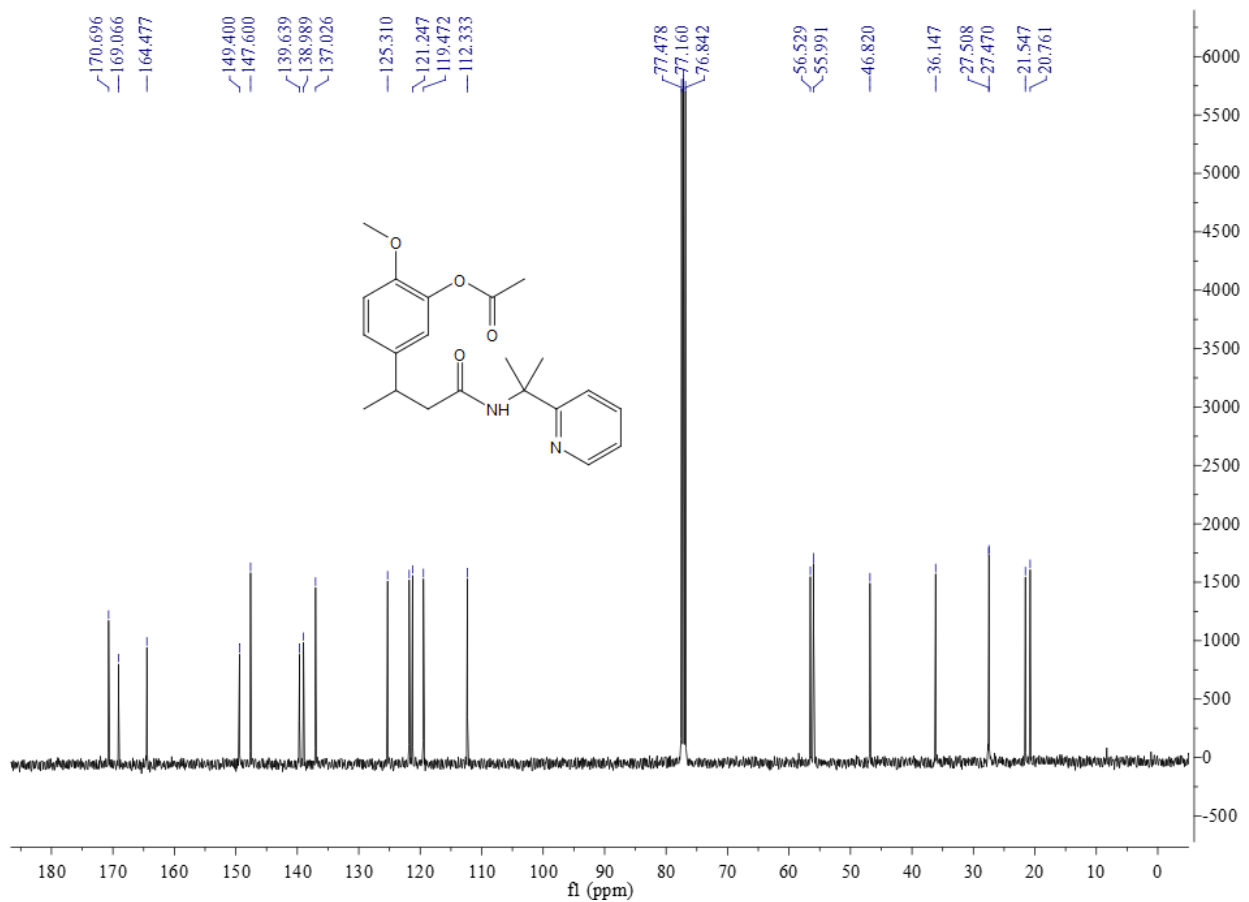

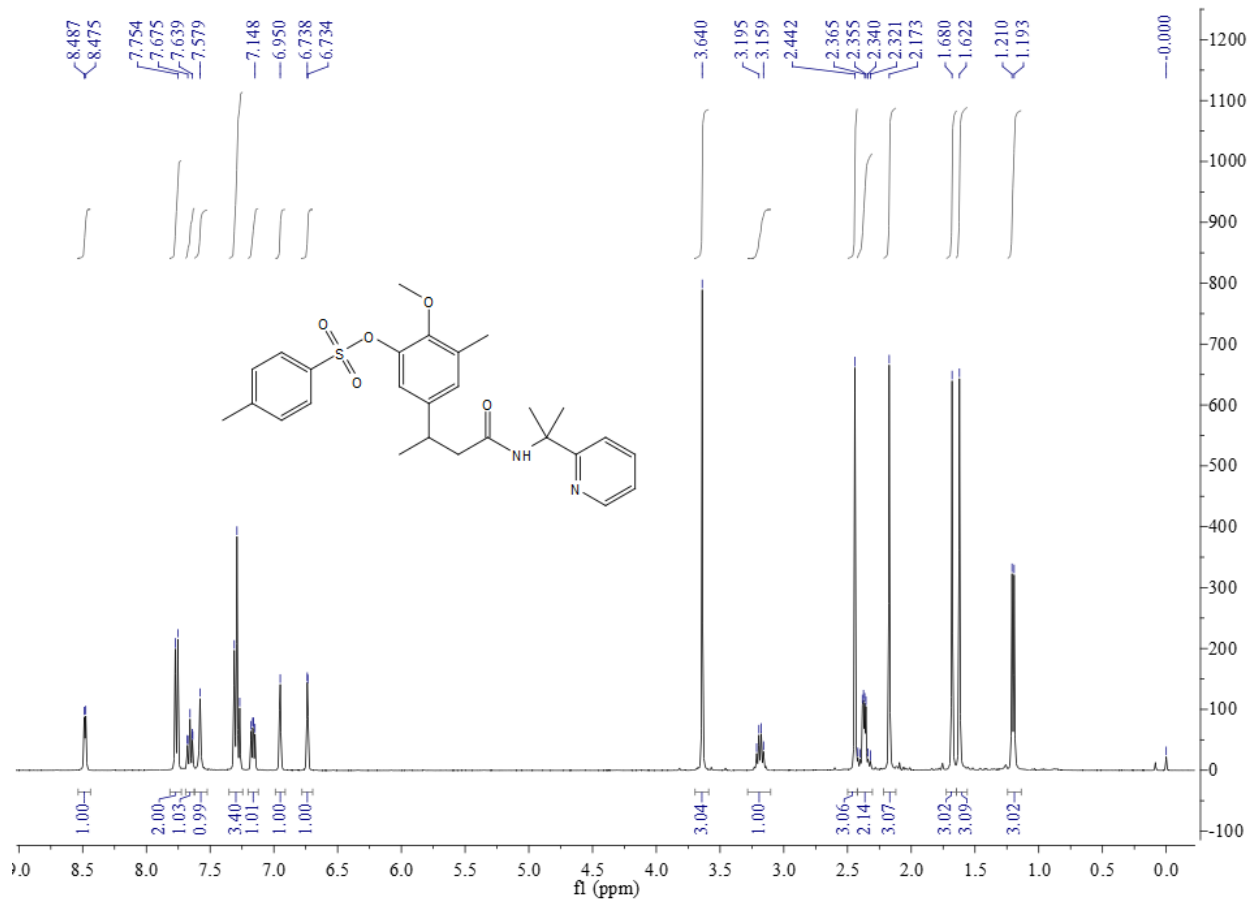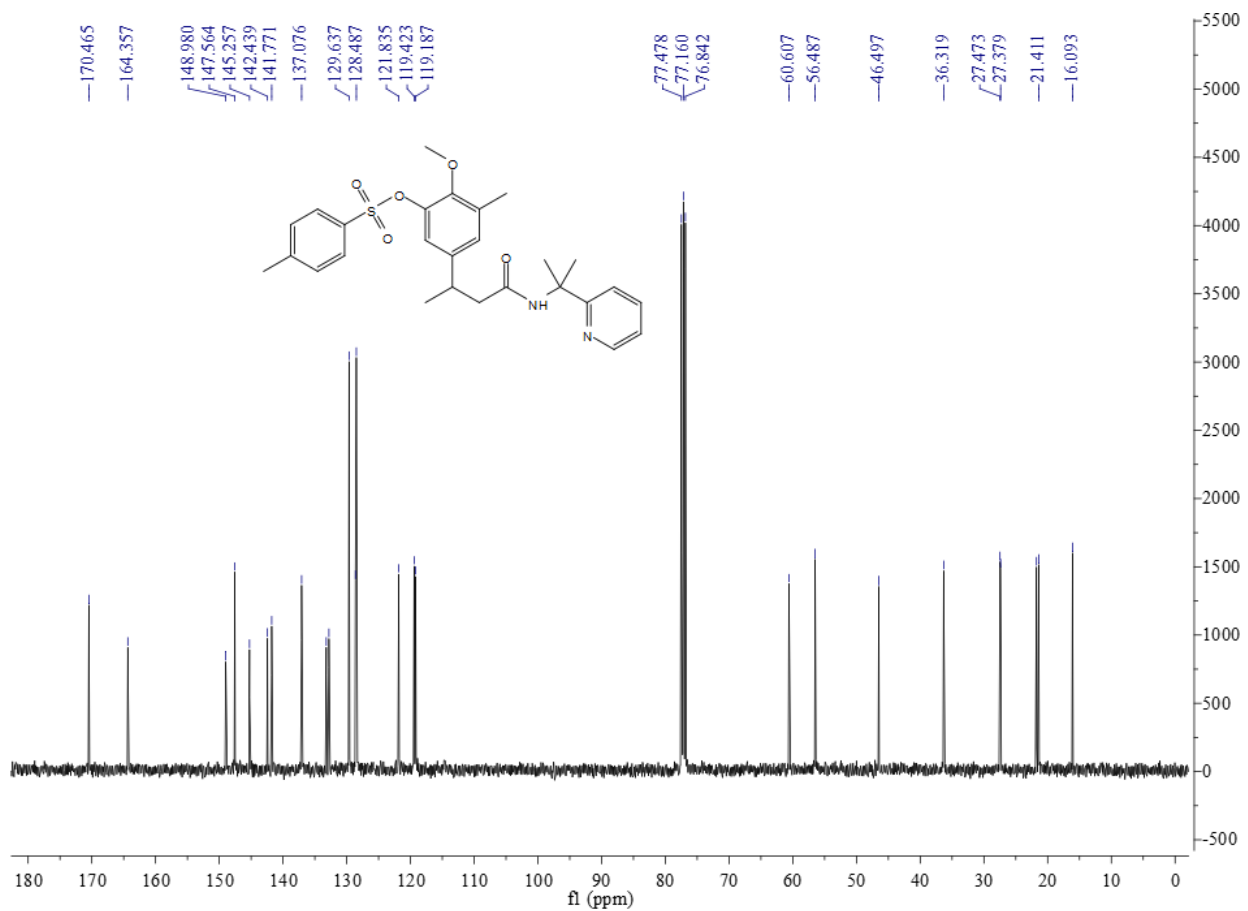

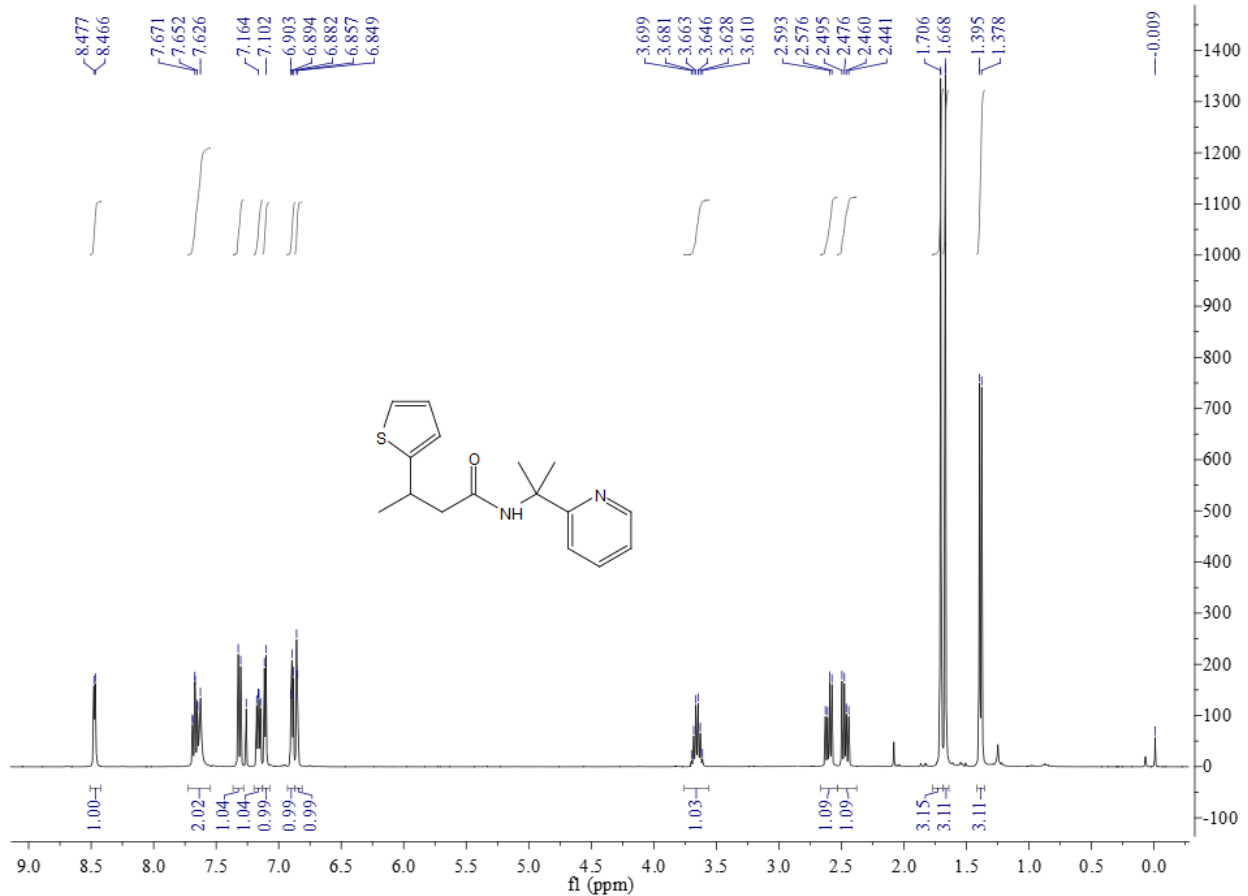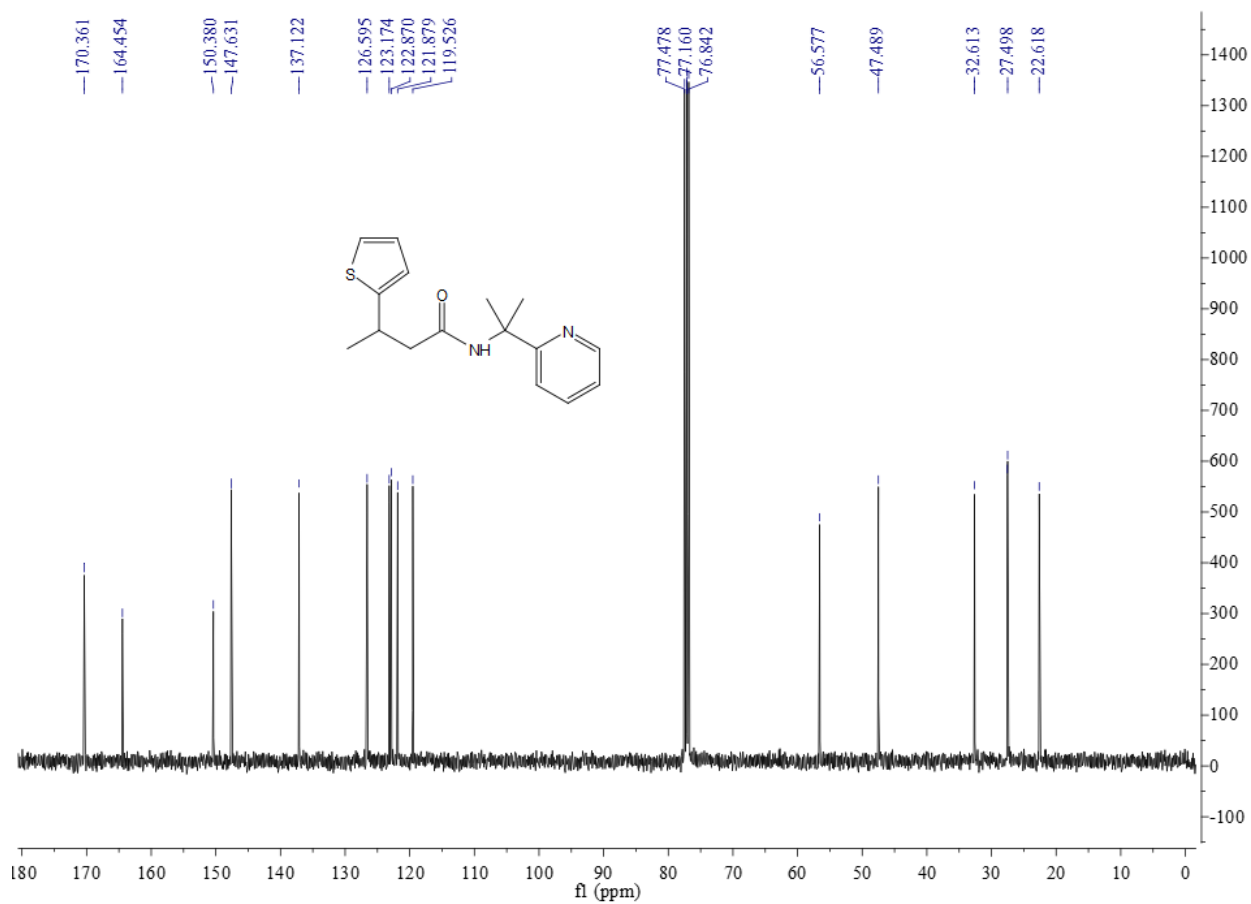

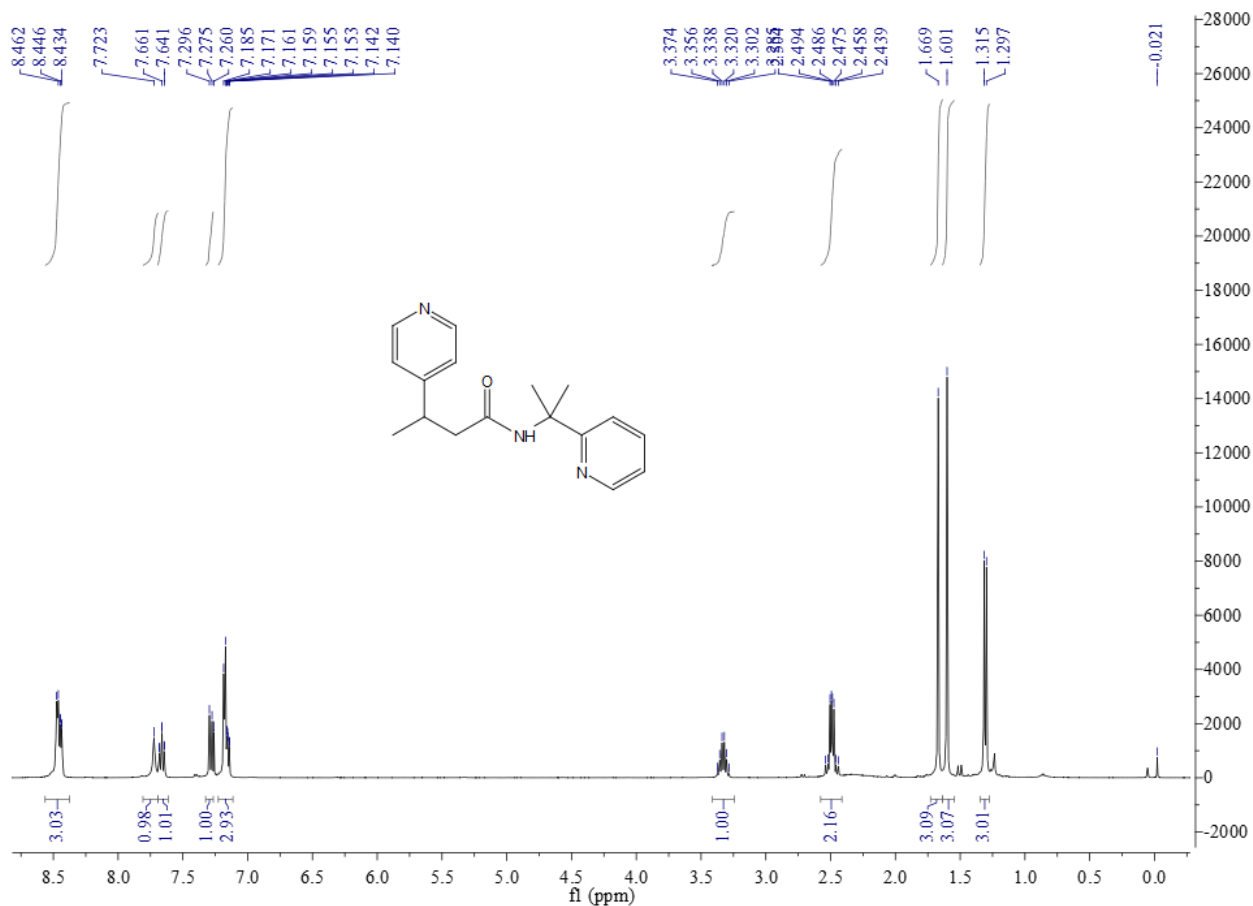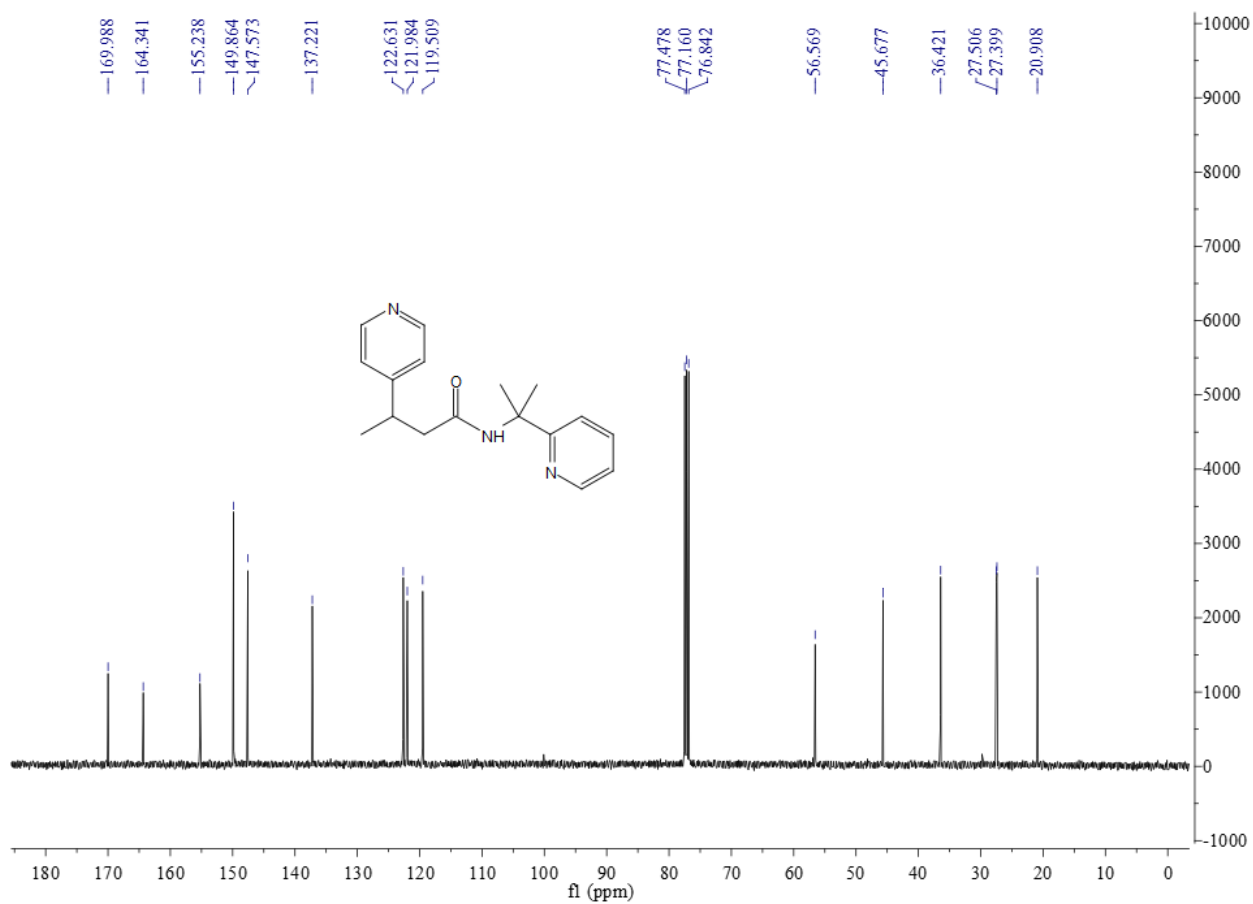

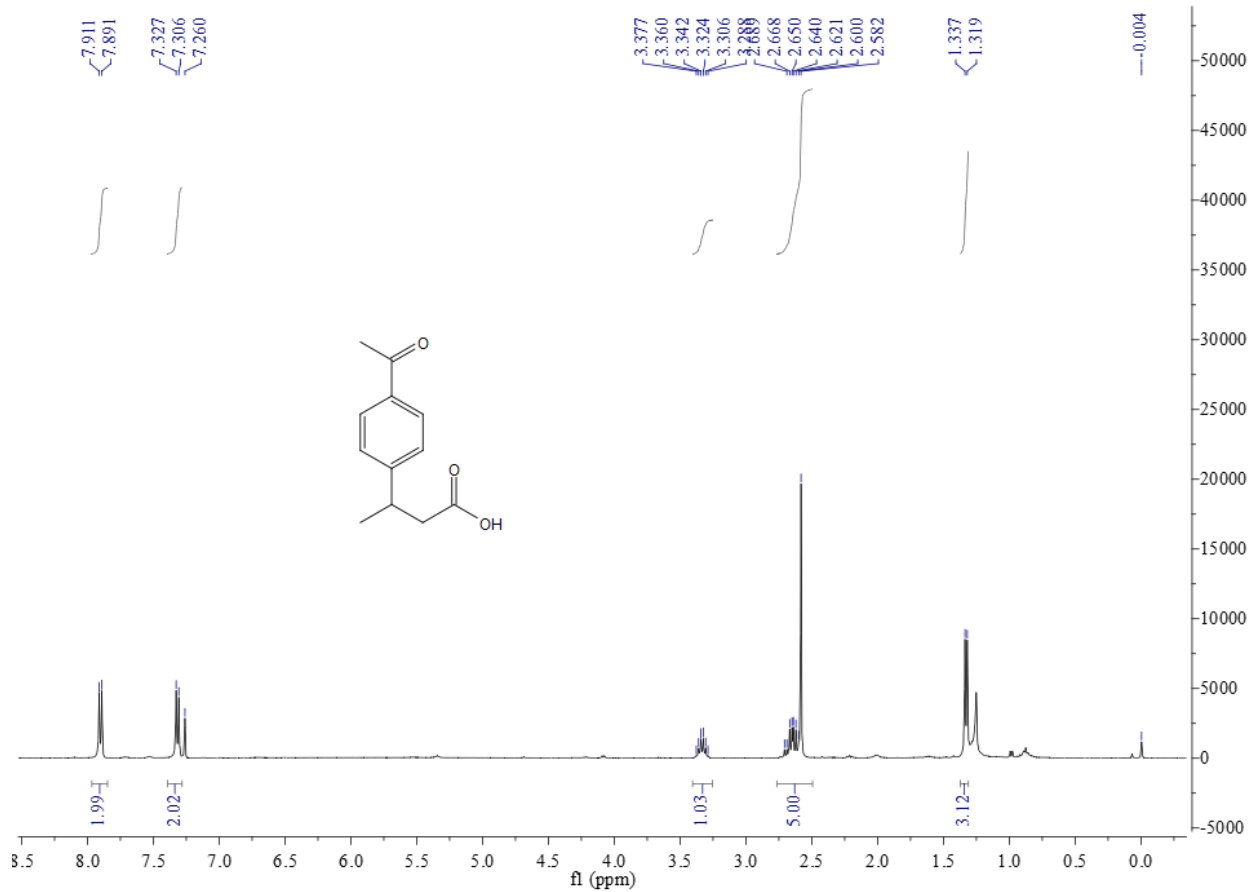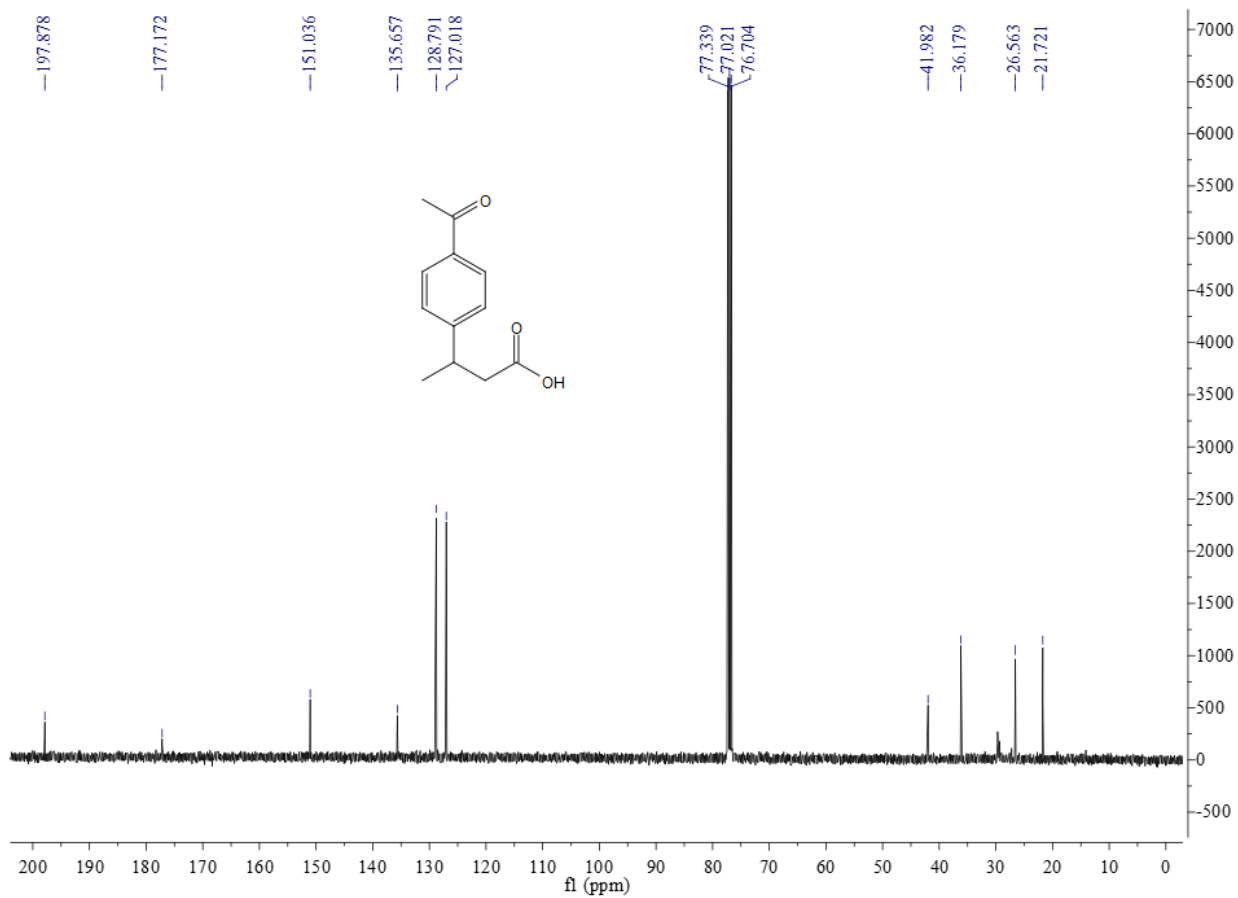

Supplement: c4cc03615h1.pdf [file c4cc03615h1.pdf]
